# Supplementary material for: Application of ferrocene-bridged N-heterocyclic carbene stabilised bis-phosphinidenes in Sn(ii) complexation
Source: Royal Society of Chemistry journal article supplement (doi:10.1039/d1dt03016g), 2021-01-01
Supplement: d1dt03016g1.pdf [file d1dt03016g1.pdf]

## Supporting Information

### **Application of Ferrocene-Bridged *N*-Heterocyclic Carbene Stabilized Bis-Phosphinidenes in Sn(II) Complexation**

Ramona Baierl, Arseni Kostenko, Franziska Hanusch, Shigeyoshi Inoue\*

Department of Chemistry, WACKER-Institute of Silicon Chemistry and Catalysis  
Research Center, Technische Universität München, Lichtenbergstraße 4, 85748  
Garching, Germany.

\*s.inoue@tum.de

|      |                                                                                       |     |
|------|---------------------------------------------------------------------------------------|-----|
| 1.   | Experimental Details .....                                                            | 2   |
| 1.1  | General Methods and Instrumentation .....                                             | 2   |
| 1.2  | Synthesis of BisNHCP 3a (NHC = IMes) .....                                            | 2   |
| 1.3  | Synthesis of BisNHCP 3b (NHC = <sup>Me</sup> IMes).....                               | 6   |
| 1.4  | Synthesis of BisNHCP SnCl <sub>2</sub> Complex 4a (NHC = IMes).....                   | 9   |
| 1.5  | Synthesis of BisNHCP SnBr <sub>2</sub> Complex 4b (NHC = IMes).....                   | 12  |
| 1.6  | Synthesis of BisNHCP SnI <sub>2</sub> Complex 4c (NHC = IMes).....                    | 16  |
| 1.7  | Synthesis of BisNHCP Sn(OTf) <sub>2</sub> Complex 4d (NHC = IMes) .....               | 19  |
| 1.8  | Synthesis of BisNHCP SnCl <sub>2</sub> Complex 5a (NHC = <sup>Me</sup> IMes) .....    | 23  |
| 1.9  | Synthesis of BisNHCP SnBr <sub>2</sub> Complex 5b (NHC = <sup>Me</sup> IMes).....     | 26  |
| 1.10 | Synthesis of BisNHCP SnI <sub>2</sub> Complex 5c (NHC = <sup>Me</sup> IMes) .....     | 30  |
| 1.11 | Synthesis of BisNHCP Sn(OTf) <sub>2</sub> Complex 5d (NHC = <sup>Me</sup> IMes) ..... | 33  |
| 1.12 | Synthesis of BisNHCP CuCl Complex 7a (NHC = IMes).....                                | 37  |
| 1.13 | Synthesis of BisNHCP CuCl Complex 7b (NHC = <sup>Me</sup> IMes) .....                 | 40  |
| 1.14 | Transmetallation .....                                                                | 43  |
| 1.15 | Sn(II) Transfer to bisNHI .....                                                       | 43  |
| 2.   | X-Ray Crystallographic Details .....                                                  | 43  |
| 3.   | Computational Details.....                                                            | 46  |
| 4.   | References .....                                                                      | 110 |

## 1. Experimental Details

### 1.1 General Methods and Instrumentation

All reactions were performed in flame dried glass ware under Argon in a glovebox (model LABstar from MBraun Inertgas-Systeme GmbH) or using Schlenk technique. Standard chemicals for the synthesis reactions were purchased from the commercial distributors. All used solvents were dried over Na/benzophenone prior to use. Deuterated NMR solvents were dried over 3 Å molecular sieves (C<sub>6</sub>D<sub>6</sub>), potassium mirror (THF-d<sub>8</sub>) or CaH<sub>2</sub> (CD<sub>3</sub>CN). 1,1'-Bis-(dichloro-phosphine)ferrocene, IMes, <sup>Me</sup>IMes, SnCl<sub>2</sub>·dioxane, Sn(OTf)<sub>2</sub>, and bisNHI were synthesized according to or analogue to literature known procedures.<sup>S1-6</sup>

All NMR samples were prepared in an argon atmosphere using J. Young PTFE valve NMR tubes. <sup>1</sup>H, <sup>13</sup>C, <sup>19</sup>F, <sup>31</sup>P, and <sup>119</sup>Sn NMR spectra were recorded on Bruker Avance 300 MHz, 400 MHz, and 500 MHz spectrometers at ambient temperatures (300 K). The obtained <sup>1</sup>H- and <sup>13</sup>C NMR spectra were calibrated on the residual proton and natural abundance carbon signals of the deuterated NMR solvent and the chemical shifts δ reported in ppm values, relative to tetramethylsilane. The observed signal multiplicities were abbreviated as following: s = singlet, d = doublet, t = triplet and m = multiplet.

Liquid Injection Field Desorption Ionization Mass Spectrometry (LIFDI-MS) was measured directly from an inert atmosphere glovebox with a Thermo Fisher Scientific Exactive Plus Orbitrap equipped with an ion source from Linden CMS.<sup>S7</sup>

Quantitative elemental analyses (EA) were carried out using a EURO EA (HEKAtech) instrument equipped with a CHNS combustion analyser at the Laboratory for Microanalysis at the TUM Catalysis Research Center.

### 1.2 Synthesis of BisNHCP 3a (NHC = IMes)

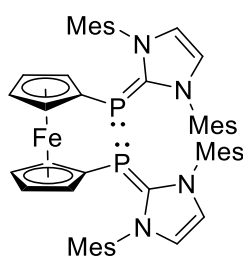

To 1,1'-bis-(dichlorophosphine)ferrocene (1.0 g, 2.58 mmol, 1.0 eq) and IMes (1.73 g, 5.67 mmol, 2.2 eq) was added hexane (150 mL) and the suspension stirred at r.t. overnight. The precipitate was separated via Whatman filtration and washed with hexane (20 mL). The yellow solids were dried under vacuum and suspended in THF (120 mL). After cooling to -80 °C, a NaNaph solution (30 mL, 3.44 M in THF, 10.32 mmol, 4.0 eq) was

added dropwise over 10 min. After 30 min the suspension was warmed to r.t. and stirred overnight. The solvent was removed in vacuo and the resulting solids extracted with toluene (100 mL). The solids were dried and washed with hot hexane (60 + 40 mL). After drying under vacuum, the product was isolated as yellow powder (560 mg, 0.66 mmol, 25%). Crystals suitable for SC-XRD analysis were grown from a saturated Et<sub>2</sub>O solution at -35 °C.

**<sup>1</sup>H NMR (400 MHz, C<sub>6</sub>D<sub>6</sub>, 300K):** δ[ppm] = 6.49 (s, 8H, C<sub>Mes</sub>H), 5.70 (s, 4H, NCH), 3.76 (s, 4H, C<sub>Cp</sub>H), 3.61 (s, 4H, C<sub>Cp</sub>H), 2.16 (s, 24H, *o*-C<sub>Mes</sub>CH<sub>3</sub>), 1.95 (s, 12H, *p*-C<sub>Mes</sub>CH<sub>3</sub>).

**<sup>13</sup>C NMR (101 Hz, C<sub>6</sub>D<sub>6</sub>, 300K):** δ[ppm] = 170.51 (d, <sup>1</sup>J<sub>C,P</sub> = 105.8 Hz, C<sub>carbene</sub>P), 138.10 (*p*-C<sub>Mes</sub>CH<sub>3</sub>), 136.04 (NC<sub>Mes</sub>), 134.45 (*o*-C<sub>Mes</sub>CH<sub>3</sub>), 129.32 (C<sub>Mes</sub>H), 117.88 (NCH), 77.44 (s, C<sub>Cp</sub>H), 77.37 (s, C<sub>Cp</sub>H), 72.39 (d, <sup>1</sup>J<sub>C,P</sub> = 36.4 Hz, C<sub>Cp</sub>P), 71.55 (s, C<sub>Cp</sub>H), 71.49 (s, C<sub>Cp</sub>H), 20.94 (*p*-C<sub>Mes</sub>CH<sub>3</sub>), 18.44 (*o*-C<sub>Mes</sub>CH<sub>3</sub>).

**<sup>31</sup>P NMR (162 Hz, C<sub>6</sub>D<sub>6</sub>, 300K):** δ[ppm] = -56.98

**Elemental Analysis:** C<sub>52</sub>H<sub>56</sub>FeN<sub>4</sub>P<sub>2</sub>

Calculated [%]: C (73.06), H (6.60), N (6.55)

Observed [%]: C (72.69), H (6.52), N (6.37)

**LIFDI-MS:** Calculated for C<sub>52</sub>H<sub>56</sub>FeN<sub>4</sub>P<sub>2</sub>: 854.33296

Observed: 854.33157

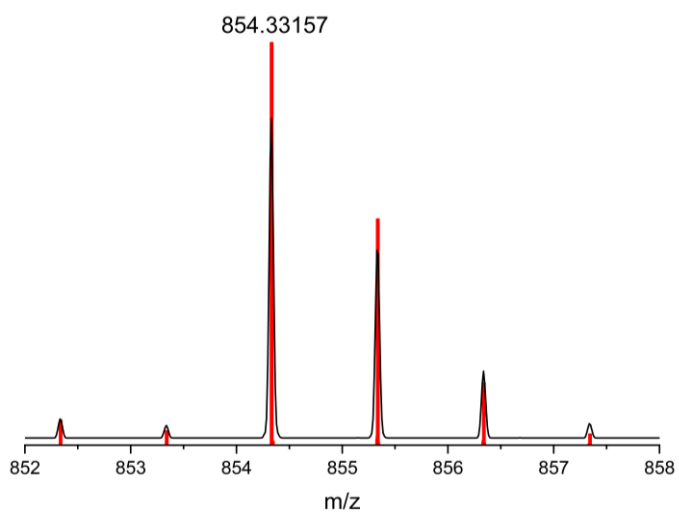

**Figure S1** Measured (black) and calculated (red) LIFDI-MS for **3a**.

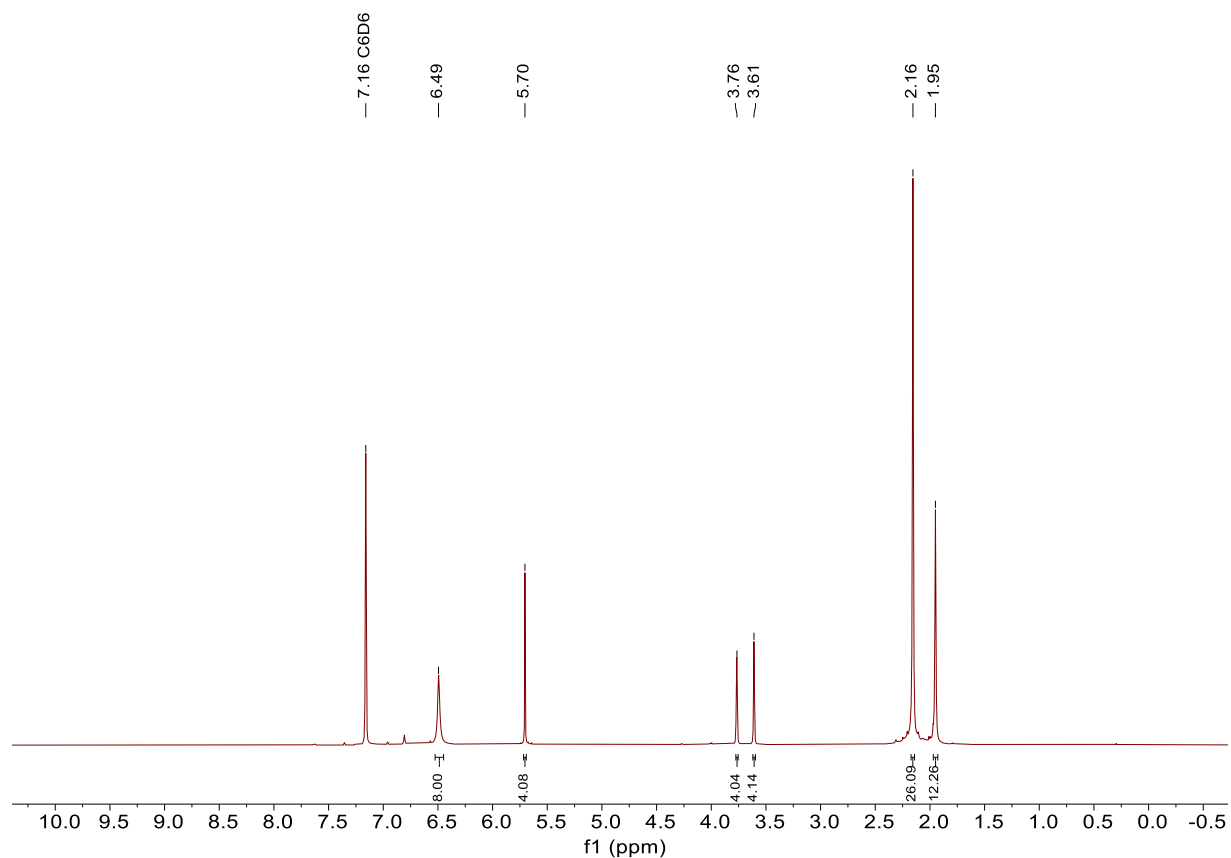

**Figure S2**  $^1\text{H}$  NMR of bisNHCP **3a** in  $\text{C}_6\text{D}_6$ .

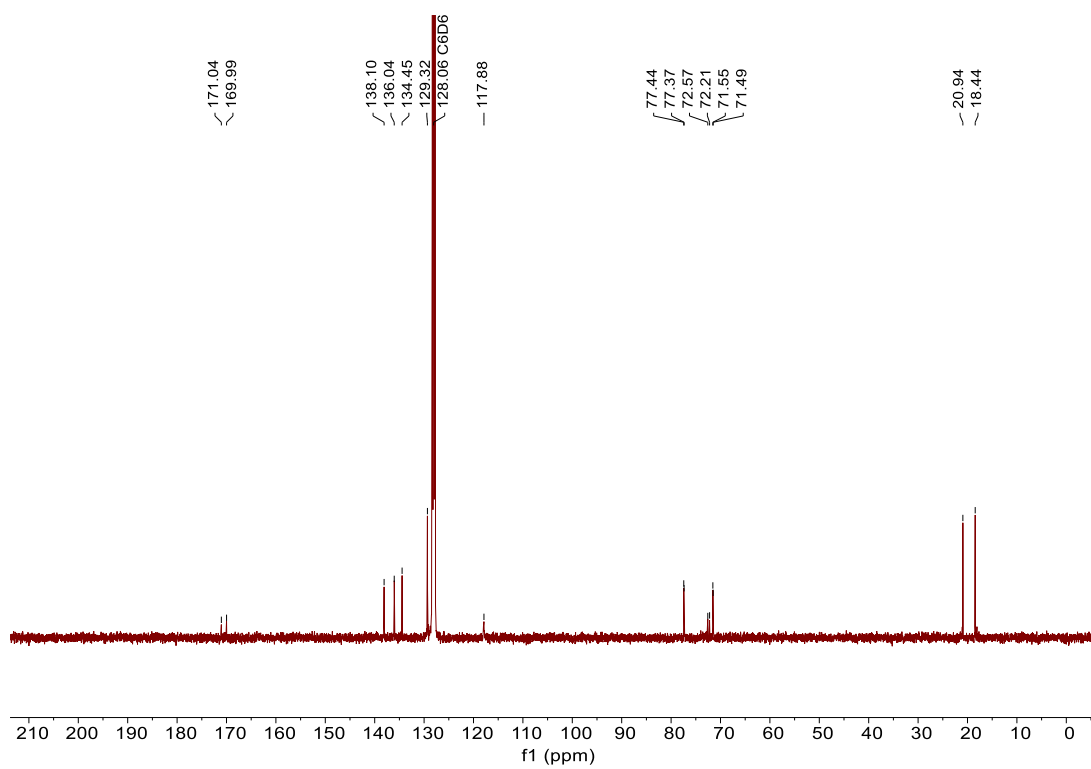

**Figure S3**  $^{13}\text{C}$  NMR of bisNHCP **3a** in  $\text{C}_6\text{D}_6$ .

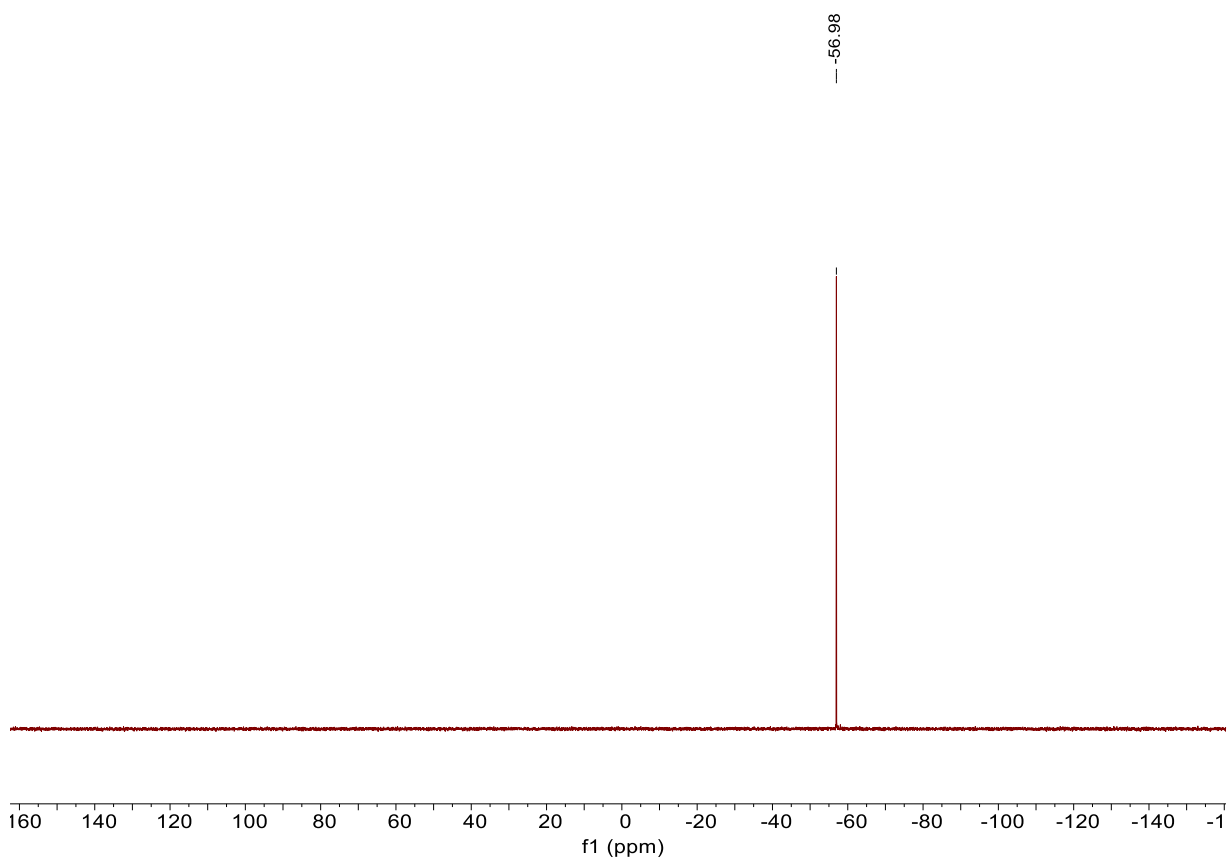

**Figure S4**  $^{31}\text{P}$  NMR of bisNHCP **3a** in  $\text{C}_6\text{D}_6$ .

### 1.3 Synthesis of BisNHCP 3b (NHC = <sup>Me</sup>IMes)

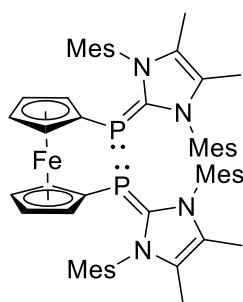

To 1,1'-bis-(dichlorophosphine)ferrocene (1.0 g, 2.58 mmol, 1.0 eq) and <sup>Me</sup>IMes (1.89 g, 5.67 mmol, 2.2 eq) were added hexane (150 mL) and the suspension stirred at r.t. overnight. The precipitate was separated via Whatman filtration and washed with hexane (20 mL). The yellow solids were dried under vacuum and suspended in THF (120 mL). After cooling to -80 °C, a NaNaph solution (30 mL, 3.44 M in THF, 10.32 mmol, 4.0 eq) was added over 10 min. After 30 min the cooling bath was removed and the suspension stirred overnight. The solvent was removed and the resulting solids extracted with toluene (100 mL). The solvent was removed and the solids washed with warm hexane (40 + 10 mL). The product was isolated as orange powder (1.1 g, 1.21 mmol, 47%). Crystals suitable for SC-XRD analysis were grown from a saturated Et<sub>2</sub>O solution at -35 °C.

**<sup>1</sup>H NMR (400 MHz, C<sub>6</sub>D<sub>6</sub>, 300K):** δ[ppm] = 6.52 (s, 8H, C<sub>Mes</sub>H), 3.78 (s, 4H, C<sub>Cp</sub>H), 3.62 (s, 4H, C<sub>Cp</sub>H), 2.17 (s, 24H, *o*-C<sub>Mes</sub>CH<sub>3</sub>), 1.96 (s, 12H, *p*-C<sub>Mes</sub>CH<sub>3</sub>), 1.34 (s, 12H, NCCH<sub>3</sub>).

**<sup>1</sup>H NMR (400 MHz, THF-d<sub>8</sub>, 300K):** δ[ppm] = 6.70 (s, 8H, C<sub>Mes</sub>H), 3.28 (s, 4H, C<sub>Cp</sub>H), 3.18 (s, 4H, C<sub>Cp</sub>H), 2.18 (s, 12H, *p*-C<sub>Mes</sub>CH<sub>3</sub>), 2.06 (s, 24H, *o*-C<sub>Mes</sub>CH<sub>3</sub>), 1.58 (s, 12H, NCCH<sub>3</sub>).

**<sup>13</sup>C (101 MHz, C<sub>6</sub>D<sub>6</sub>, 300K)** δ[ppm] = 169.76 (d, <sup>1</sup>J<sub>C,P</sub> = 104.9 Hz, C<sub>carbene</sub>P), 137.96 (*p*-C<sub>Mes</sub>CH<sub>3</sub>), 136.52 (NC<sub>Mes</sub>), 132.85 (*o*-C<sub>Mes</sub>CH<sub>3</sub>), 129.44 (C<sub>Mes</sub>H), 120.26 (NCCH<sub>3</sub>), 77.50 (s, C<sub>Cp</sub>H), 77.43 (s, C<sub>Cp</sub>H), 72.99 (d, <sup>1</sup>J<sub>C,P</sub> = 36.8 Hz, C<sub>Cp</sub>P), 71.60 (s, C<sub>Cp</sub>H), 71.54 (s, C<sub>Cp</sub>H), 21.00 (*p*-C<sub>Mes</sub>CH<sub>3</sub>), 18.23 (*o*-C<sub>Mes</sub>CH<sub>3</sub>), 8.68 (NCCH<sub>3</sub>).

**<sup>31</sup>P (162 Hz, C<sub>6</sub>D<sub>6</sub>, 300K)** δ[ppm] = -59.76.

**<sup>31</sup>P (162 Hz, THF-d<sub>8</sub>, 300K)** δ[ppm] = -59.83.

**Elemental Analysis:** C<sub>56</sub>H<sub>64</sub>FeN<sub>4</sub>P<sub>2</sub>

Calculated [%]: C (73.84), H (7.08), N (6.15)

Observed [%]: C (72.69), H (7.10), N (6.03)

**LIFDI-MS:** Calculated for  $C_{56}H_{64}FeN_4P_2$ : 910.39556  
Observed: 910.39035

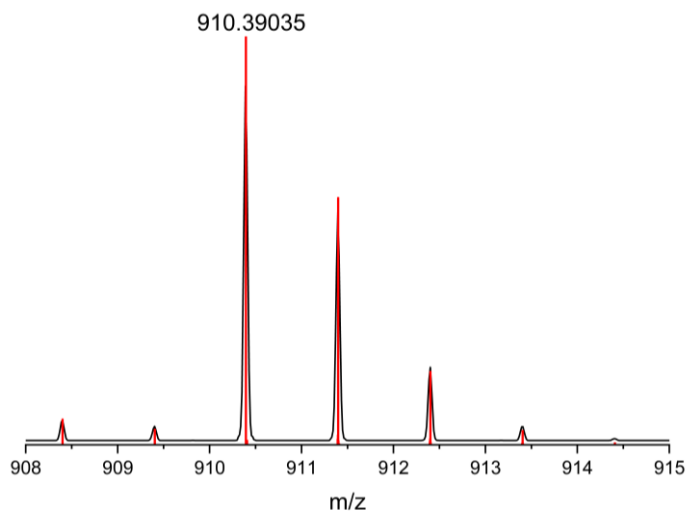

**Figure S5** Measured (black) and calculated (red) LIFDI-MS for **3b**.

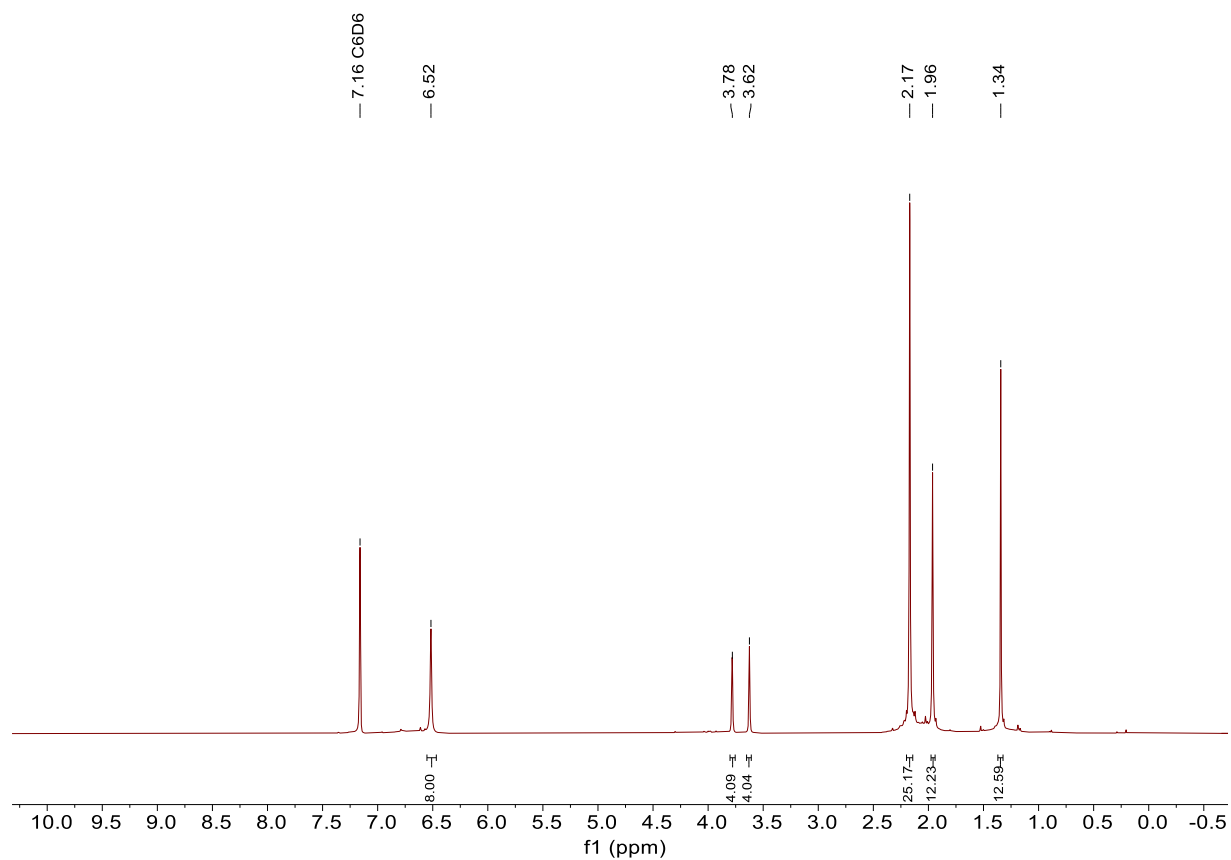

**Figure S6**  $^1H$  NMR of bisNHCP **3b** in  $C_6D_6$ .

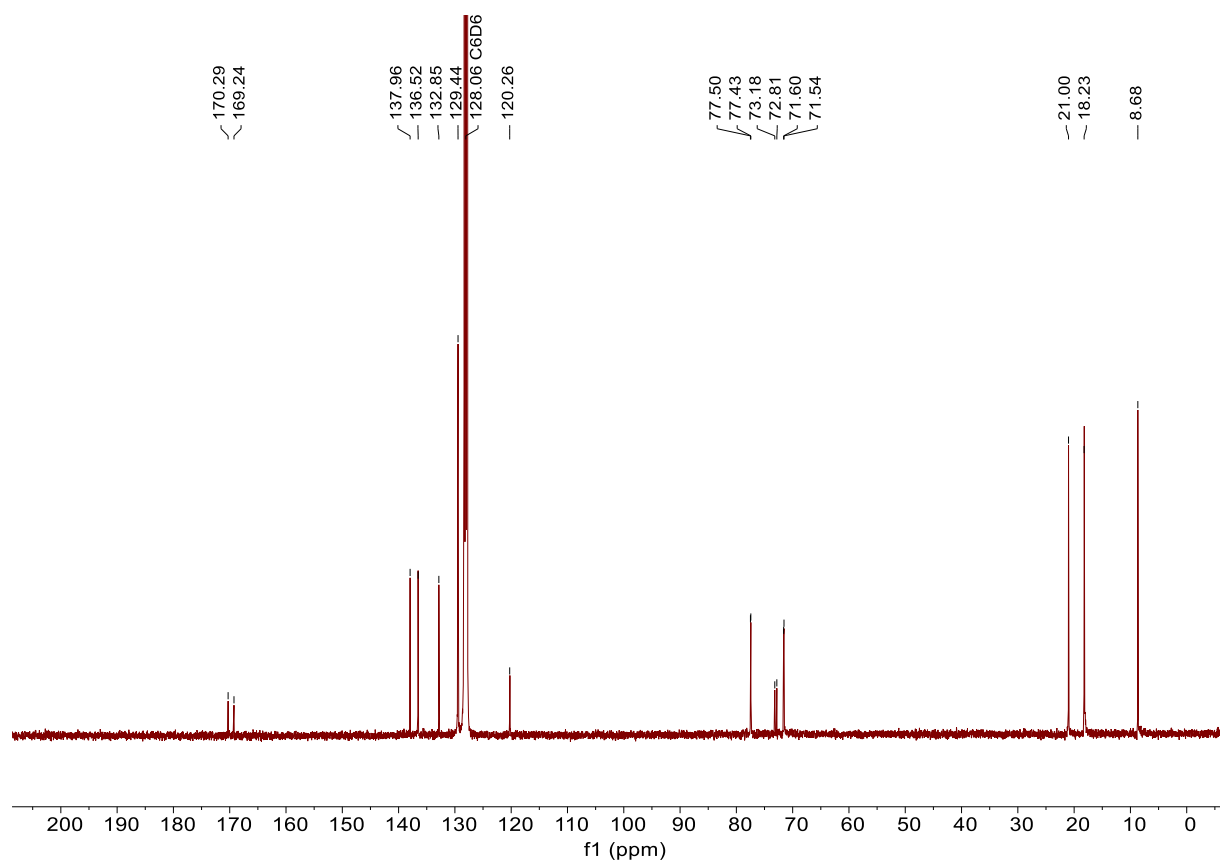

**Figure S7**  $^{13}\text{C}$  NMR of bisNHCP **3b** in  $\text{C}_6\text{D}_6$ .

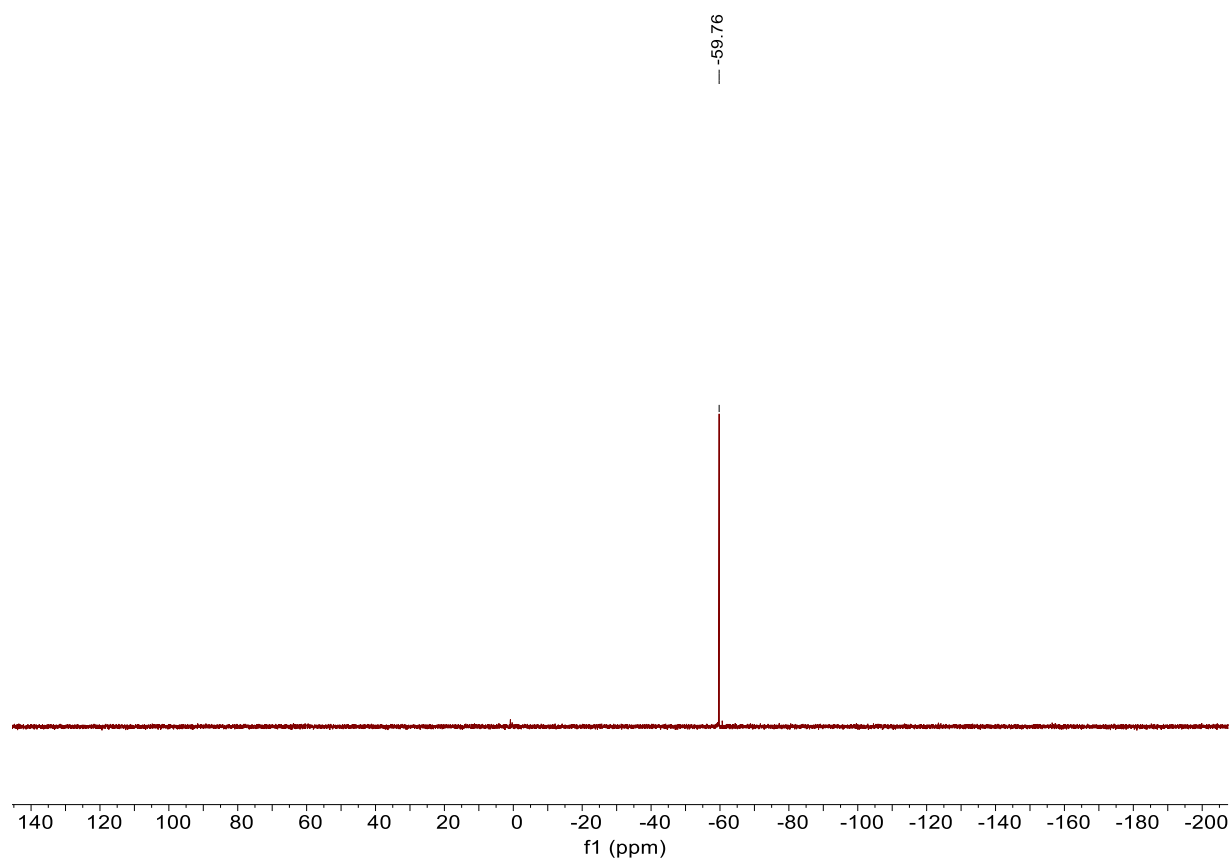

**Figure S8**  $^{31}\text{P}$  NMR of bisNHCP **3b** in  $\text{C}_6\text{D}_6$ .



## 1.4 Synthesis of BisNHCP SnCl<sub>2</sub> Complex 4a (NHC = IMes)

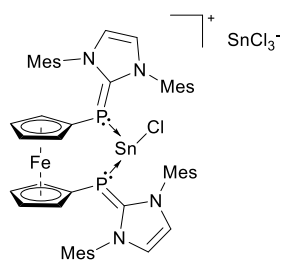

BisNHCP **3a** (30 mg, 35.1  $\mu\text{mol}$ , 1.0 eq) and SnCl<sub>2</sub>·dioxane (19.5 mg, 70.2  $\mu\text{mol}$ , 2.0 eq) were dissolved in toluene (1 mL) and stirred overnight. The precipitate was separated from the solution and dried under vacuum to yield the product as an orange solid (23 mg, 18.6  $\mu\text{mol}$ , 53%).

**<sup>1</sup>H NMR (400 MHz, THF-d<sub>8</sub>, 300K):**  $\delta$ [ppm] = 7.49 (s, 4H, NCH), 6.94 (s, 8H, C<sub>Mes</sub>H), 3.78 (s, 4H, C<sub>Cp</sub>H), 3.60 (s, 4H, C<sub>Cp</sub>H), 2.38 (s, 12H, *p*-C<sub>Mes</sub>CH<sub>3</sub>), 2.05 (s, 24H, *o*-C<sub>Mes</sub>CH<sub>3</sub>).

**<sup>13</sup>C (101 MHz, THF-d<sub>8</sub>, 300K)**  $\delta$ [ppm] = 158.95 (d, <sup>1</sup>J<sub>C,P</sub> = 34.2 Hz, C<sub>Carbene</sub>), 141.36 (*p*-C<sub>Mes</sub>CH<sub>3</sub>), 136.42 (NC<sub>Mes</sub>), 133.69 (*p*-C<sub>Mes</sub>CH<sub>3</sub>), 130.84 (C<sub>Mes</sub>H), 126.20 (NCH), 80.25 (m, C<sub>Cp</sub>H), 71.64 (m, C<sub>Cp</sub>H), 21.50 (*p*-C<sub>Mes</sub>CH<sub>3</sub>), 18.02 (*o*-C<sub>Mes</sub>CH<sub>3</sub>).

Impurities at 138.60 ppm, 129.84 ppm, 129.07 ppm, 126.05 ppm, and 21.39 ppm are from residual toluene.

**<sup>31</sup>P (162 Hz, THF-d<sub>8</sub>, 300K)**  $\delta$ [ppm] = -46.85 (s, satellites <sup>1</sup>J<sub>Sn,P</sub> = 1151 Hz)

**<sup>119</sup>Sn (112 Hz, THF-d<sub>8</sub>, 300K)**  $\delta$ [ppm] = 236.45 (SnCl), -21.11 (SnCl<sub>3</sub>).

**Elemental Analysis:** C<sub>52</sub>H<sub>56</sub>Cl<sub>4</sub>FeN<sub>4</sub>P<sub>2</sub>Sn<sub>2</sub>

Calculated [%]: C (50.61), H (4.57), N (4.54)

Observed [%]: C (49.84), H (4.78), N (3.79)

**LIFDI-MS:** Calculated for C<sub>52</sub>H<sub>53</sub>Cl<sub>2</sub>FeN<sub>4</sub>P<sub>2</sub>Sn: 1041.1494  
Observed: 1041.18906

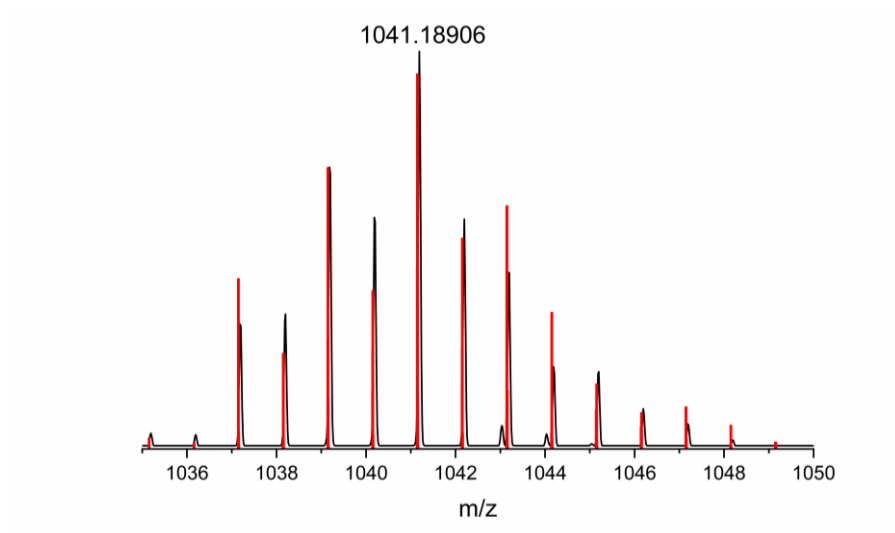

Figure S9 Measured (black) and calculated (red) LIFDI-MS for [4a-3H].

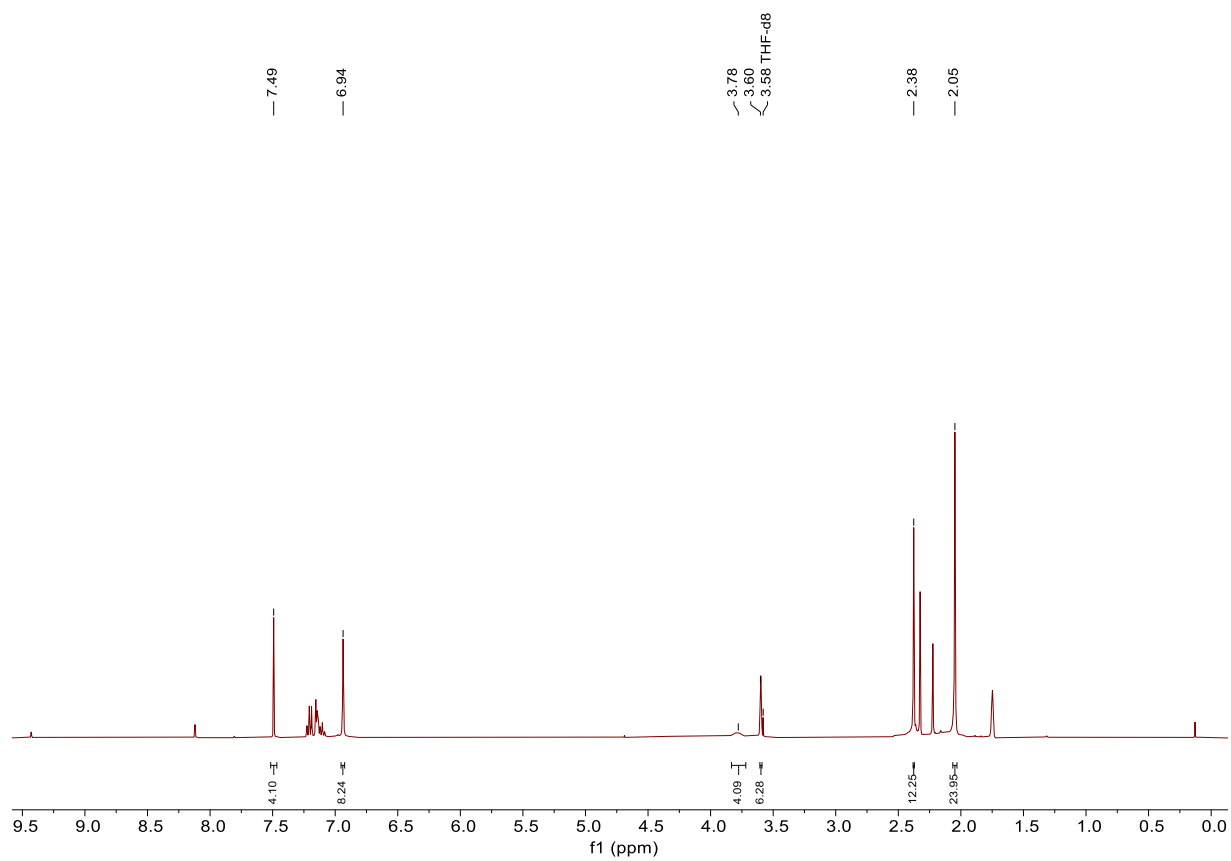

Figure S10  $^1\text{H}$  NMR of **4a** in THF- $d_8$ .

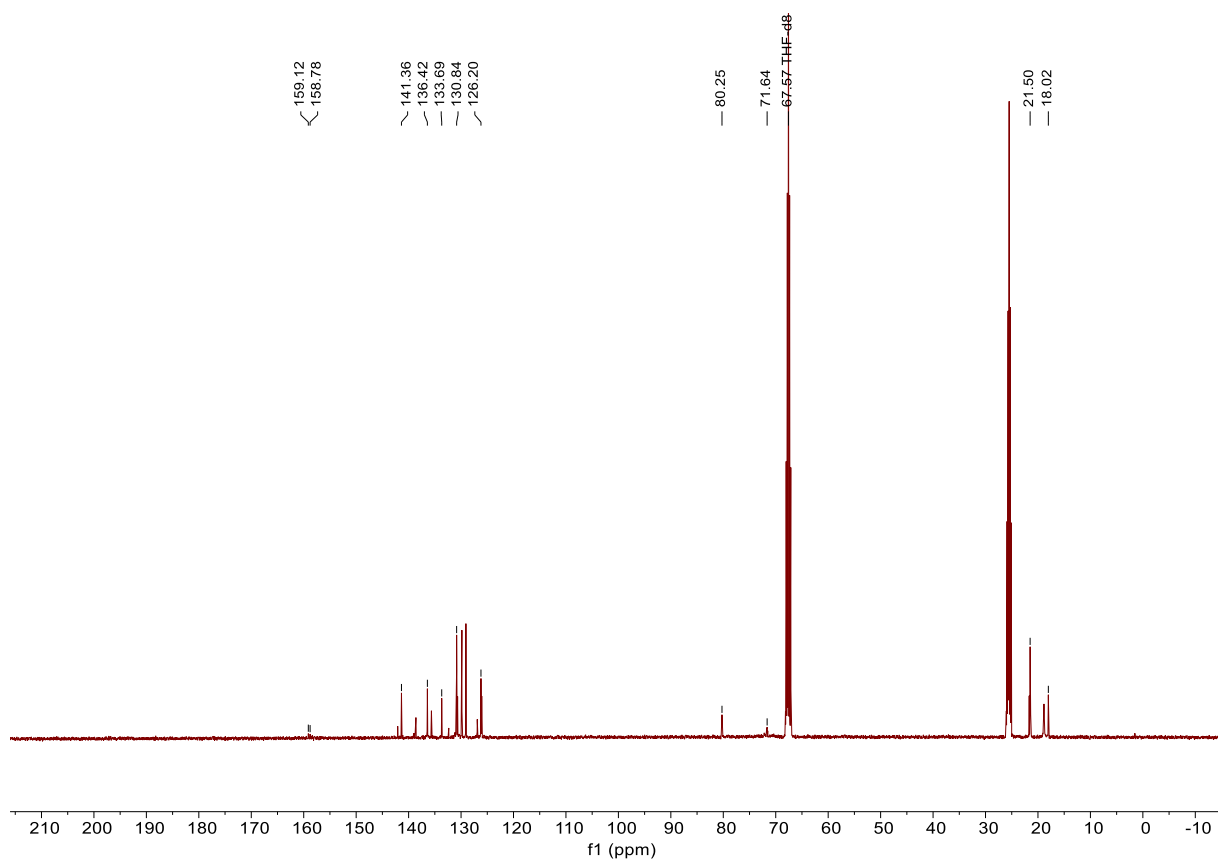

**Figure S11**  $^{13}\text{C}$  NMR of **4a** in  $\text{THF-d}_8$ .

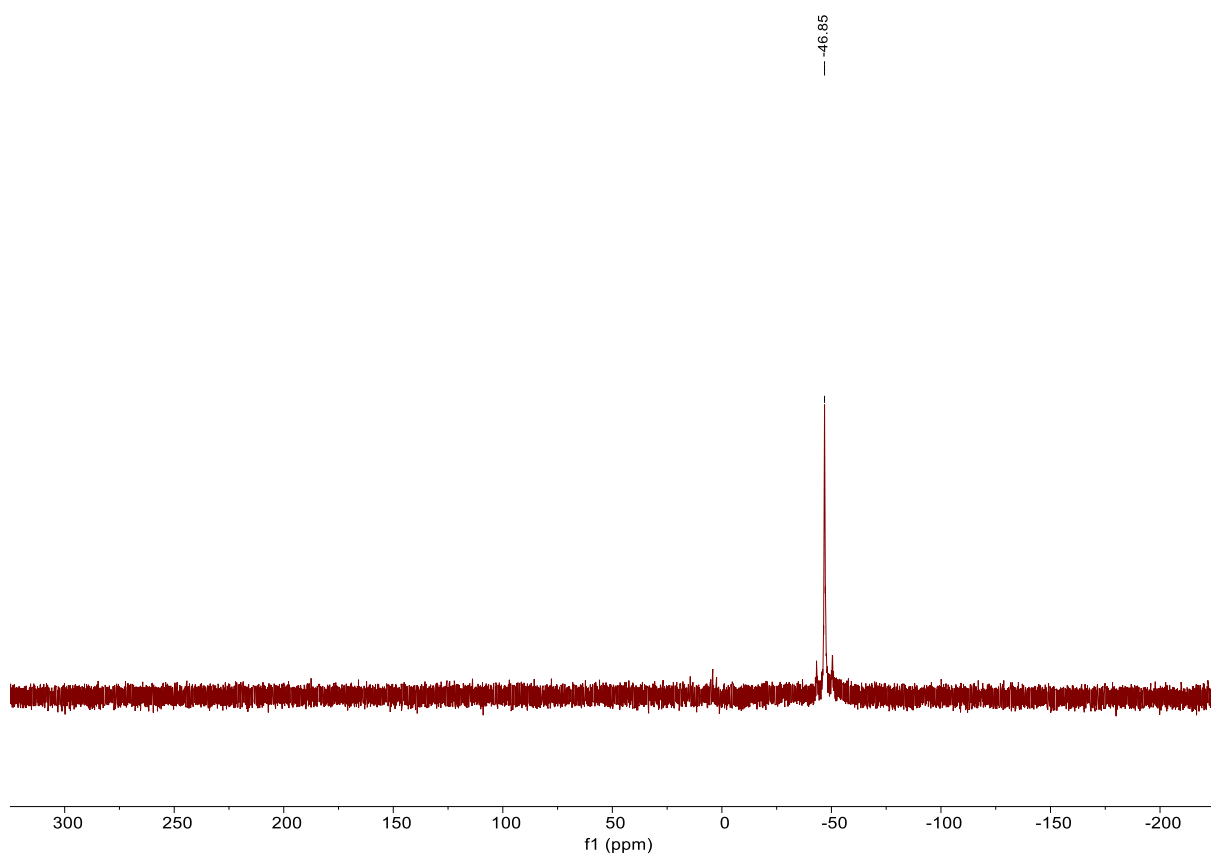

**Figure S12**  $^{31}\text{P}$  NMR of **4a** in  $\text{THF-d}_8$ .

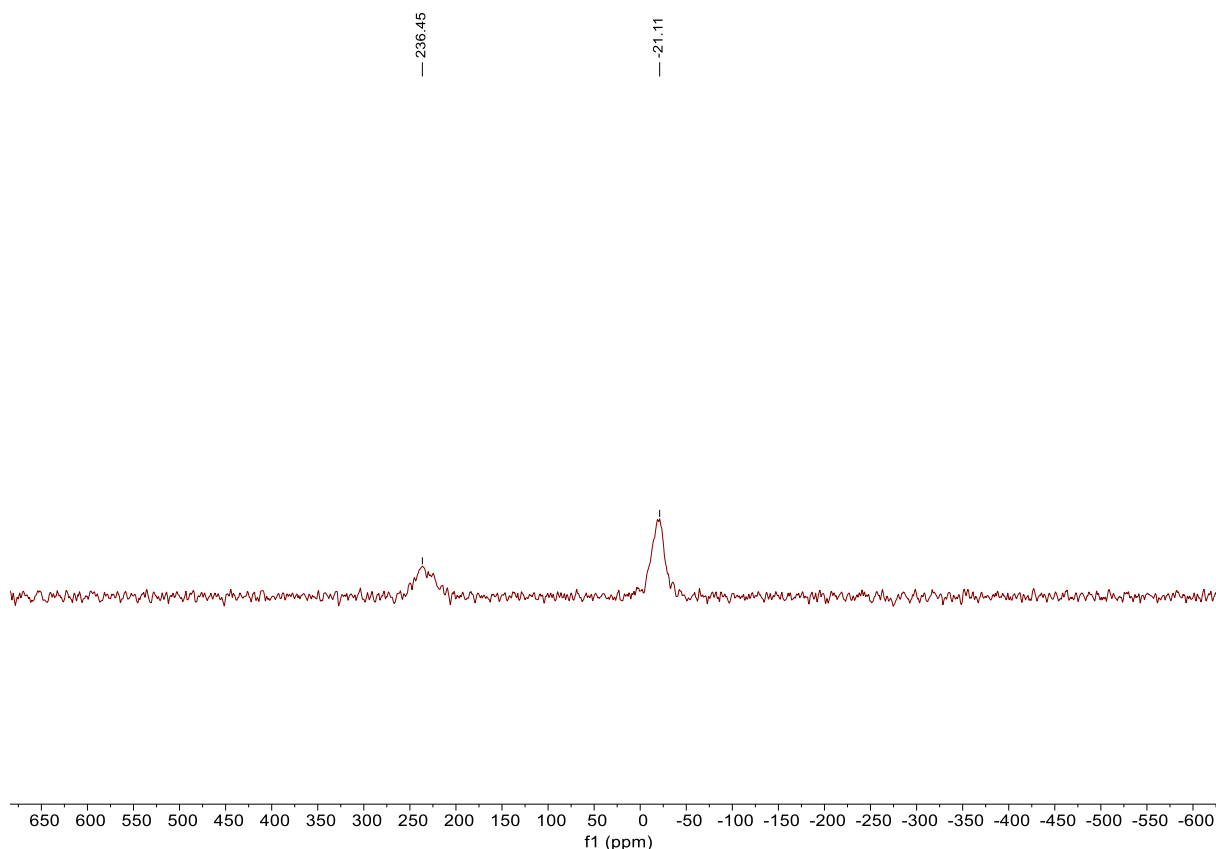

**Figure S13**  $^{119}\text{Sn}$  NMR of **4a** in THF- $d_8$ .

### 1.5 Synthesis of BisNHCP SnBr<sub>2</sub> Complex **4b** (NHC = IMes)

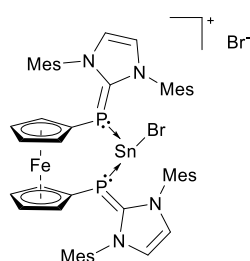

BisNHCP **3a** (20 mg, 23.4  $\mu\text{mol}$ , 1.0 eq) and  $\text{SnBr}_2$  (11.5 mg, 41.3  $\mu\text{mol}$ , 1.7 eq) were dissolved in benzene and stirred overnight. The precipitate was separated from the solution and dried under vacuum to yield the product as an orange solid (23 mg, 20.3  $\mu\text{mol}$ , 87%).

**$^1\text{H}$  NMR (400 MHz, THF- $d_8$ , 300K):**  $\delta$ [ppm] = 7.46 (s, 4H, NCH), 6.92 (s, 8H,  $\text{C}_{\text{Mes}}\text{H}$ ), 3.97 (s, 4H,  $\text{C}_{\text{Cp}}\text{H}$ ), 3.78 (s, 4H,  $\text{C}_{\text{Cp}}\text{H}$ ), 2.36 (s, 12H,  $p\text{-C}_{\text{Mes}}\text{CH}_3$ ), 2.05 (s, 24H,  $o\text{-C}_{\text{Mes}}\text{CH}_3$ ).

**$^{13}\text{C}$  (101 MHz, THF- $d_8$ , 300K)**  $\delta$ [ppm] = 141.39 ( $p\text{-C}_{\text{Mes}}\text{CH}_3$ ), 136.39 ( $\text{N}_{\text{C}_{\text{Mes}}}$ ), 133.66 ( $p\text{-C}_{\text{Mes}}\text{CH}_3$ ), 130.87 ( $\text{C}_{\text{Mes}}\text{H}$ ), 125.98 (NCH), 80.12 ( $\text{C}_{\text{Cp}}\text{H}$ ), 71.29 ( $\text{C}_{\text{Cp}}\text{H}$ ), 21.63 ( $p\text{-C}_{\text{Mes}}\text{CH}_3$ ), 18.98 ( $o\text{-C}_{\text{Mes}}\text{CH}_3$ ).

Shifts of carbon atoms directly bound to P were not observed in the  $^{13}\text{C}$  NMR spectrum.



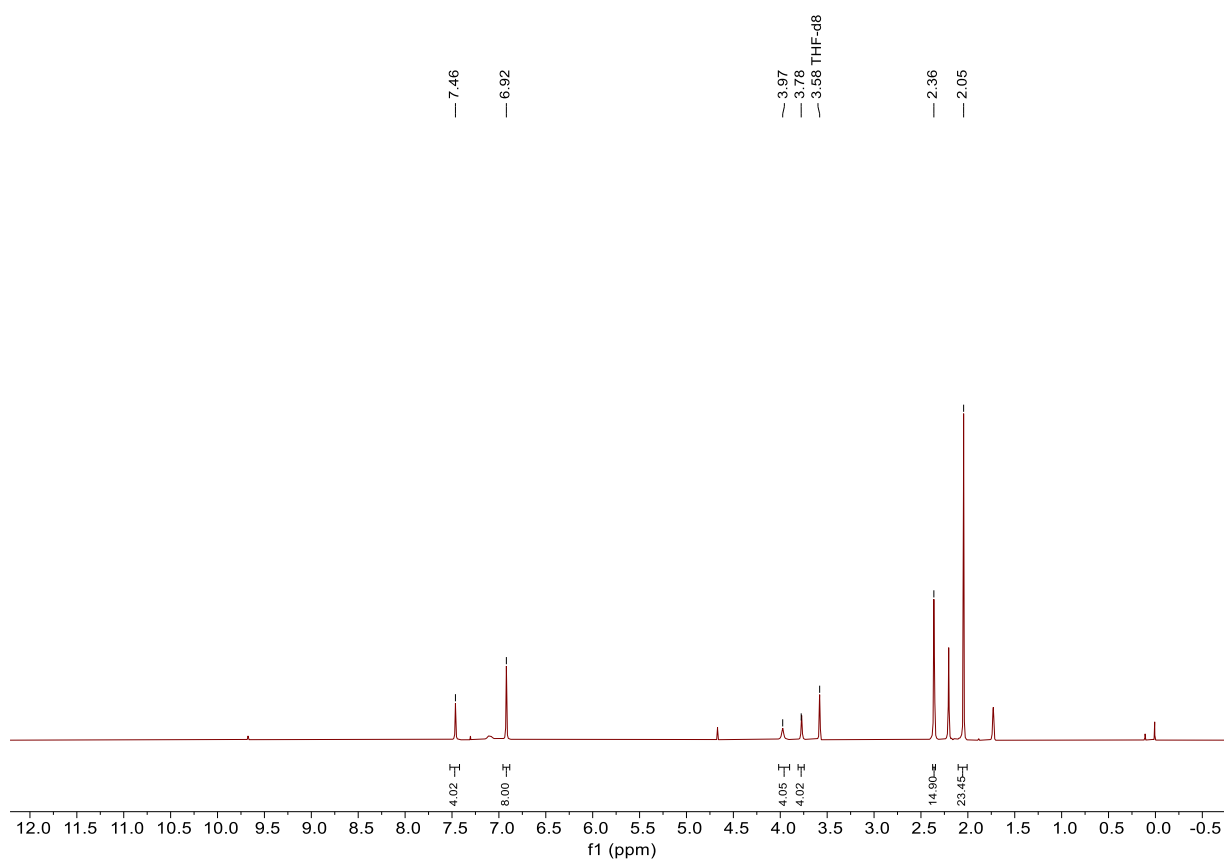

Figure S15  $^1\text{H}$  NMR of **4b** in  $\text{THF-d}_8$ .

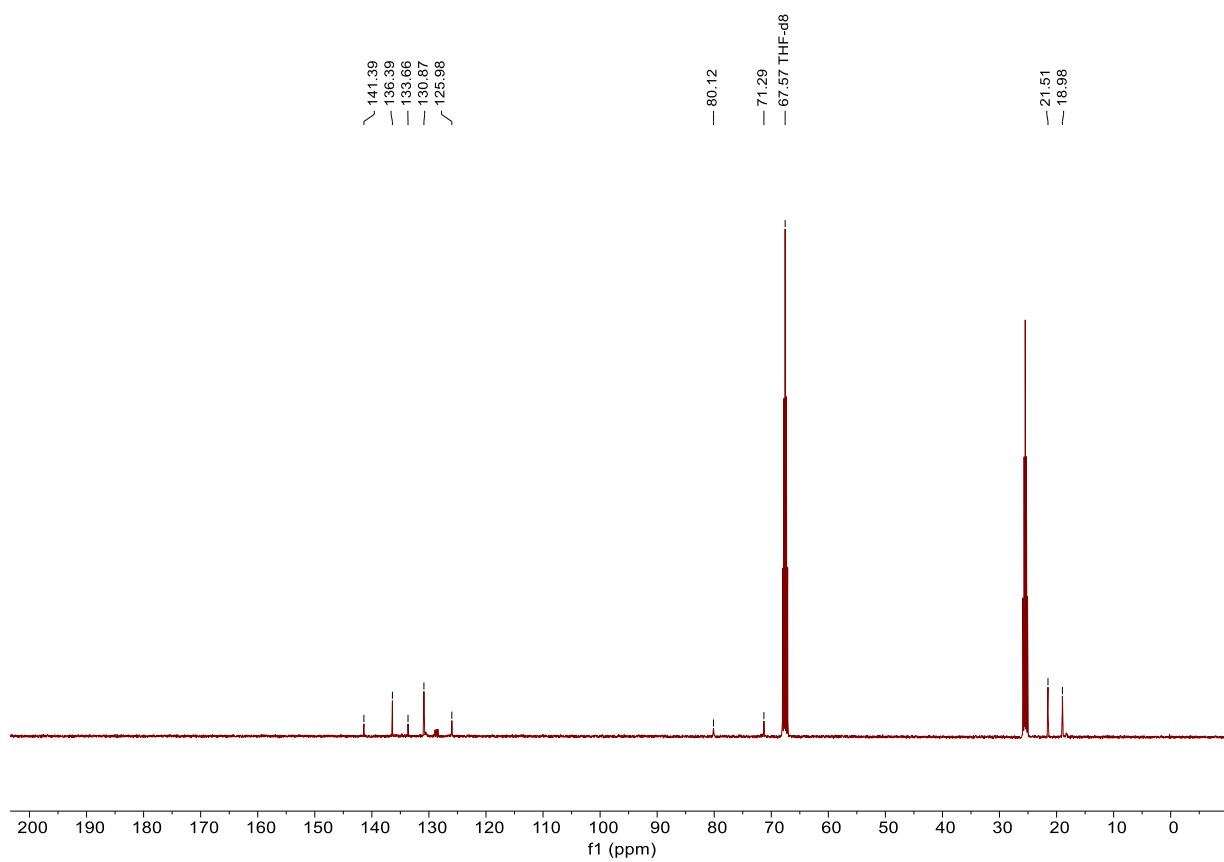

Figure S16  $^{13}\text{C}$  NMR of **4b** in  $\text{THF-d}_8$ .

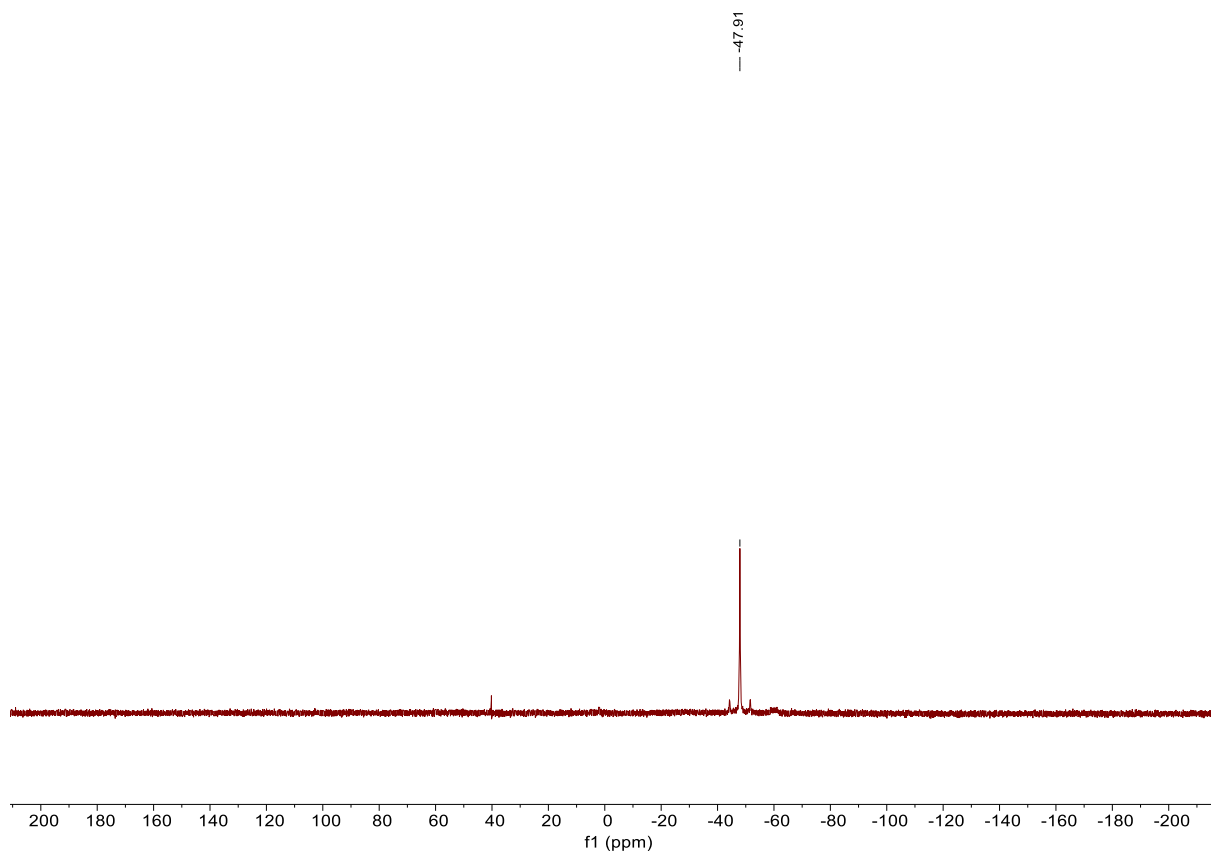

**Figure S17**  $^{31}\text{P}$  NMR of **4b** in THF- $d_8$ .

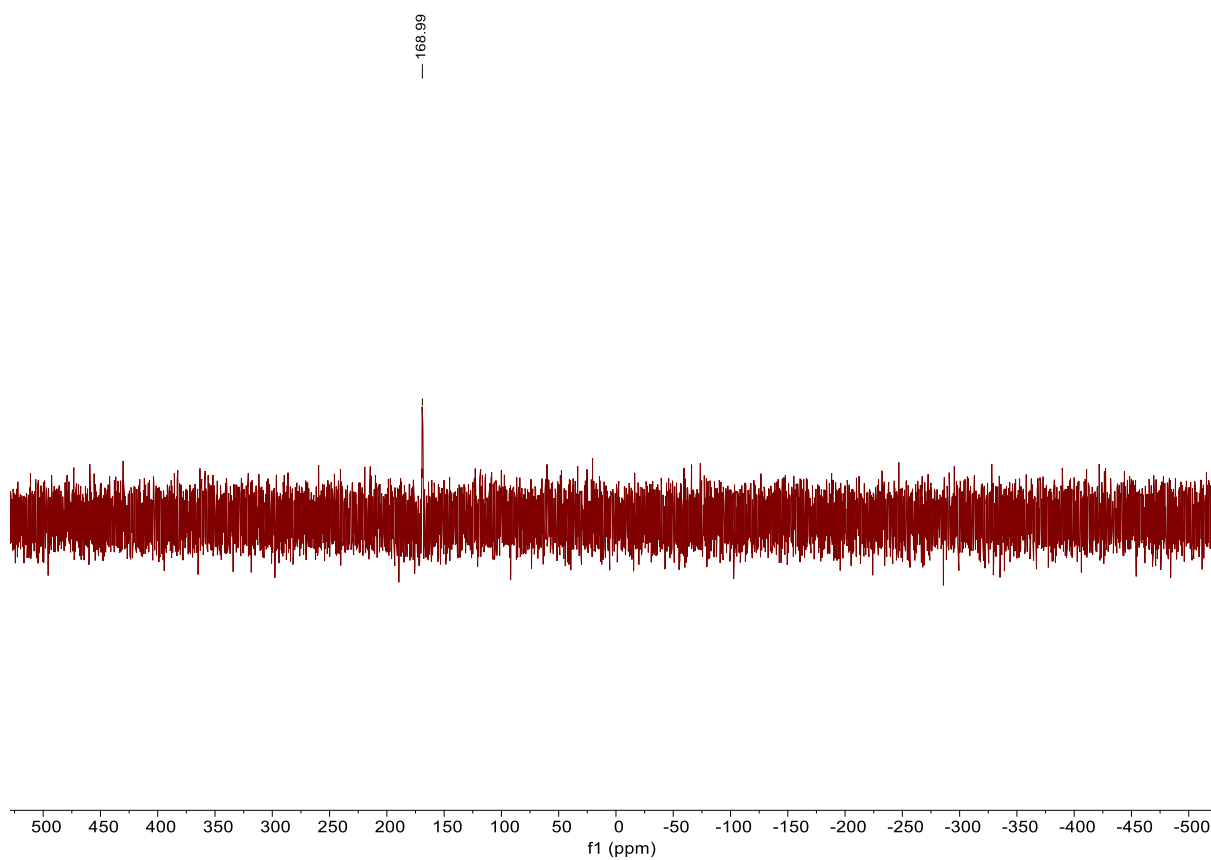

**Figure S18**  $^{119}\text{Sn}$  NMR of **4b** in THF- $d_8$ .

## 1.6 Synthesis of BisNHCP SnI<sub>2</sub> Complex 4c (NHC = IMes)

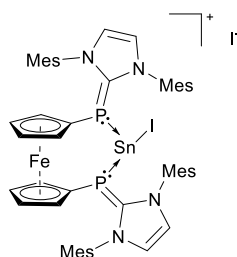

BisNHCP **3a** (11.8 mg, 13.80  $\mu\text{mol}$ , 1.0 eq) and  $\text{SnI}_2$  (5.1 mg, 13.80  $\mu\text{mol}$ , 1.0 eq) were dissolved in toluene (1 mL) and stirred overnight. The precipitate was separated from the solution and dried under vacuum to yield the product as an orange solid (15.2 mg, 12.38  $\mu\text{mol}$ , 90%).

**<sup>1</sup>H NMR (400 MHz, THF-d<sub>8</sub>, 300K):**  $\delta$ [ppm] = 7.41 (s, 4H, NCH), 6.89 (s, 8H, C<sub>Mes</sub>H), 4.21 (s, 4H, C<sub>Cp</sub>H), 3.71 (s, 4H, C<sub>Cp</sub>H), 2.34 (s, 12H, *p*-C<sub>Mes</sub>CH<sub>3</sub>), 2.13 (s, 24H, *o*-C<sub>Mes</sub>CH<sub>3</sub>).

**<sup>13</sup>C (101 MHz, THF-d<sub>8</sub>, 300K)**  $\delta$ [ppm] = 140.97 (*p*-C<sub>Mes</sub>CH<sub>3</sub>), 136.52 (NC<sub>Mes</sub>), 133.68 (*p*-C<sub>Mes</sub>CH<sub>3</sub>), 130.90 (C<sub>Mes</sub>H), 125.67 (NCH), 80.05 (C<sub>Cp</sub>H), 71.08 (C<sub>Cp</sub>H), 21.52 (*p*-C<sub>Mes</sub>CH<sub>3</sub>), 19.68 (*o*-C<sub>Mes</sub>CH<sub>3</sub>).

Shifts of carbon atoms directly bound to P were not observed in the <sup>13</sup>C NMR spectrum.

**<sup>31</sup>P (162 Hz, THF-d<sub>8</sub>, 300K)**  $\delta$ [ppm] = -49.89 (s, satellites <sup>1</sup>J<sub>119Sn,P</sub> = 1211 Hz, <sup>1</sup>J<sub>117Sn,P</sub> = 1268 Hz)

**<sup>119</sup>Sn (149 Hz, THF-d<sub>8</sub>, 300K)**  $\delta$ [ppm] = 174.43 (t, <sup>1</sup>J<sub>Sn,P</sub> = 1301 Hz)

**LIFDI-MS:** Calculated for [C<sub>52</sub>H<sub>56</sub>FeIN<sub>4</sub>P<sub>2</sub>Sn]<sup>+</sup>: 1101.13964

Observed: 1101.12756

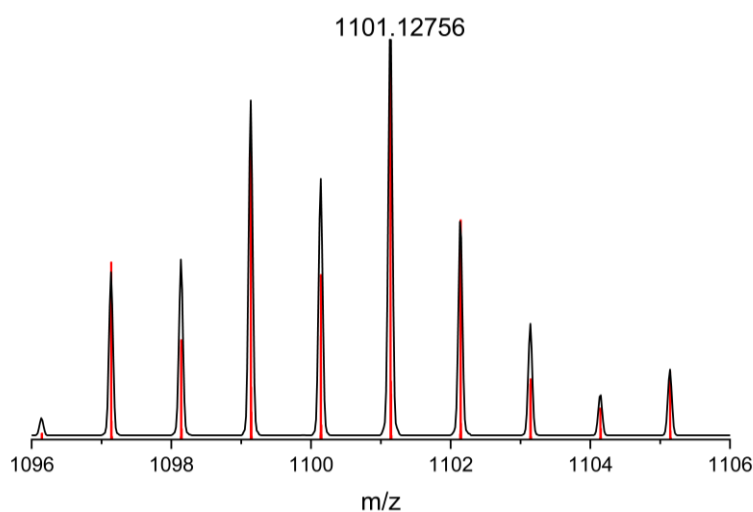

**Figure S19** Measured (black) and calculated (red) LIFDI-MS for [4c-I]<sup>+</sup>.



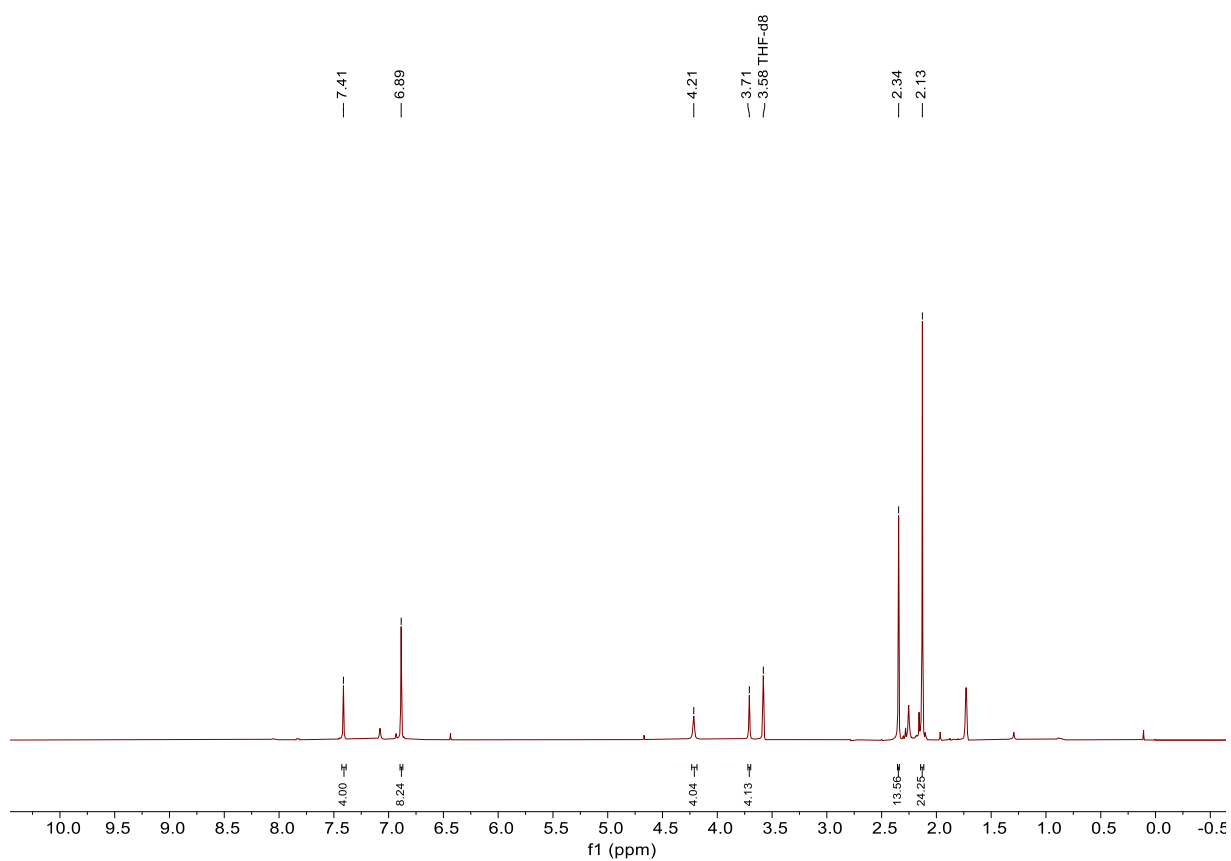

Figure S20  $^1\text{H}$  NMR of **4c** in THF- $d_8$ .

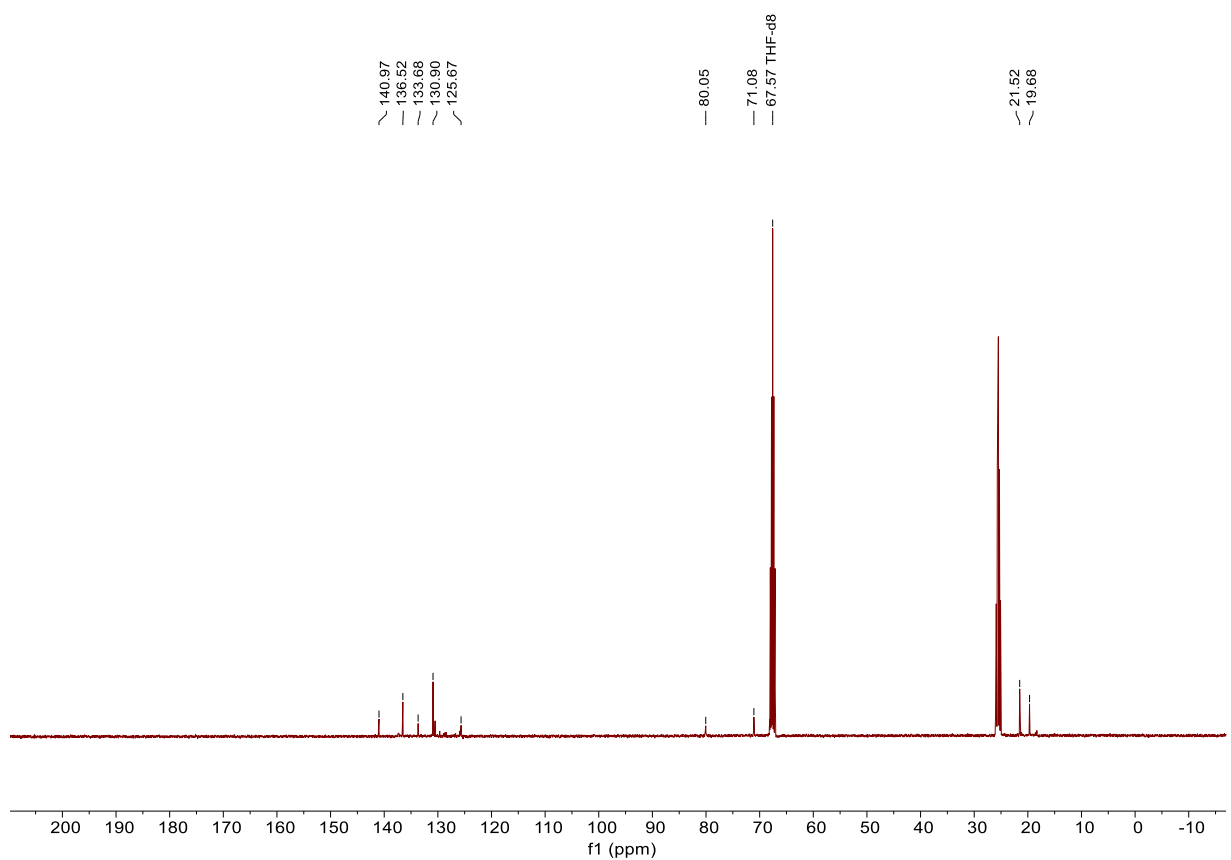

Figure S21  $^{13}\text{C}$  NMR of **4c** in THF- $d_8$ .

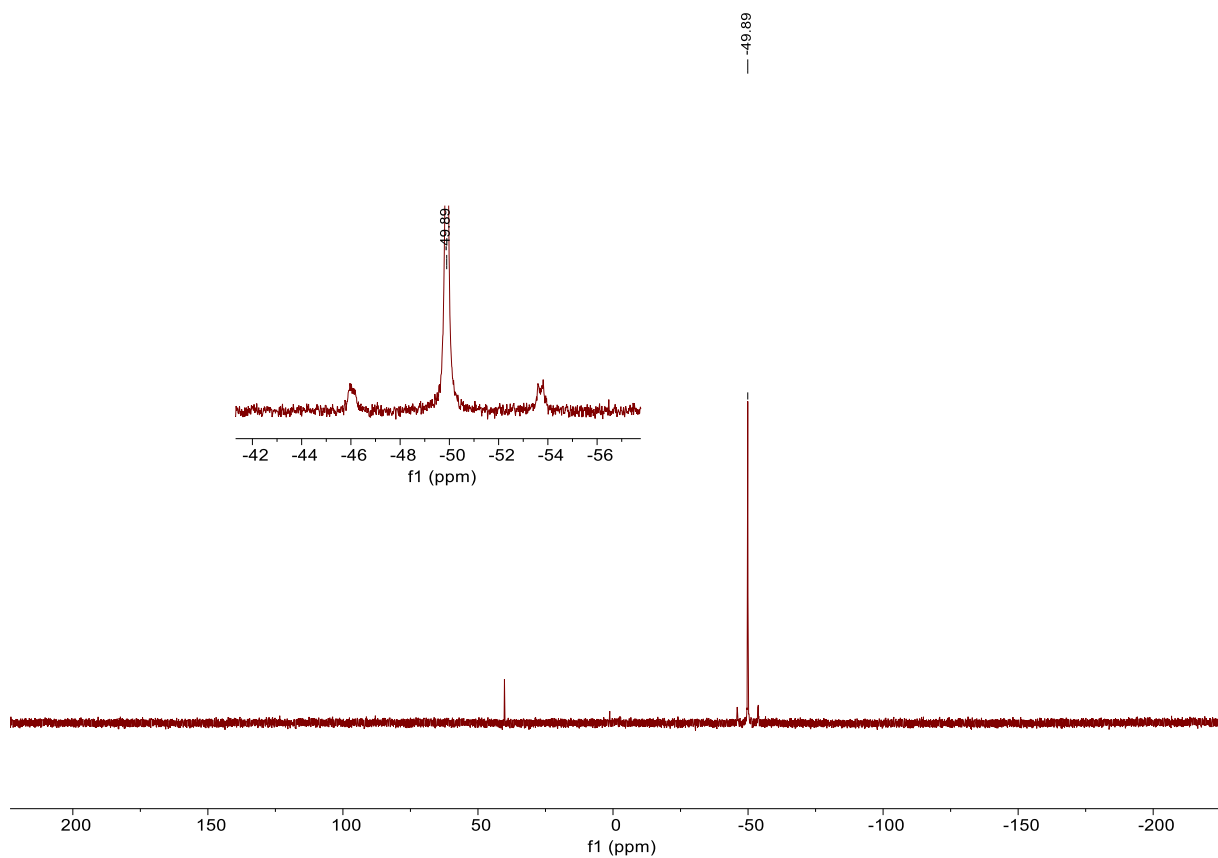

**Figure S22** <sup>31</sup>P NMR of **4c** in THF-d<sub>8</sub>.

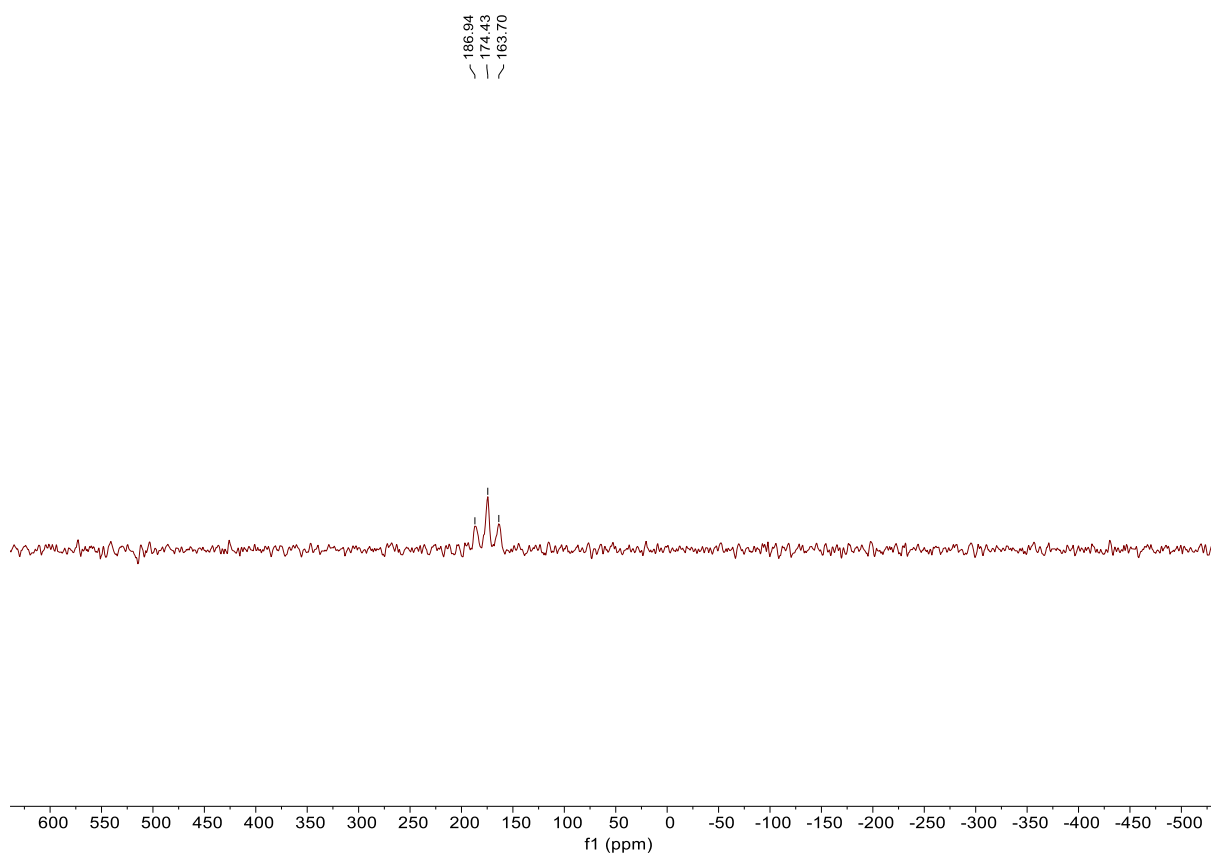

**Figure S23** <sup>119</sup>Sn NMR of **4c** in THF-d<sub>8</sub>.

## 1.7 Synthesis of BisNHCP Sn(OTf)<sub>2</sub> Complex 4d (NHC = IMes)

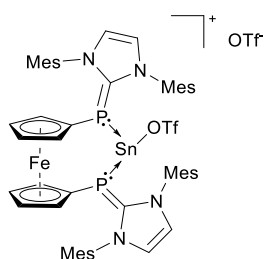

BisNHCP **3a** (20 mg, 23.4  $\mu\text{mol}$ , 1.0 eq) and  $\text{Sn}(\text{OTf})_2 \cdot \text{dioxane}$  (11.8 mg, 23.4  $\mu\text{mol}$ , 1.0 eq) were dissolved in toluene (1 mL) and stirred overnight. The precipitate was separated from the solution and dried under vacuum to yield the product as an orange solid (23 mg, 18.1  $\mu\text{mol}$ , 77%).

**<sup>1</sup>H NMR (400 MHz, THF-d<sub>8</sub>, 300K):**  $\delta$ [ppm] = 7.53 (s, 4H, NCH), 6.95 (s, 8H, C<sub>Mes</sub>H), 3.86 (s, 4H, C<sub>Cp</sub>H), 3.82 (s, 4H, C<sub>Cp</sub>H), 2.38 (s, 12H, *p*-C<sub>Mes</sub>CH<sub>3</sub>), 2.01 (s, 24H, *o*-C<sub>Mes</sub>CH<sub>3</sub>).

Impurities at 7.19 ppm (m), 7.11 ppm (m), and 2.31 ppm (s) are from residual toluene.

**<sup>13</sup>C (101 MHz, THF-d<sub>8</sub>, 300K)**  $\delta$ [ppm] = 141.67 (*p*-C<sub>Mes</sub>CH<sub>3</sub>), 136.41 (NC<sub>Mes</sub>), 135.63 (*p*-C<sub>Mes</sub>CH<sub>3</sub>), 131.12 (C<sub>Mes</sub>H), 126.49 (NCH), 80.61 (m, C<sub>Cp</sub>H), 71.99 (C<sub>Cp</sub>H), 18.51 (*p*-C<sub>Mes</sub>CH<sub>3</sub>), 17.65 (*o*-C<sub>Mes</sub>CH<sub>3</sub>).

Impurities at 138.61 ppm, 130.53 ppm, 129.84 ppm, 129.07 ppm, and 21.48 ppm are from residual toluene. Shifts of carbon atoms directly bound to P were not observed in the <sup>13</sup>C NMR spectrum.

**<sup>31</sup>P (162 Hz, THF-d<sub>8</sub>, 300K)**  $\delta$ [ppm] = -29.76 (s, satellites <sup>1</sup>J<sub>119Sn,P</sub> = 1202 Hz, <sup>1</sup>J<sub>117Sn,P</sub> = 1255 Hz)

**<sup>19</sup>F (376 Hz, THF-d<sub>8</sub>, 300K)**  $\delta$ [ppm] = -78.72

**<sup>119</sup>Sn (149 Hz, THF-d<sub>8</sub>, 300K)**  $\delta$ [ppm] = 432.78 (t, <sup>1</sup>J<sub>Sn,P</sub> = 1249 Hz)

**Elemental Analysis:** C<sub>54</sub>H<sub>56</sub>F<sub>6</sub>FeN<sub>4</sub>O<sub>6</sub>P<sub>2</sub>S<sub>2</sub>Sn

Calculated [%]: C (51.00), H (4.44), N (4.41), S (5.04)

Observed [%]: C (51.87), H (4.98), N (4.10), S (4.46)

**LIFDI-MS:** Calculated for [C<sub>53</sub>H<sub>56</sub>F<sub>3</sub>FeN<sub>4</sub>O<sub>3</sub>P<sub>2</sub>SSn]<sup>+</sup>: 1123.18719

Observed: 1123.18977

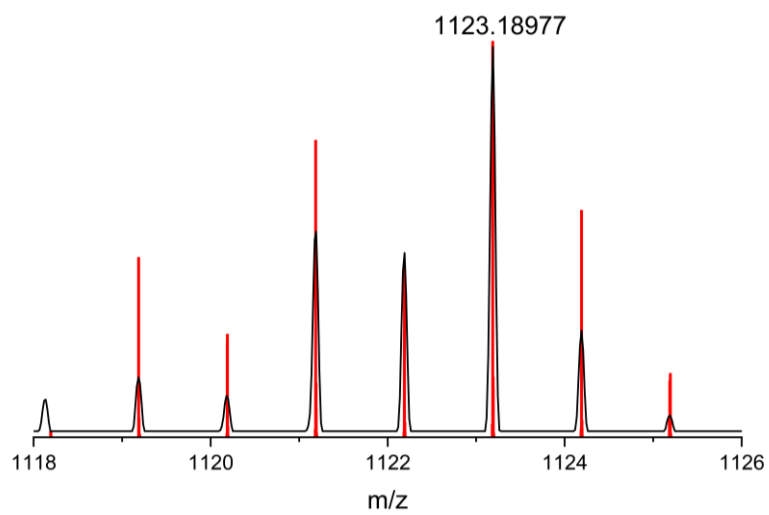

**Figure S24** Measured (black) and calculated (red) LIFDI-MS for  $[4d-OTf]^+$ .

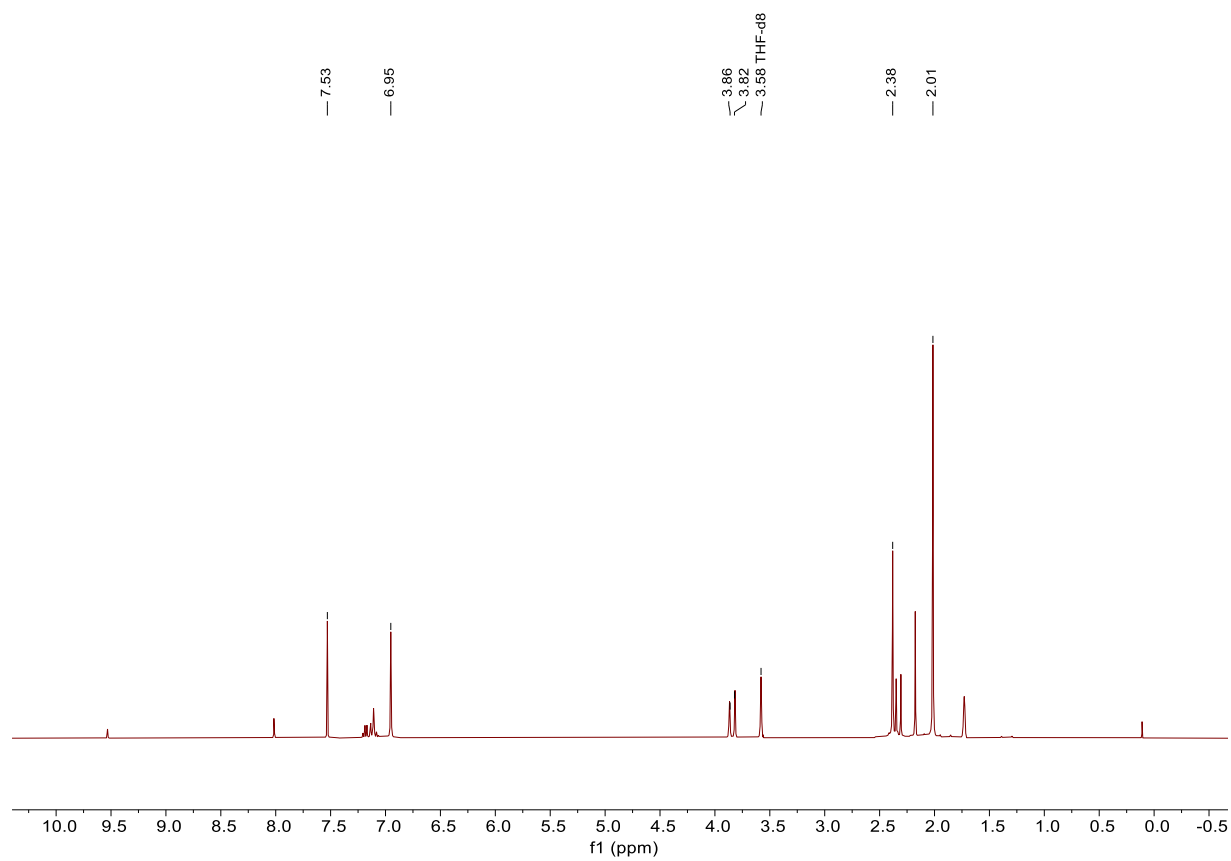

**Figure S25**  $^1H$  NMR of **4d** in  $THF-d_8$ .

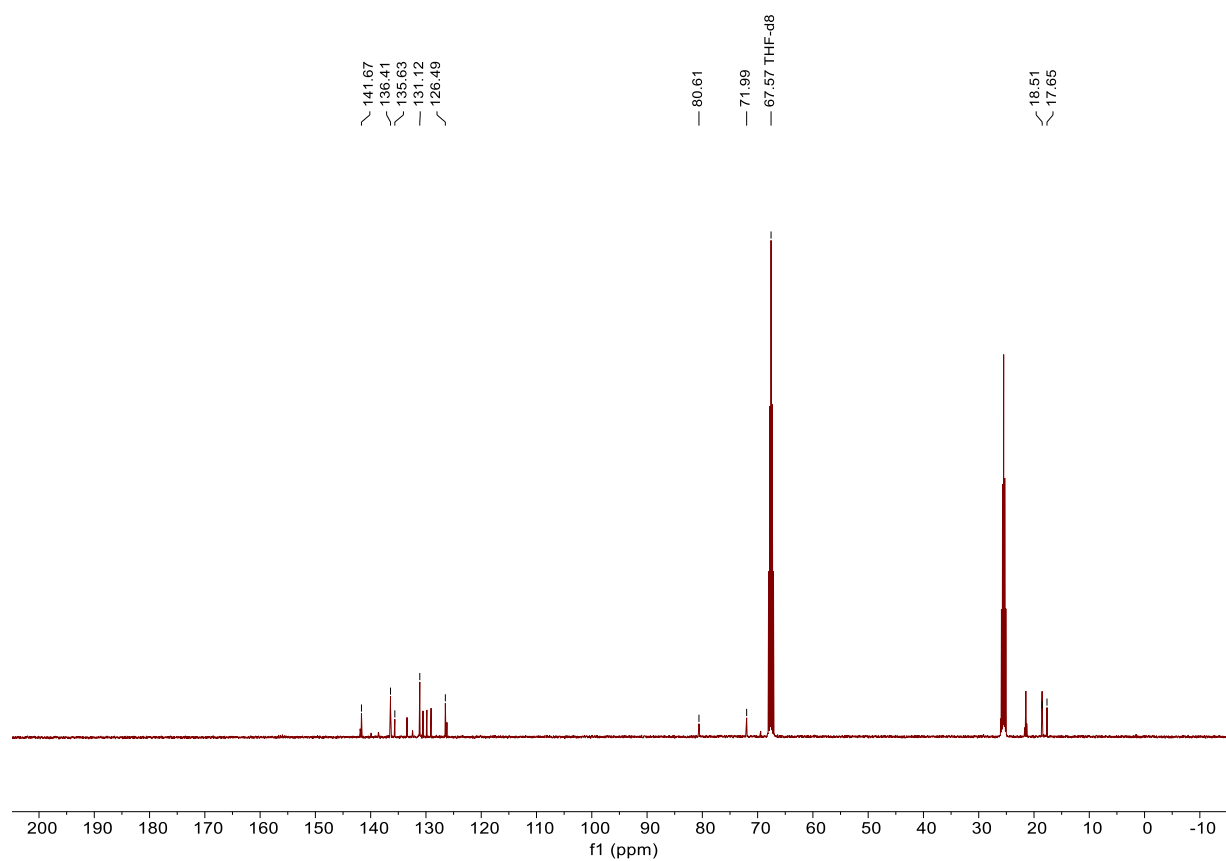

**Figure S26** <sup>13</sup>C NMR of **4d** in THF-d<sub>8</sub>.

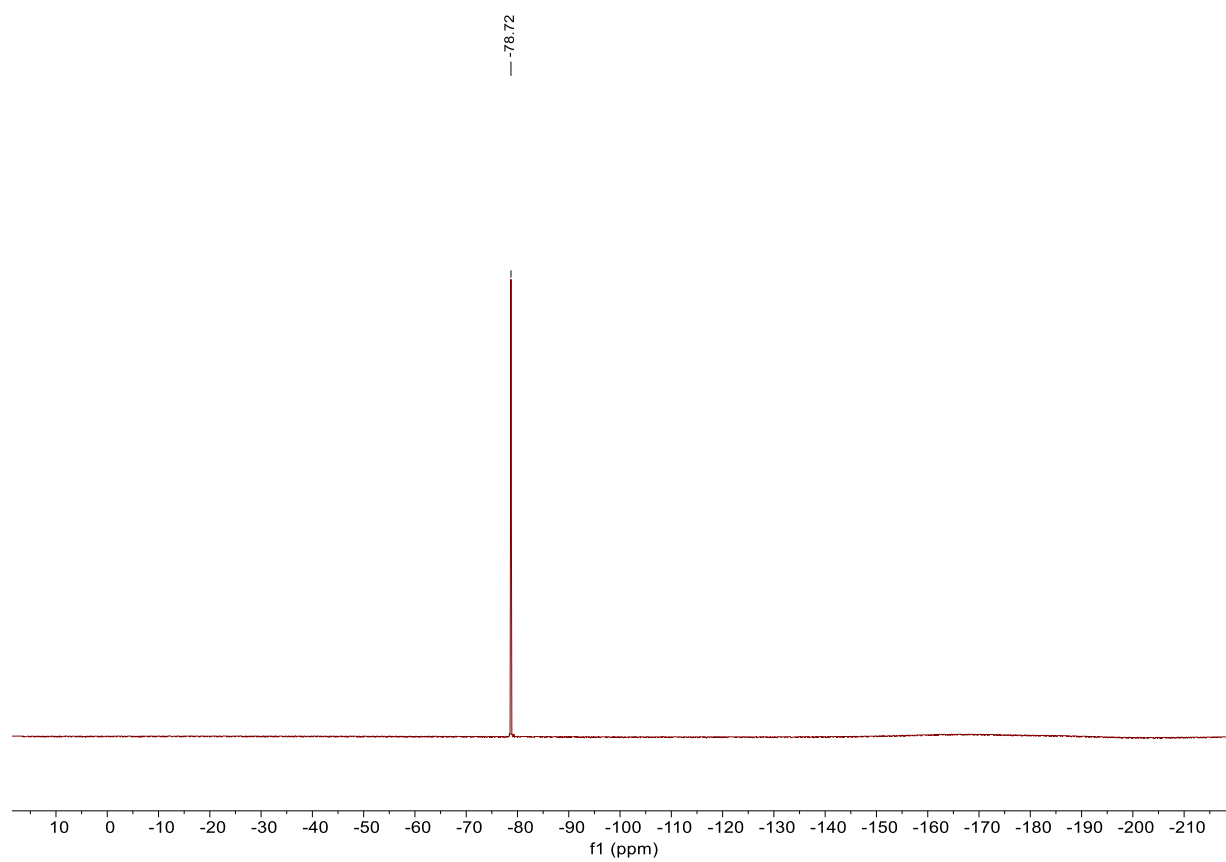

**Figure S27** <sup>19</sup>F NMR of **4d** in THF-d<sub>8</sub>.

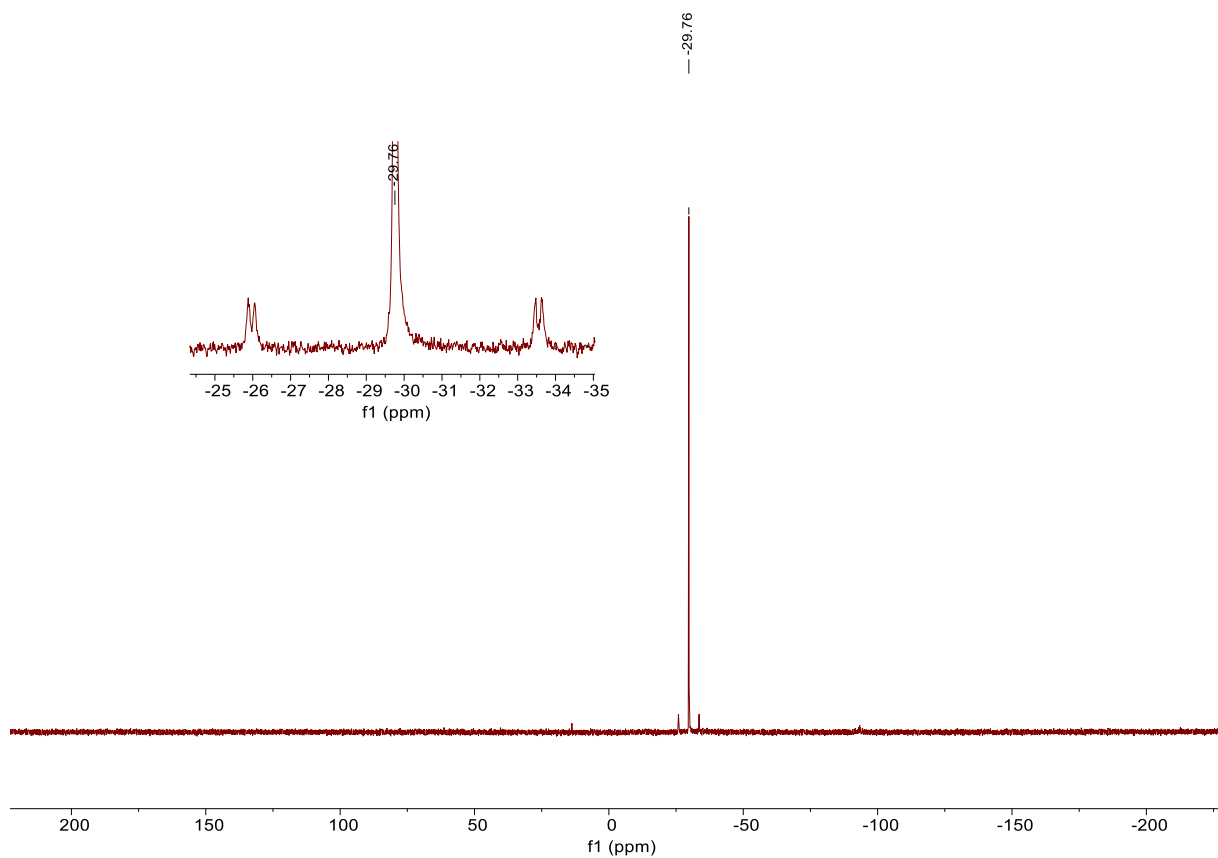

**Figure S28**  $^{31}\text{P}$  NMR of **4d** in  $\text{THF-d}_8$ .

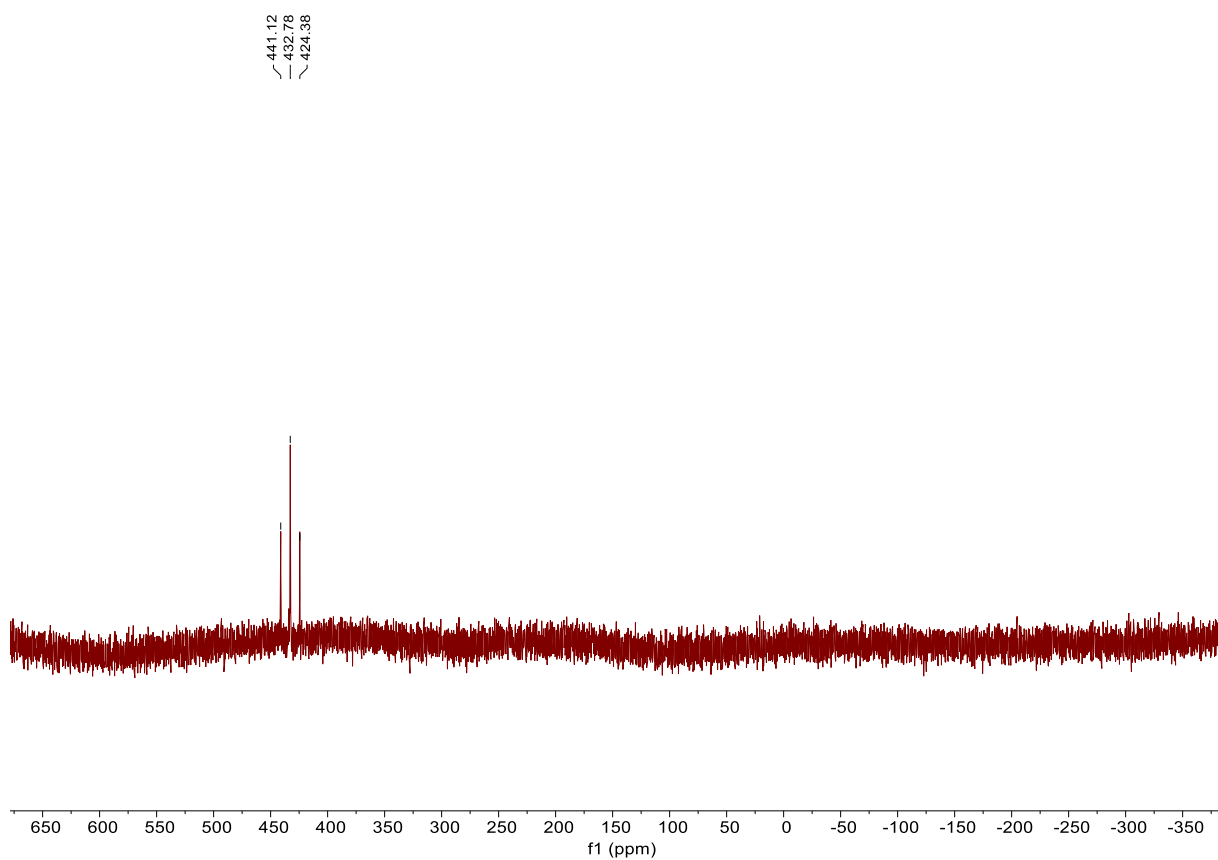

**Figure S29**  $^{119}\text{Sn}$  NMR of **4d** in  $\text{THF-d}_8$ .

## 1.8 Synthesis of BisNHCP SnCl<sub>2</sub> Complex 5a (NHC = <sup>Me</sup>IMes)

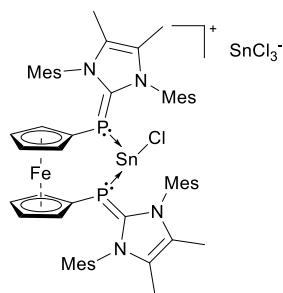

BisNHCP **3b** (30 mg, 32.93  $\mu\text{mol}$ , 1.0 eq) and SnCl<sub>2</sub>·dioxane (18.3 mg, 65.87  $\mu\text{mol}$ , 1.0 eq) were dissolved in toluene (1 mL) and stirred overnight. The precipitate was separated from the solution and dried under vacuum to yield the product as an orange solid (29.9 mg, 23.28  $\mu\text{mol}$ , 70%).

**<sup>1</sup>H NMR (400 MHz, THF-d<sub>8</sub>, 300K)**:  $\delta$ [ppm] = 6.98 (s, 8H, C<sub>Mes</sub>H), 3.80 (s, 4H, C<sub>Cp</sub>H), 3.60 (s, 4H, C<sub>Cp</sub>H), 2.39 (s, 12H, *p*-C<sub>Mes</sub>CH<sub>3</sub>), 1.97 (s, 24H, *o*-C<sub>Mes</sub>CH<sub>3</sub>), 1.86 (NCCH<sub>3</sub>).

**<sup>13</sup>C (101 MHz, THF-d<sub>8</sub>, 300K)**  $\delta$ [ppm] = 156.06 (d, <sup>1</sup>J<sub>C,P</sub> = 33.6 Hz, C<sub>carbene</sub>P), 155.64 (d, <sup>1</sup>J<sub>C,P</sub> = 33.8 Hz, C<sub>carbene</sub>P) 141.37 (*p*-C<sub>Mes</sub>CH<sub>3</sub>), 136.79 (NC<sub>Mes</sub>), 131.84 (NCCH<sub>3</sub>), 131.08 (*o*-C<sub>Mes</sub>CH<sub>3</sub>), 129.01 (C<sub>Mes</sub>H), 80.22 (m, C<sub>Cp</sub>H), 72.58 (m, C<sub>Cp</sub>H), 71.58 (broad s, C<sub>Cp</sub>P), 21.55 (*p*-C<sub>Mes</sub>CH<sub>3</sub>), 18.75 (*o*-C<sub>Mes</sub>CH<sub>3</sub>), 9.35 (NCCH<sub>3</sub>).

**<sup>31</sup>P (162 Hz, THF-d<sub>8</sub>, 300K)**  $\delta$ [ppm] = -49.27 (s, satellites <sup>1</sup>J<sub>Sn,P</sub> = 1116 Hz)

**<sup>119</sup>Sn (149 Hz, THF-d<sub>8</sub>, 300K)**  $\delta$ [ppm] = 243.75 (SnCl), -27.39 (SnCl<sub>3</sub>)

**Elemental Analysis:** C<sub>56</sub>H<sub>64</sub>Cl<sub>4</sub>FeN<sub>4</sub>P<sub>2</sub>Sn<sub>2</sub>

Calculated [%]: C (52.13), H (5.00), N (4.34)

Observed [%]: C (50.71), H (5.18), N (3.86)

**LIFDI-MS:** Calculated for [C<sub>56</sub>H<sub>64</sub>ClFeN<sub>4</sub>P<sub>2</sub>Sn]<sup>+</sup>: 1065.26661

Observed: 1065.26677

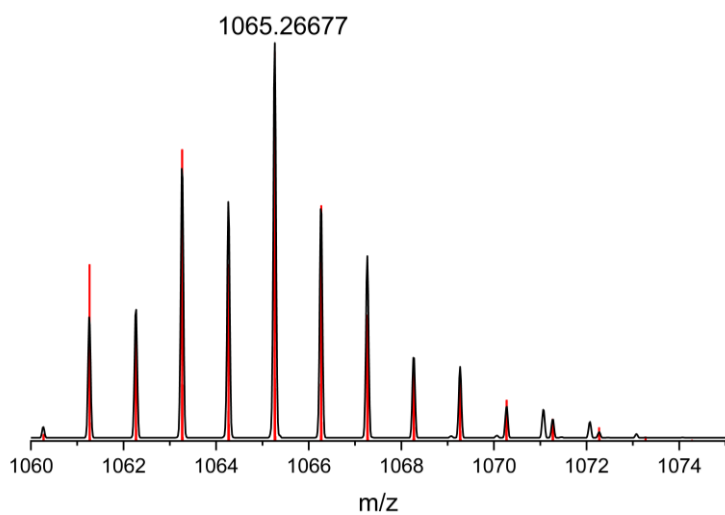

**Figure S30** Measured (black) and calculated (red) LIFDI-MS for  $[5a-SnCl_3]^+$ .

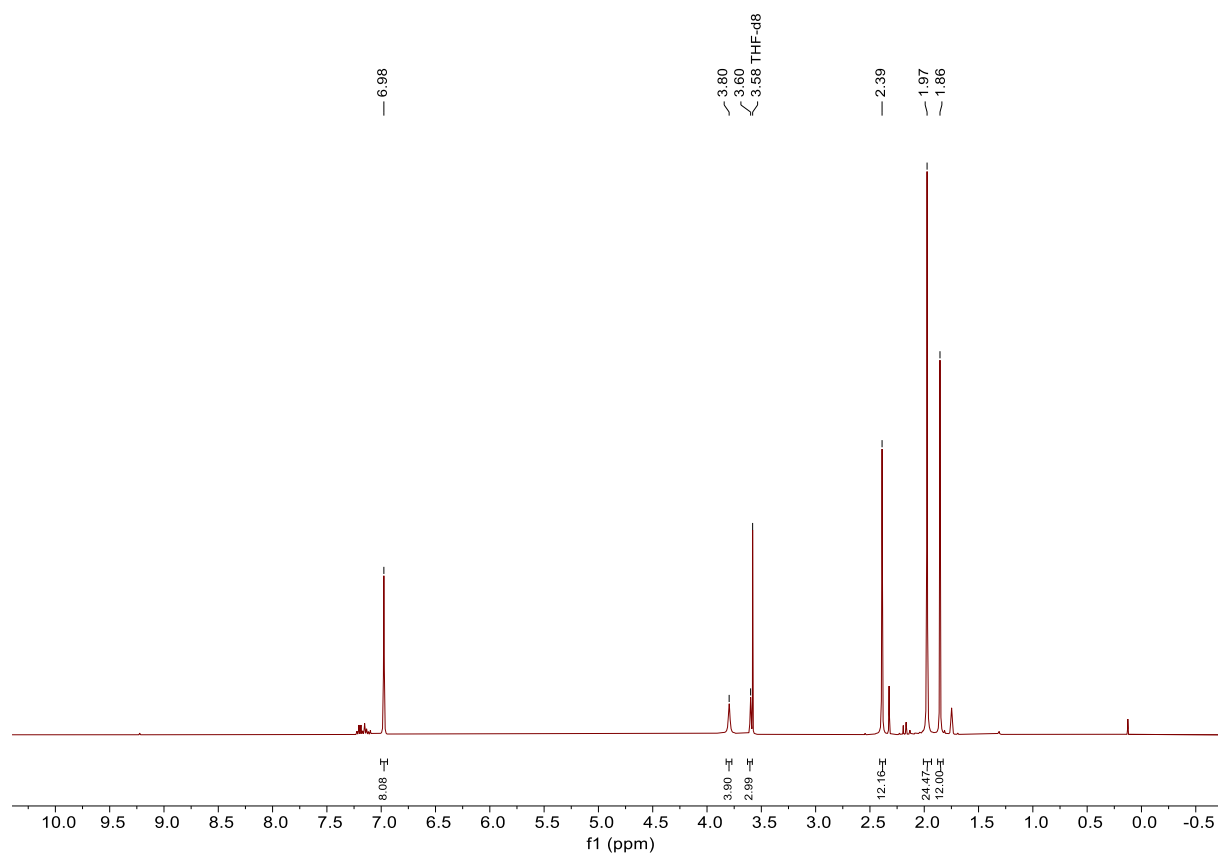

**Figure S31**  $^1H$  NMR of **5a** in  $THF-d_8$ .



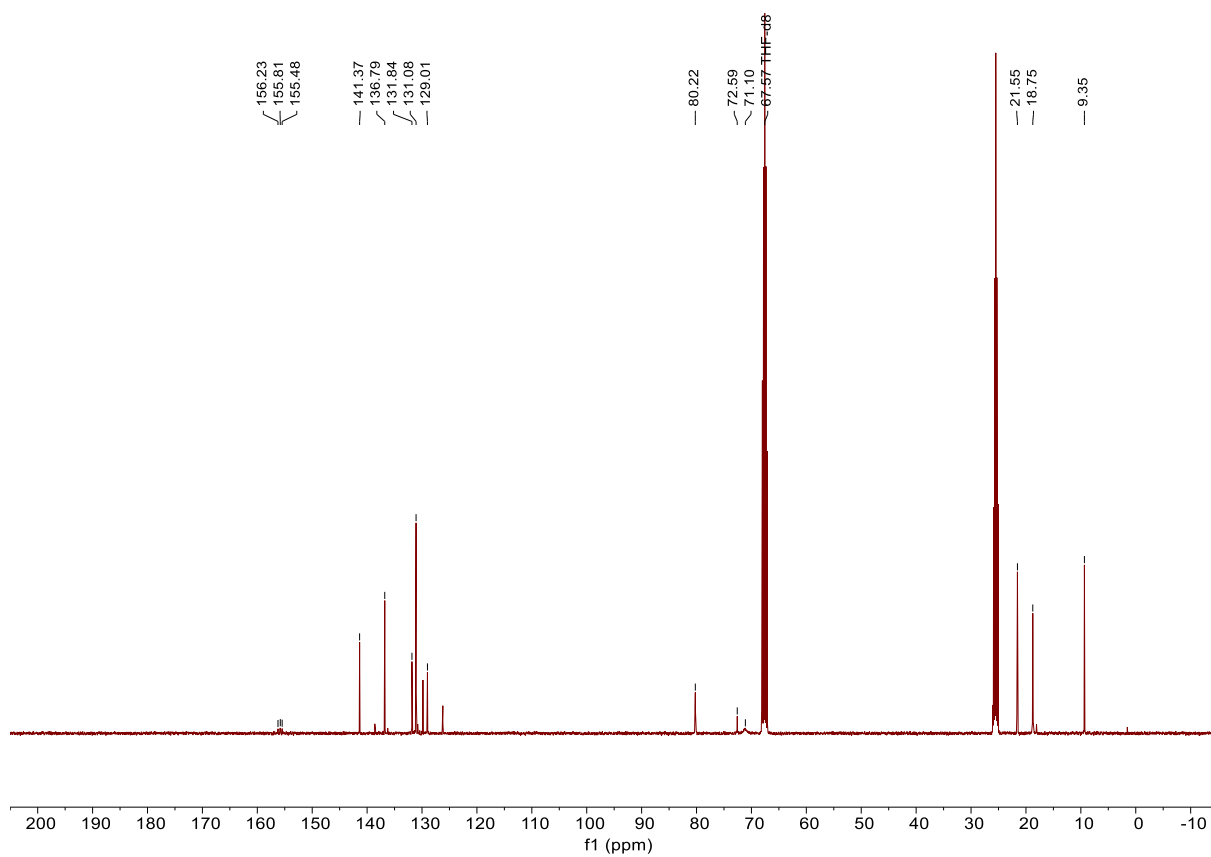

Figure S32 <sup>13</sup>C NMR of 5a in THF-d<sub>8</sub>.

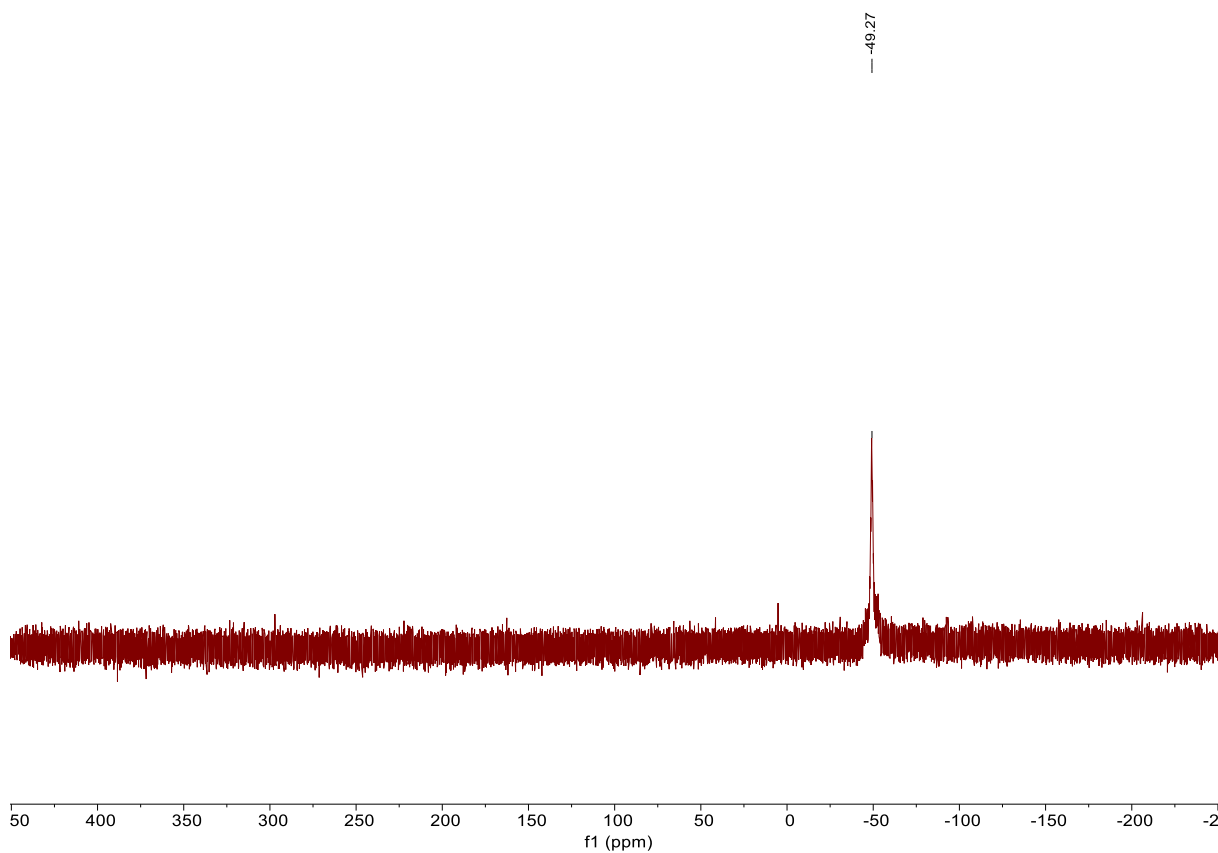

Figure S33 <sup>31</sup>P NMR of 5a in THF-d<sub>8</sub>.

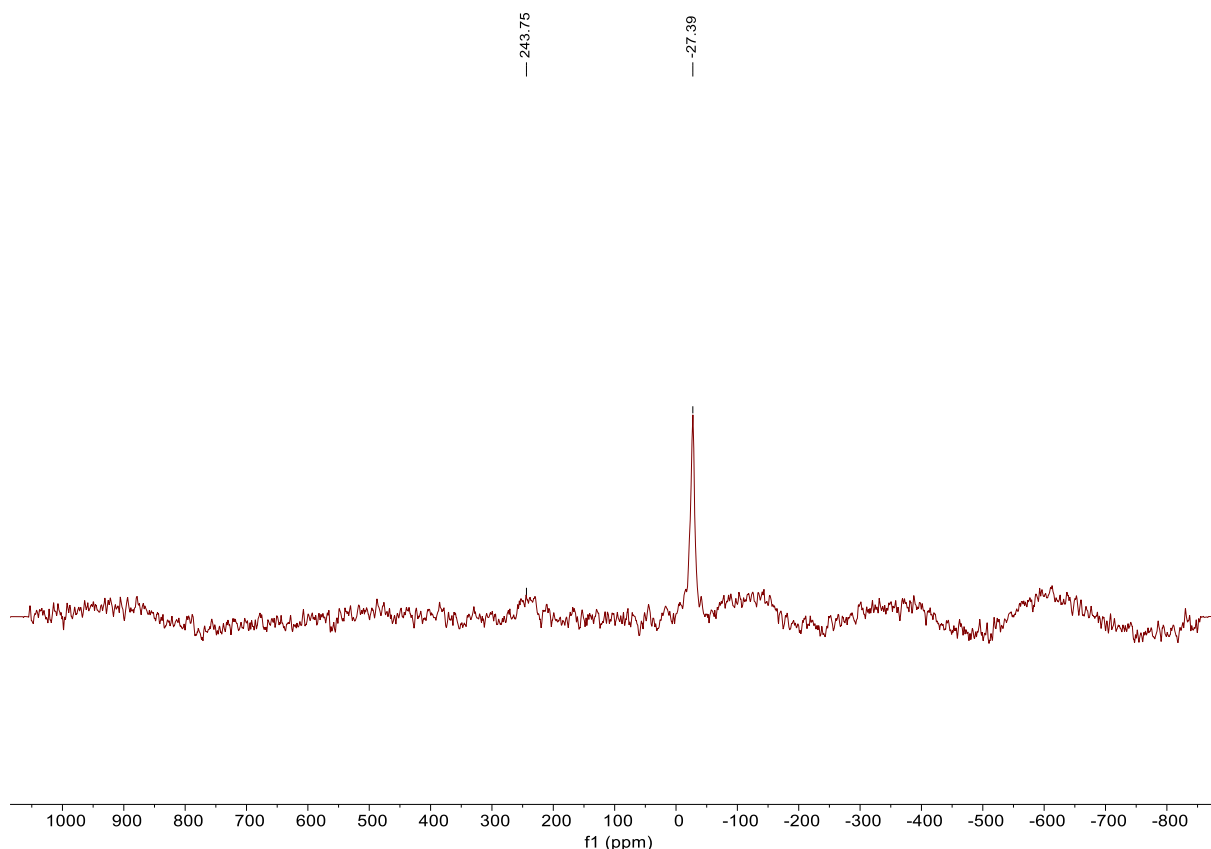

**Figure S34**  $^{119}\text{Sn}$  NMR of **5a** in THF- $d_8$ .

### 1.9 Synthesis of BisNHCP SnBr<sub>2</sub> Complex **5b** (NHC = Me<sub>2</sub>IMes)

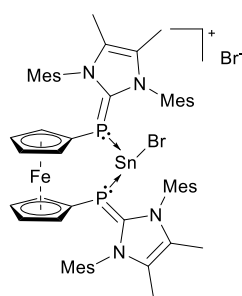

BisNHCP **3b** (30 mg, 32.9  $\mu\text{mol}$ , 1.0 eq) and SnBr<sub>2</sub> (10 mg, 35.9  $\mu\text{mol}$ , 1.1 eq) were dissolved in C<sub>6</sub>D<sub>6</sub> (0.4 mL) until full conversion was observed in the  $^1\text{H}$  and  $^{31}\text{P}$  NMR. The precipitate was separated from the solution and dried under vacuum to yield the product as an orange solid (12.9 mg, 10.9  $\mu\text{mol}$ , 33%).

**$^1\text{H}$  NMR (400 MHz, THF- $d_8$ , 300K):**  $\delta$ [ppm] = 6.93 (s, 8H, C<sub>Mes</sub>H), 3.94 (s, 4H, C<sub>Cp</sub>H), 3.76 (s, 4H, C<sub>Cp</sub>H), 2.35 (s, 12H, *p*-C<sub>Mes</sub>CH<sub>3</sub>), 1.95 (s, 24H, *o*-C<sub>Mes</sub>CH<sub>3</sub>), 1.78 (NCCH<sub>3</sub>).

**$^{13}\text{C}$  (101 MHz, THF- $d_8$ , 300K)**  $\delta$ [ppm] = 141.36 (*p*-C<sub>Mes</sub>CH<sub>3</sub>), 136.69 (NC<sub>Mes</sub>), 131.74 (NCCH<sub>3</sub>), 131.13 (*o*-C<sub>Mes</sub>CH<sub>3</sub>), 130.83 (C<sub>Mes</sub>H), 80.09 (C<sub>Cp</sub>H), 71.18 (C<sub>Cp</sub>H), 21.63 (*p*-C<sub>Mes</sub>CH<sub>3</sub>), 18.95 (*o*-C<sub>Mes</sub>CH<sub>3</sub>), 9.47 (NCCH<sub>3</sub>).

Shifts of carbon atoms directly bound to P were not observed in the  $^{13}\text{C}$  NMR spectrum. The signal at 128.66 ppm is from C<sub>6</sub>D<sub>6</sub> residuals.

$^{31}\text{P}$  (162 Hz, THF- $d_8$ , 300K)  $\delta[\text{ppm}] = -49.57$  (s, satellites  $^1J_{\text{Sn,P}} = 1162$  Hz)

$^{119}\text{Sn}$  (149 Hz, THF- $d_8$ , 300K)  $\delta[\text{ppm}] = 170.47$

LIFDI-MS:      Calculated for  $[\text{C}_{56}\text{H}_{64}\text{BrFeN}_4\text{P}_2\text{Sn}]^+$ :      1109.2161  
                  Observed:                                                              1109.23604

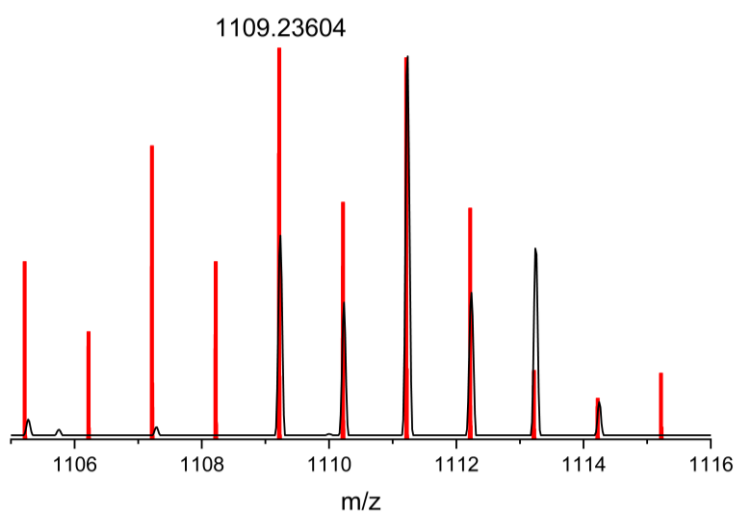

**Figure S35** Measured (black) and calculated (red) LIFDI-MS for  $[\mathbf{5b}\text{-Br}]^+$ .

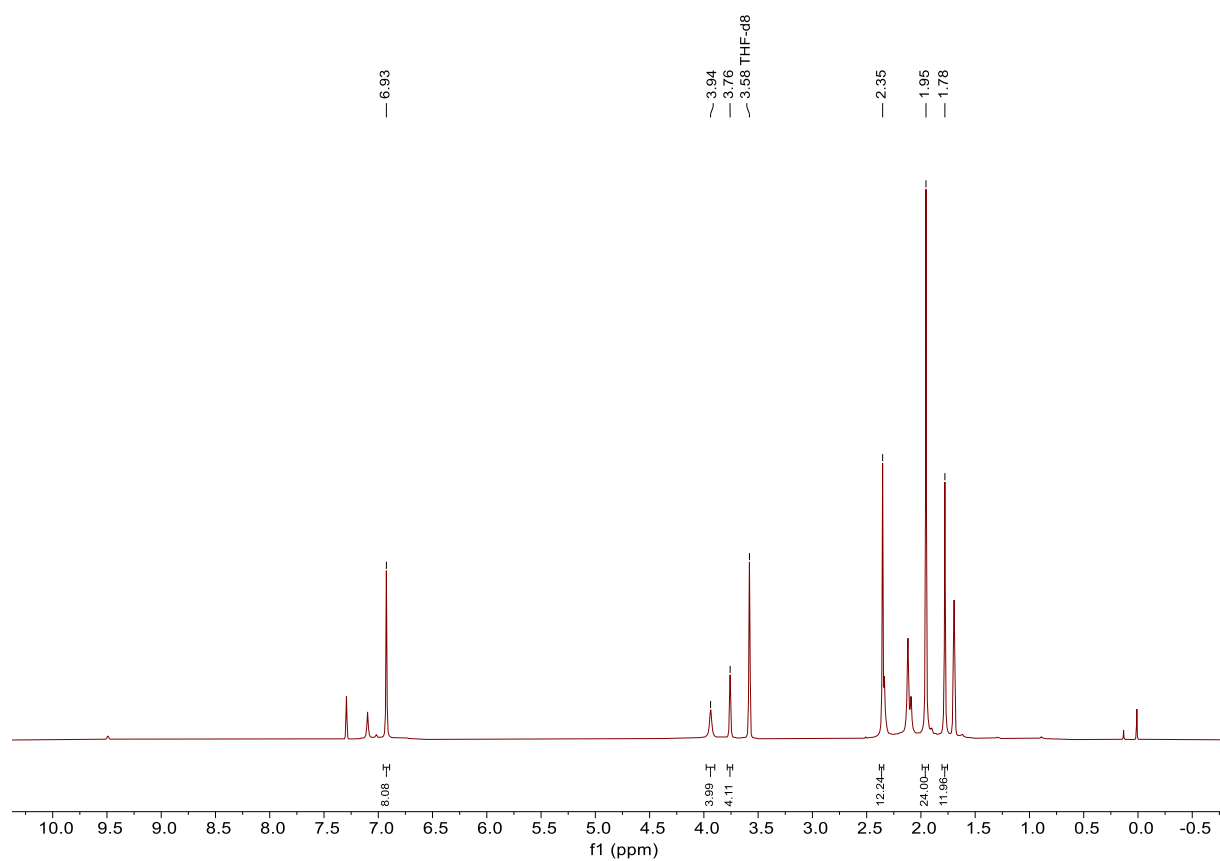

Figure S36 <sup>1</sup>H NMR of **5b** in THF-d<sub>8</sub>.

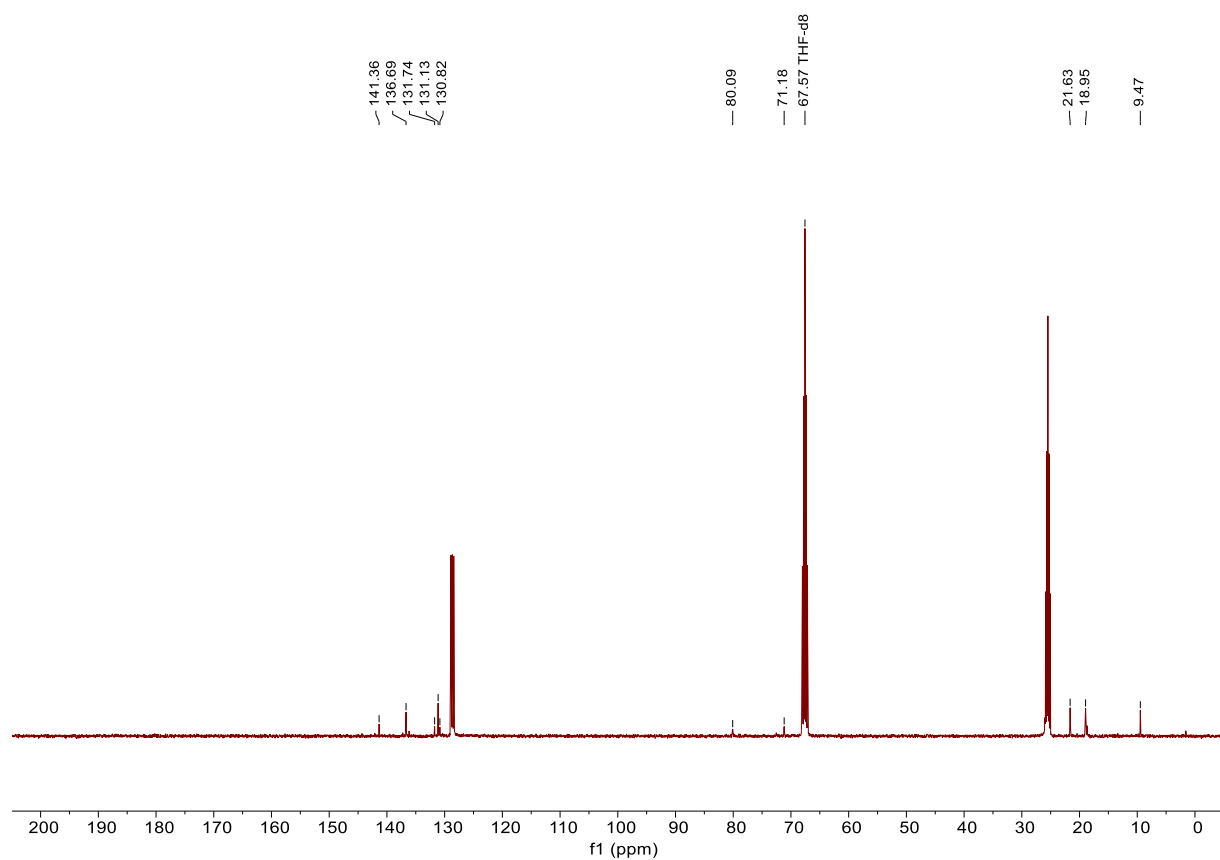

Figure S37 <sup>13</sup>C NMR of **5b** in THF-d<sub>8</sub>.

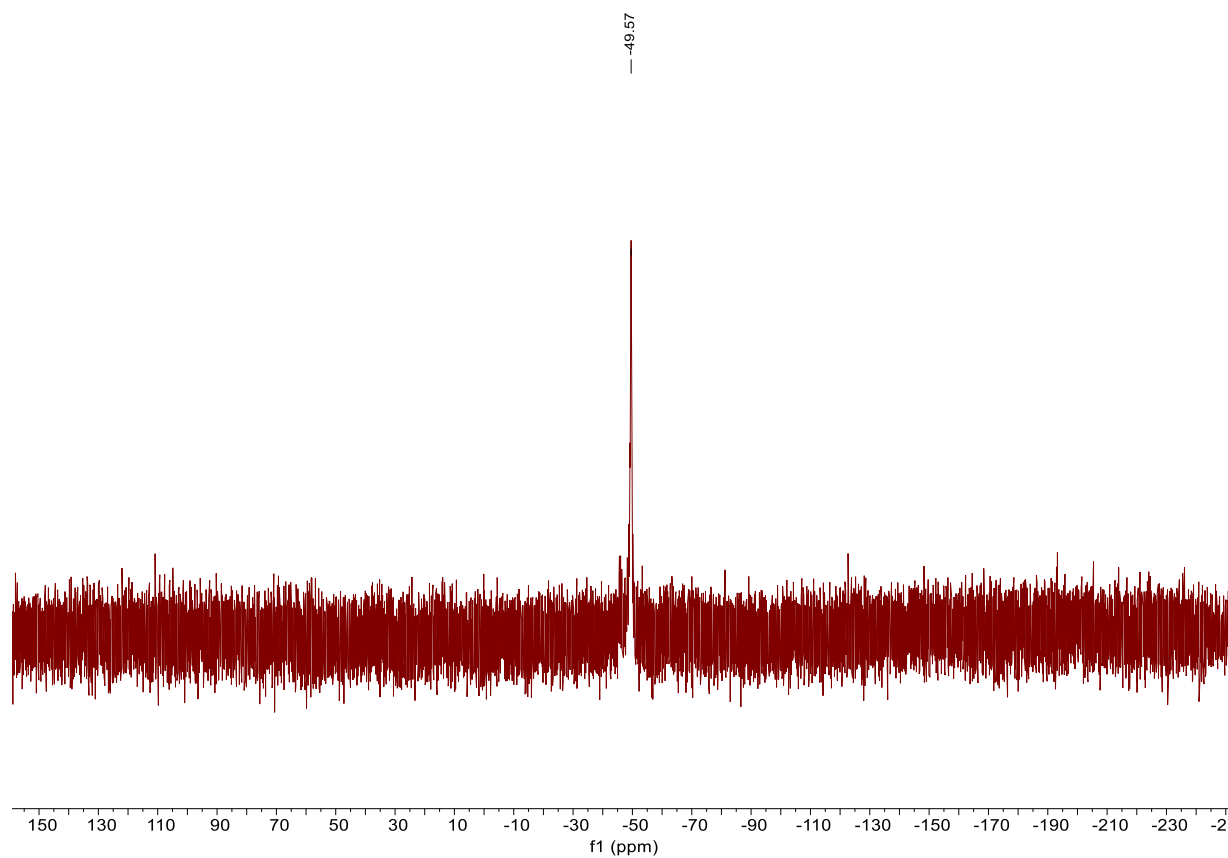

**Figure S38**  $^{31}\text{P}$  NMR of **5b** in  $\text{THF-d}_8$ .

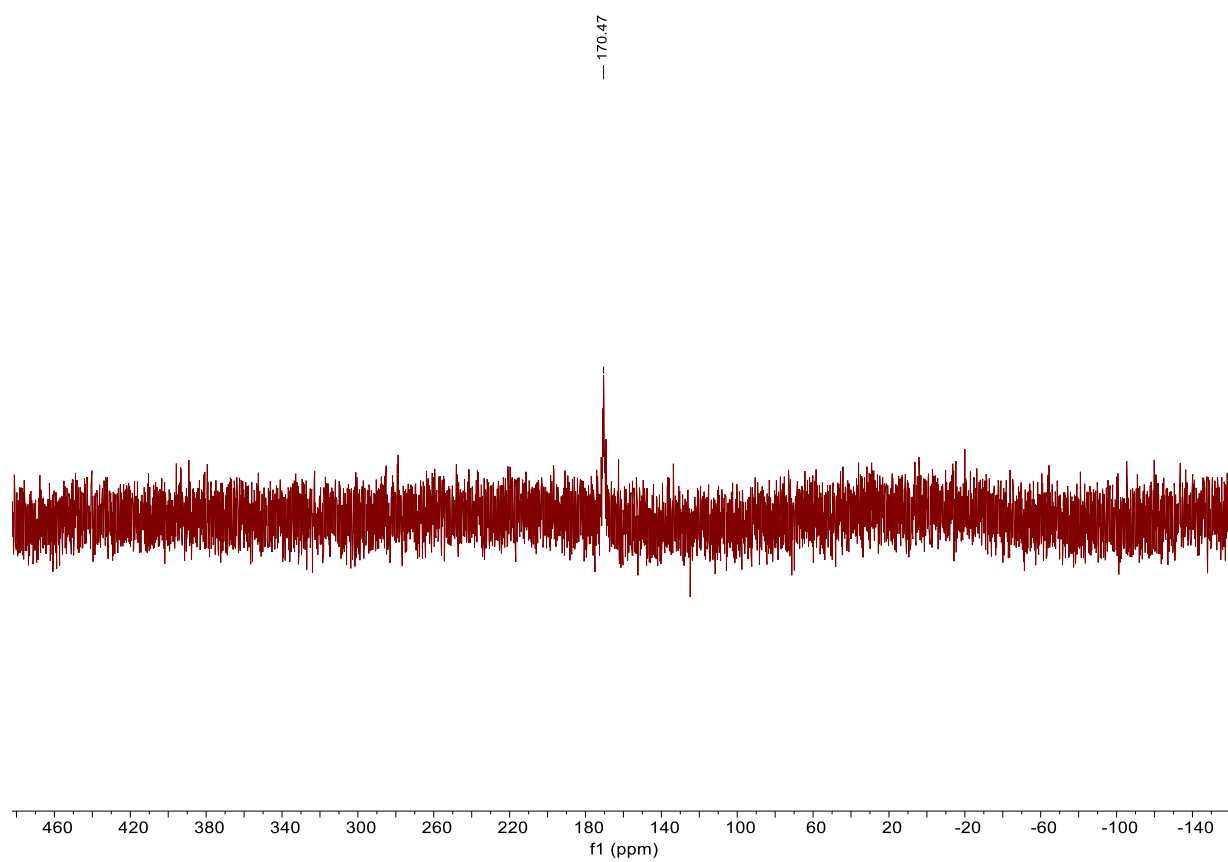

**Figure S39**  $^{119}\text{Sn}$  NMR of **5b** in  $\text{THF-d}_8$ .

## 1.10 Synthesis of BisNHCP SnI<sub>2</sub> Complex **5c** (NHC = Me<sub>2</sub>IMes)

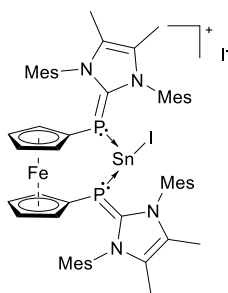

In a J. Young NMR tube, to bisNHCP **3b** (10.0 mg, 10.98  $\mu\text{mol}$ , 1.0 eq) in THF-*d*<sub>8</sub> (0.4 mL) was added SnI<sub>2</sub> (4.1 mg, 10.98  $\mu\text{mol}$ , 1.0 eq). <sup>1</sup>H and <sup>31</sup>P NMR showed full conversion. The reaction solution was filtrated and the solvent removed to obtain a yellow product (11.1 mg, 8.65  $\mu\text{mol}$ , 79%).

**<sup>1</sup>H NMR (400 MHz, THF-*d*<sub>8</sub>, 300K):**  $\delta$ [ppm] = 6.97 (s, 8H, C<sub>Mes</sub>H), 4.05 (s, 4H, C<sub>Cp</sub>H), 3.76 (s, 4H, C<sub>Cp</sub>H), 2.38 (s, 12H, *p*-C<sub>Mes</sub>CH<sub>3</sub>), 2.02 (s, 24H, *o*-C<sub>Mes</sub>CH<sub>3</sub>), 1.85 (NCCH<sub>3</sub>).

**<sup>13</sup>C (101 MHz, THF-*d*<sub>8</sub>, 300K)**  $\delta$ [ppm] = 156.32(d, <sup>1</sup>J<sub>C,P</sub> = 33.1 Hz, C<sub>carbene</sub>P), 155.97 (d, <sup>1</sup>J<sub>C,P</sub> = 32.6 Hz, C<sub>carbene</sub>P), 141.29 (*p*-C<sub>Mes</sub>CH<sub>3</sub>), 136.85 (NC<sub>Mes</sub>), 131.82 (NCCH<sub>3</sub>), 131.14 (*o*-C<sub>Mes</sub>CH<sub>3</sub>), 130.53 (C<sub>Mes</sub>H), 79.89 (m, C<sub>Cp</sub>H), 72.00 (t, <sup>1</sup>J<sub>C,P</sub> = 12.5 Hz, C<sub>carbene</sub>P), 71.06 (C<sub>Cp</sub>H), 21.58 (*p*-C<sub>Mes</sub>CH<sub>3</sub>), 19.34 (*o*-C<sub>Mes</sub>CH<sub>3</sub>), 9.74 (NCCH<sub>3</sub>).

**<sup>31</sup>P (162 Hz, THF-*d*<sub>8</sub>, 300K)**  $\delta$ [ppm] = -52.12 (s, satellites <sup>1</sup>J<sub>119Sn,P</sub> = 1199 Hz, <sup>1</sup>J<sub>117Sn,P</sub> = 1252 Hz)

**<sup>119</sup>Sn (149 Hz, THF-*d*<sub>8</sub>, 300K)**  $\delta$ [ppm] = 262.20 (t, <sup>1</sup>J<sub>Sn,P</sub> = 1254 Hz)

**Elemental Analysis:** C<sub>56</sub>H<sub>64</sub>FeI<sub>2</sub>N<sub>4</sub>P<sub>2</sub>Sn

Calculated [%]: C (52.41), H (5.03), N (4.37)

Observed [%]: C (51.20), H (5.12), N (3.67)

**LIFDI-MS:** Calculated for [C<sub>56</sub>H<sub>64</sub>FeIN<sub>4</sub>P<sub>2</sub>Sn]<sup>+</sup>: 1157.20224

Observed: 1157.20661

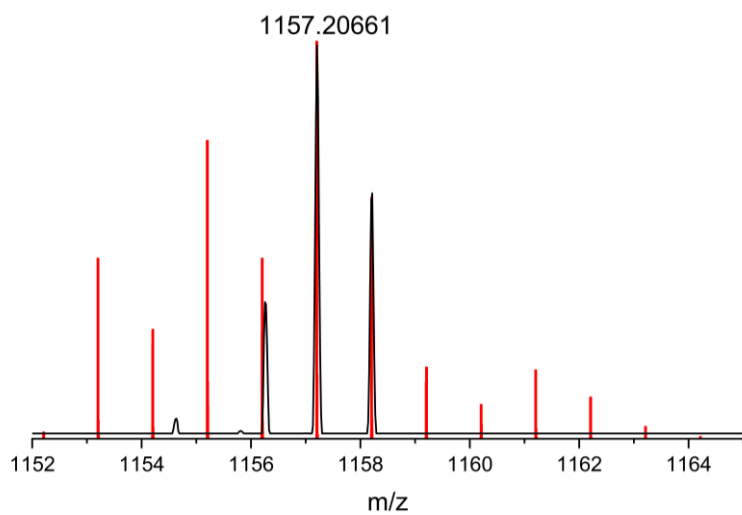

**Figure S40** Measured (black) and calculated (red) LIFDI-MS for  $[5c-I]^+$ .

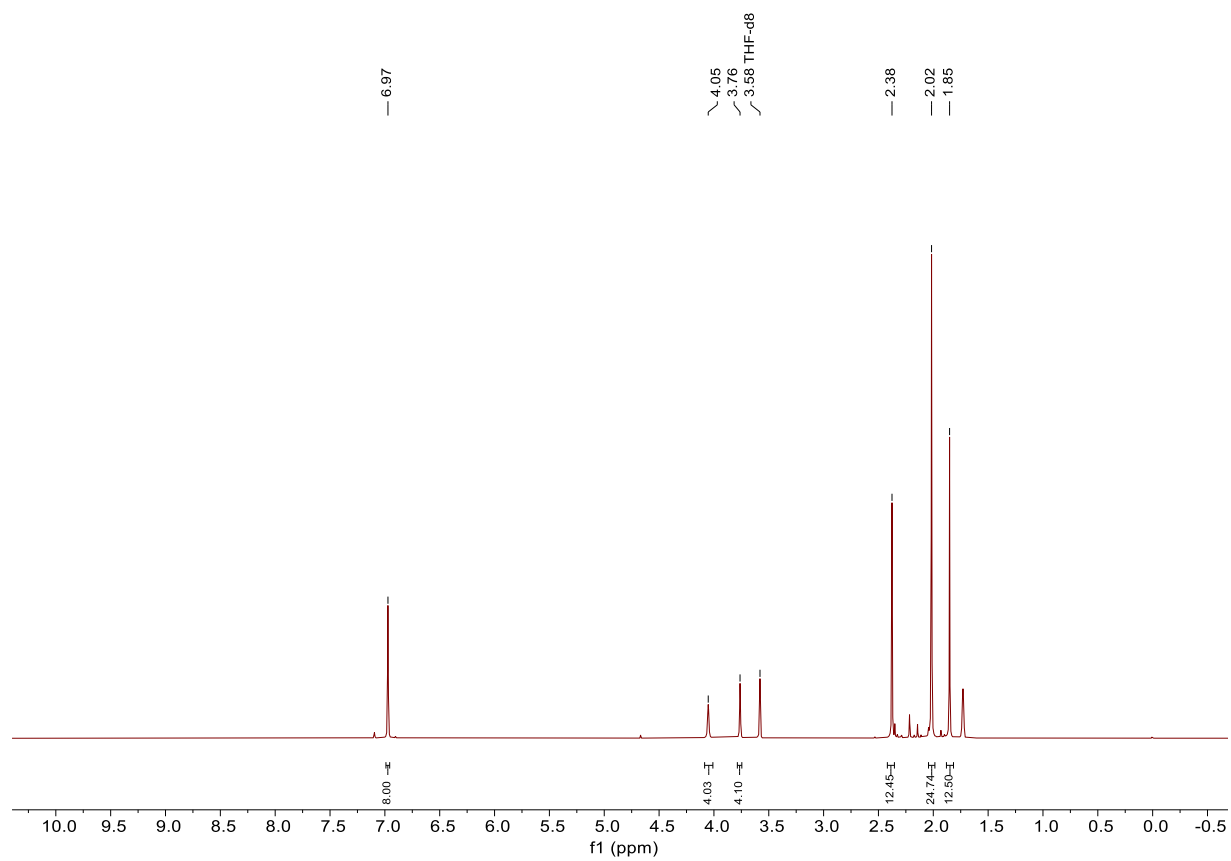

**Figure S41**  $^1H$  NMR of **5c** in  $THF-d_8$ .

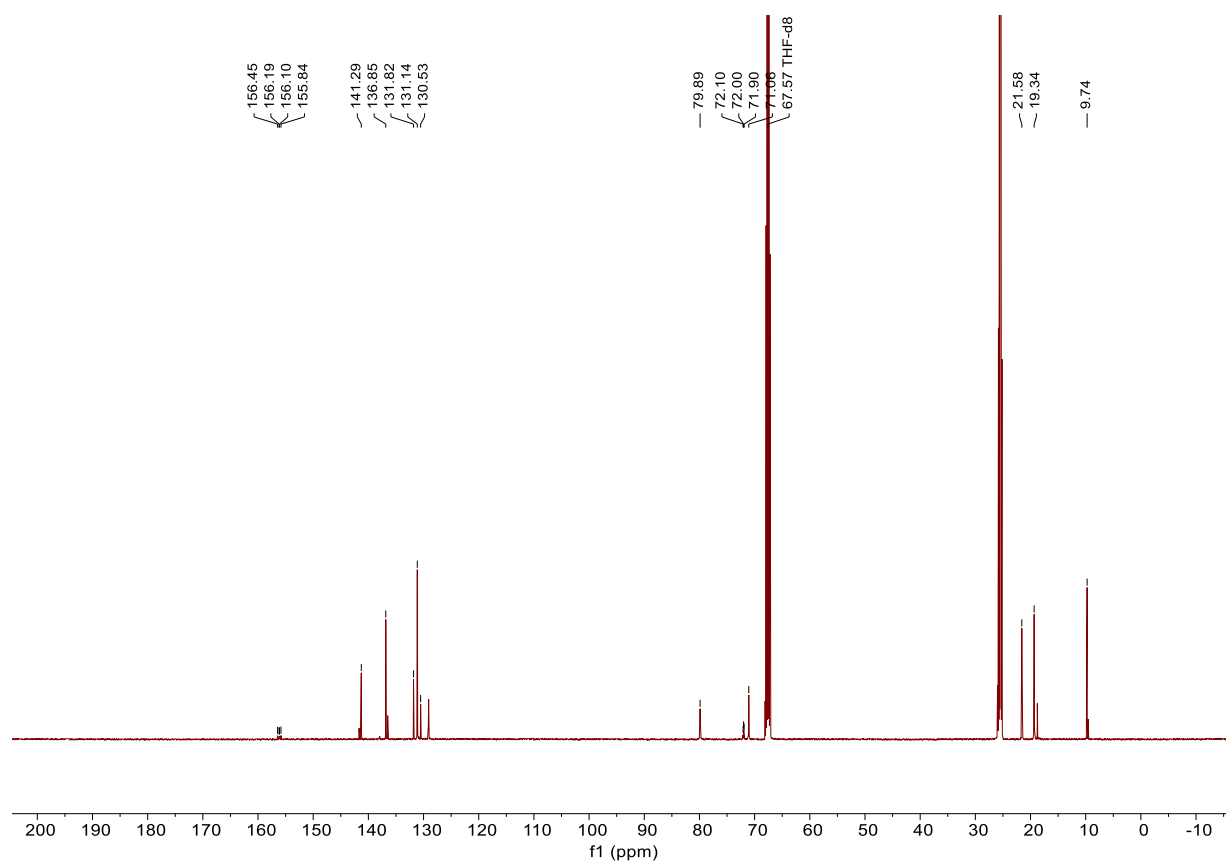

Figure S42  $^{13}\text{C}$  NMR of 5c in THF- $d_8$ .

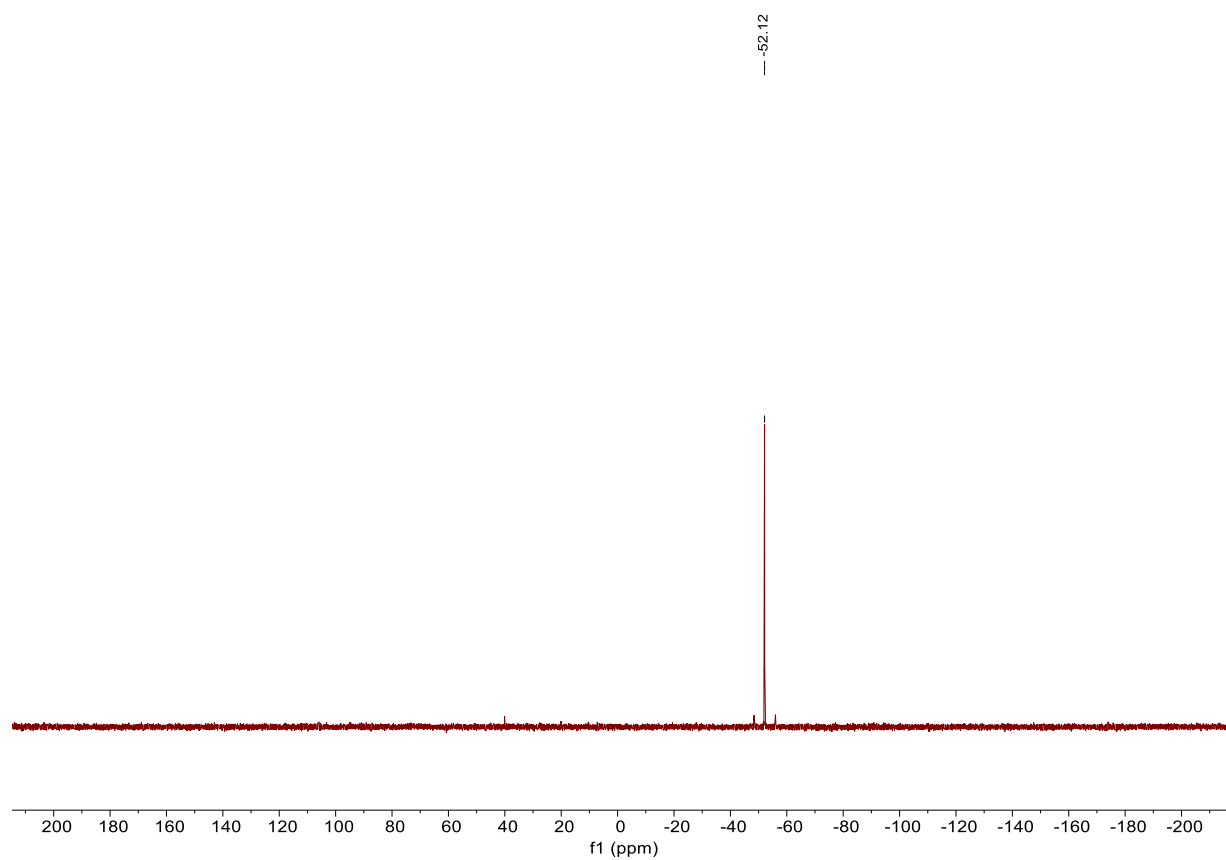

Figure S43  $^{31}\text{P}$  NMR of 5c in THF- $d_8$ .



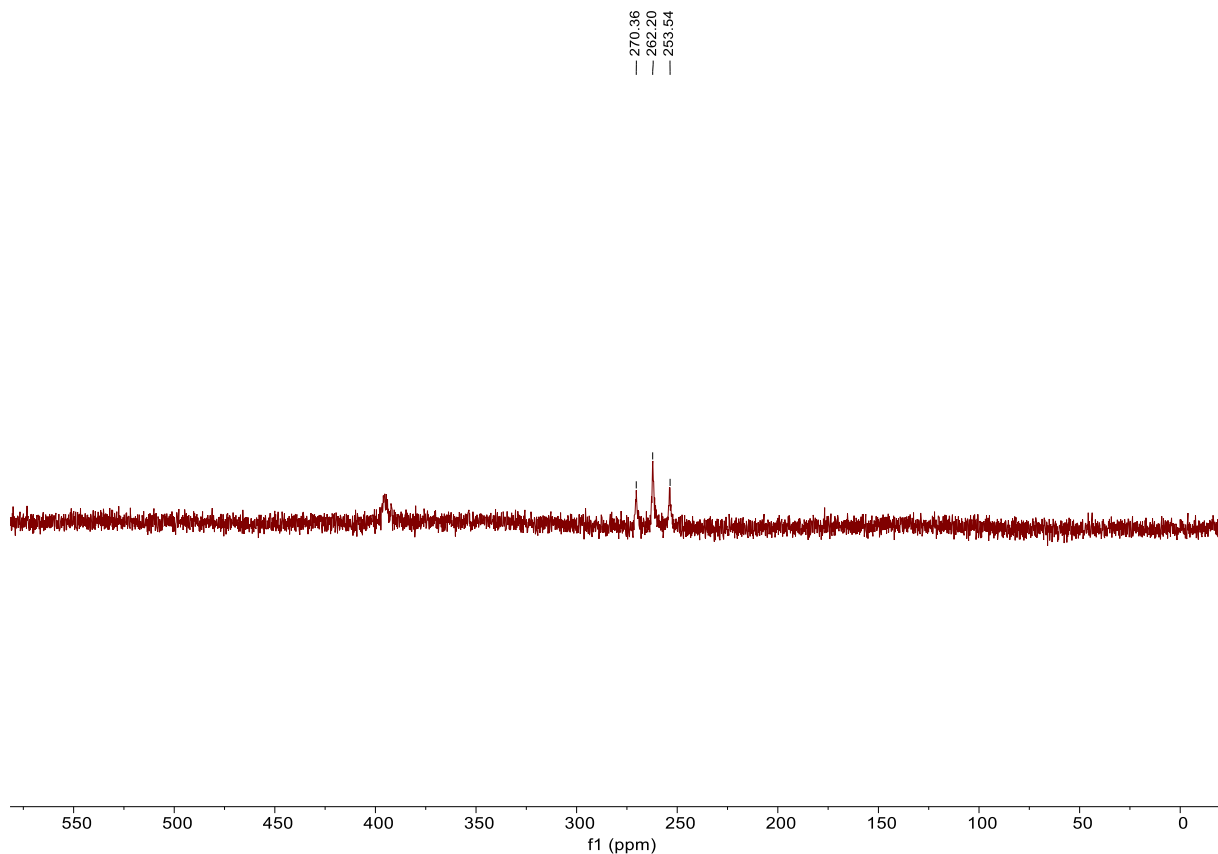

**Figure S44**  $^{119}\text{Sn}$  NMR of **5c** in THF- $d_8$ .

### 1.11 Synthesis of BisNHCP Sn(OTf) $_2$ Complex **5d** (NHC = $\text{Me}^e\text{IMes}$ )

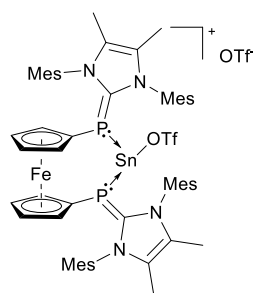

BisNHCP **3b** (15.0 mg, 16.5  $\mu\text{mol}$ , 1.0 eq) and  $\text{Sn}(\text{OTf})_2 \cdot \text{dioxane}$  (8.3 mg, 16.5  $\mu\text{mol}$ , 1.0 eq) were dissolved in benzene (0.4 mL) and stirred for 3h. The solvent was removed and the residue extracted with THF. After removal of the solvent a yellow product (21.0 mg, 15.8  $\mu\text{mol}$ , 96%) was isolated.

**$^1\text{H}$  NMR (400 MHz, THF- $d_8$ , 300K):**  $\delta$ [ppm] = 6.99 (s, 8H,  $C_{\text{Mes}}\text{H}$ ), 3.83 (s, 4H,  $C_{\text{Cp}}\text{H}$ ), 3.81 (s, 4H,  $C_{\text{Cp}}\text{H}$ ), 2.39 (s, 12H,  $p\text{-}C_{\text{Mes}}\text{CH}_3$ ), 1.95 (s, 24H,  $o\text{-}C_{\text{Mes}}\text{CH}_3$ ), 1.84 (NCCH $_3$ ).

**$^{13}\text{C}$  (101 MHz, THF- $d_8$ , 300K)**  $\delta$ [ppm] = 153.24 (d,  $^1J_{\text{C,P}} = 31.2$  Hz,  $C_{\text{carbeneP}}$ ), 152.87 (d,  $^1J_{\text{C,P}} = 31.0$  Hz,  $C_{\text{carbeneP}}$ ), 141.36 ( $p\text{-}C_{\text{Mes}}\text{CH}_3$ ), 136.80 (NC $_{\text{Mes}}$ ), 131.49 (NCCH $_3$ ), 131.37 ( $o\text{-}C_{\text{Mes}}\text{CH}_3$ ), 129.62 ( $C_{\text{Mes}}\text{H}$ ), 80.68 (m,  $C_{\text{Cp}}\text{H}$ ), 71.94 ( $C_{\text{Cp}}\text{H}$ ), 69.88 (t,  $^1J_{\text{C,P}} = 10.5$  Hz,  $C_{\text{CpP}}$ ), 21.54 ( $p\text{-}C_{\text{Mes}}\text{CH}_3$ ), 18.40 ( $o\text{-}C_{\text{Mes}}\text{CH}_3$ ), 9.08 (NCCH $_3$ ).

$^{19}\text{F}$  (377 MHz, THF- $d_8$ , 300K)  $\delta$ [ppm] = -78.56 ppm

$^{31}\text{P}$  (162 Hz, THF- $d_8$ , 300K)  $\delta$ [ppm] = -30.56 (s,  $^1J_{^{119}\text{Sn},\text{P}} = 1189$  Hz,  $^1J_{^{117}\text{Sn},\text{P}} = 1247$  Hz)

$^{119}\text{Sn}$  (149 Hz, THF- $d_8$ , 300K)  $\delta$ [ppm] = 465.20 (t,  $^1J_{\text{Sn},\text{P}} = 1270$  Hz)

**Elemental Analysis:**  $\text{C}_{58}\text{H}_{64}\text{F}_6\text{FeN}_4\text{O}_6\text{P}_2\text{S}_2\text{Sn}$

Calculated [%]: C (52.47), H (4.86), N (4.22), S (4.83)

Observed [%]: C (52.18), H (5.11), N (4.15), S (4.68)

**LIFDI-MS:** Calculated for  $[\text{C}_{57}\text{H}_{64}\text{F}_3\text{FeN}_4\text{O}_3\text{P}_2\text{SSn}]^+$ : 1179.24979

Observed: 1179.24543

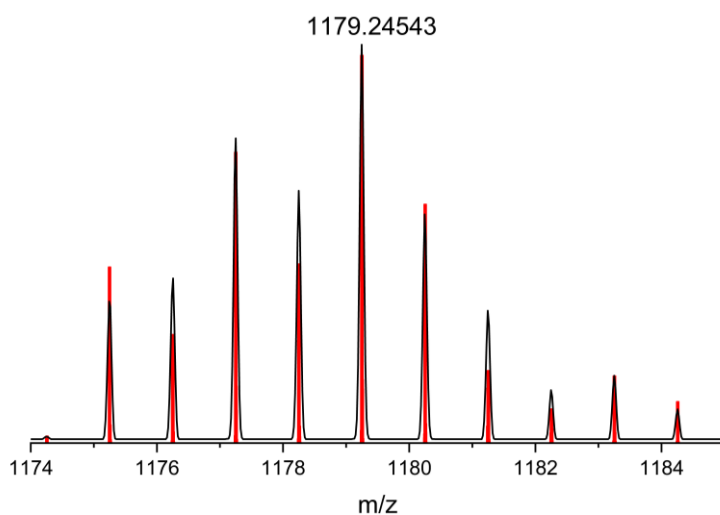

**Figure S45** Measured (left) and calculated (right) LIFDI-MS for  $[\mathbf{5d}\text{-OTf}]^+$ .

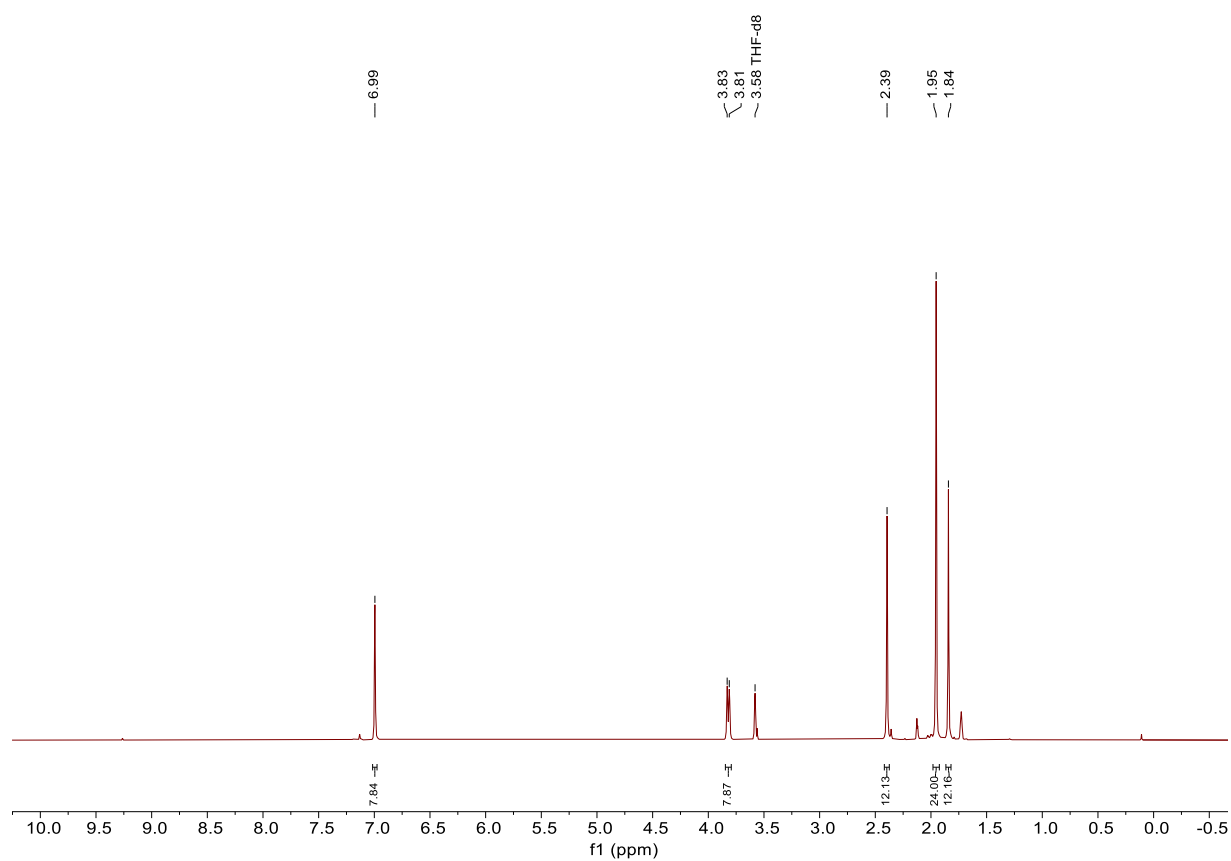

Figure S46  $^1\text{H}$  NMR of **5d** in THF- $d_8$ .

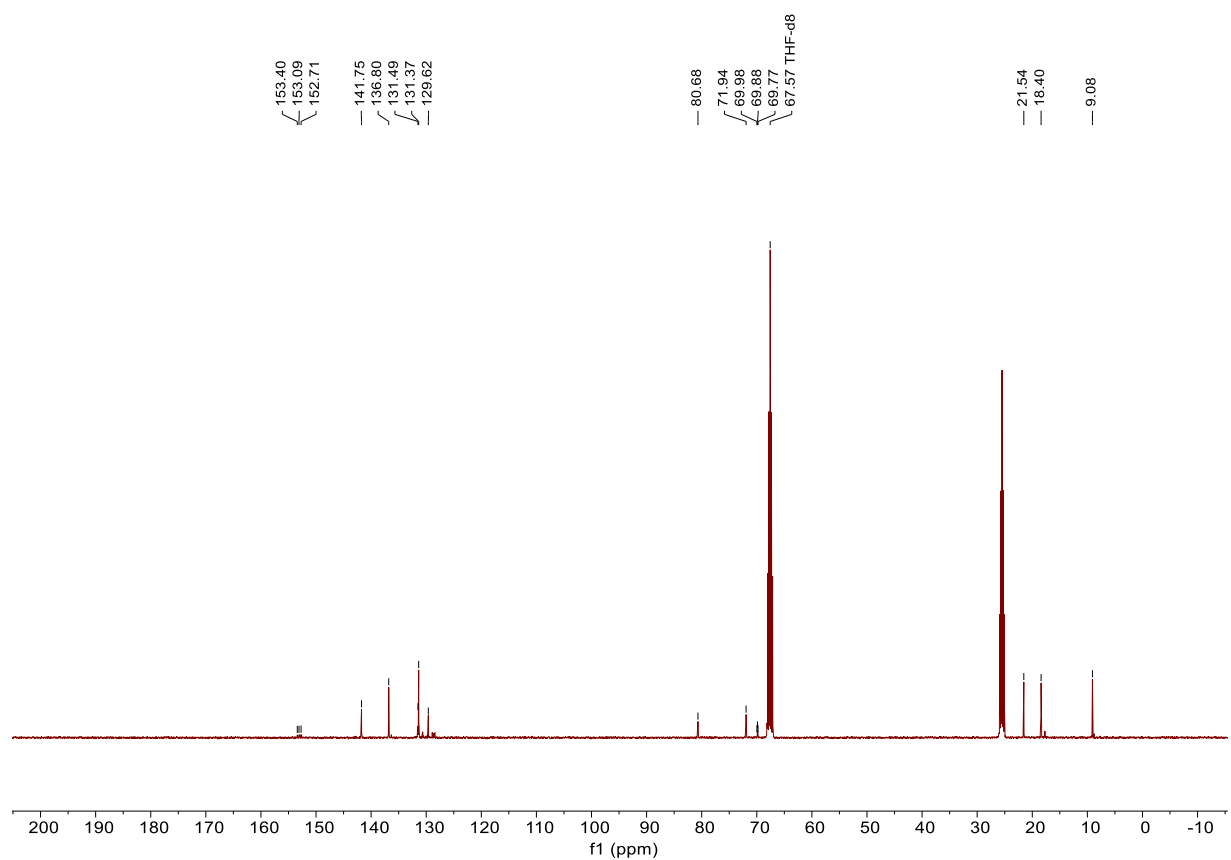

Figure S47  $^{13}\text{C}$  NMR of **5d** in THF- $d_8$ .

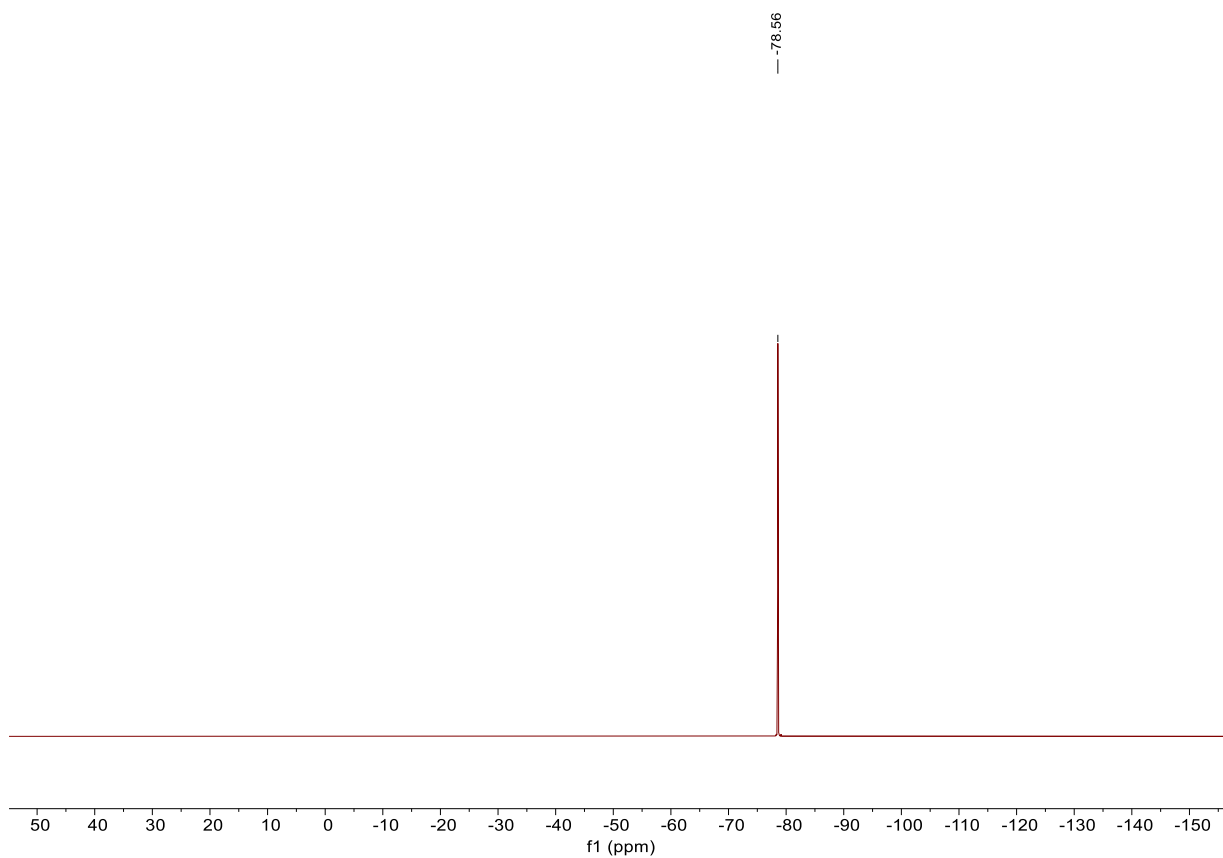

Figure S48  $^{19}\text{F}$  NMR of 5d in THF- $d_8$ .

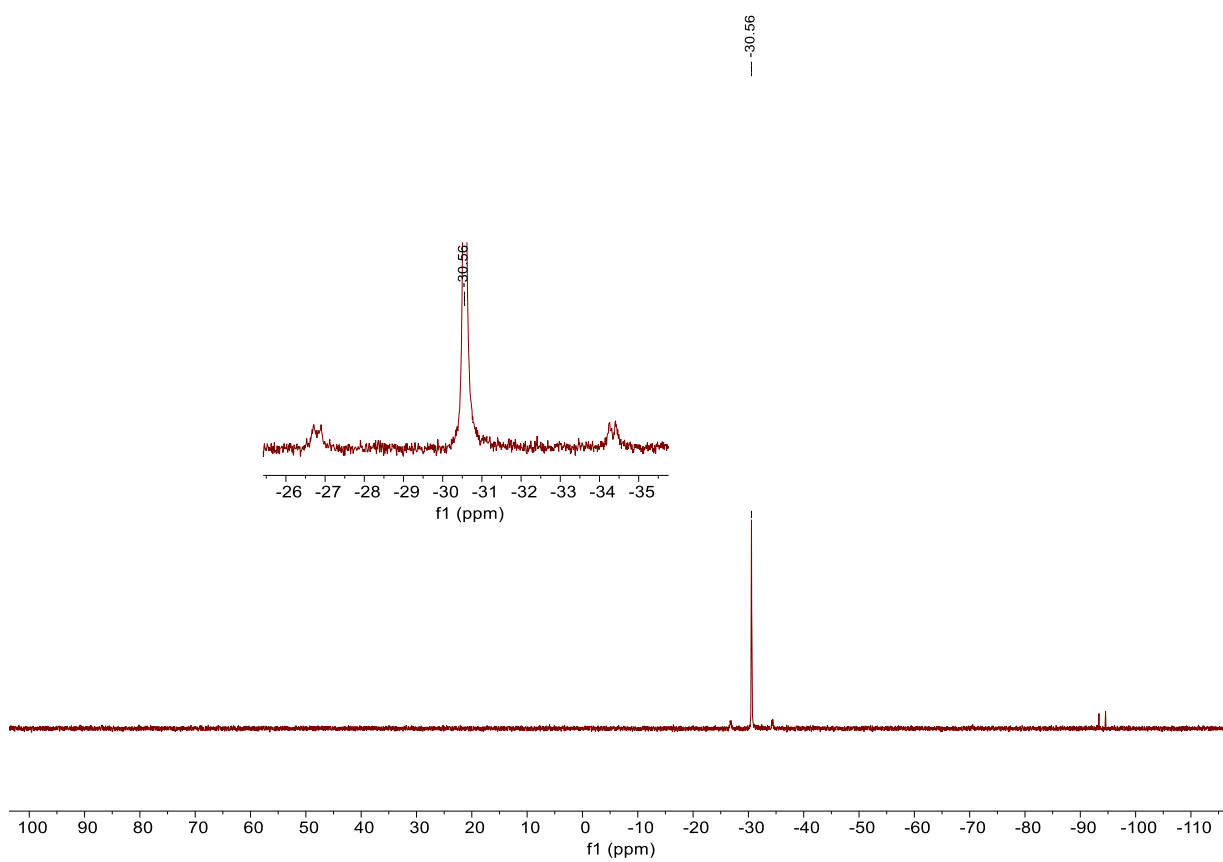

Figure S49  $^{31}\text{P}$  NMR of 5d in THF- $d_8$ .

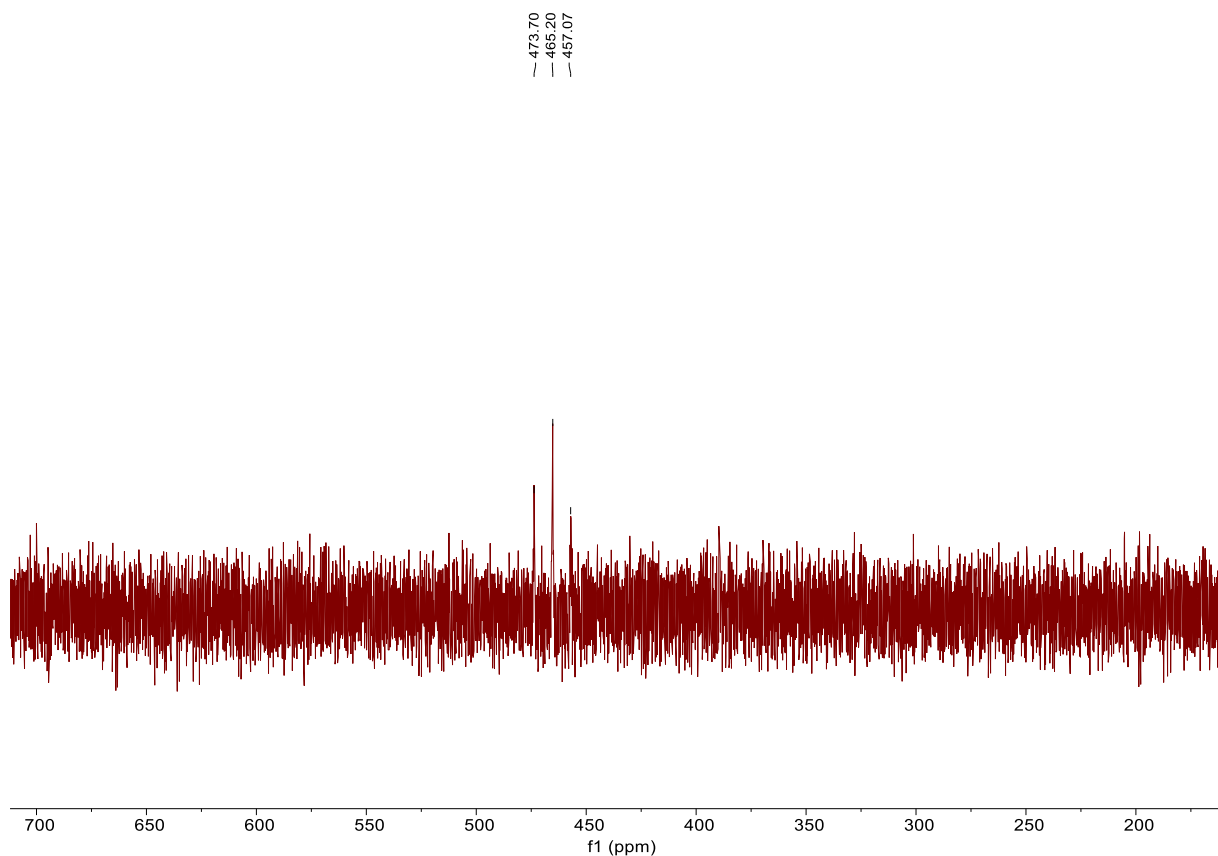

**Figure S50**  $^{119}\text{Sn}$  NMR of **5d** in THF- $d_8$ .

## 1.12 Synthesis of BisNHCP CuCl Complex **7a** (NHC = IMes)

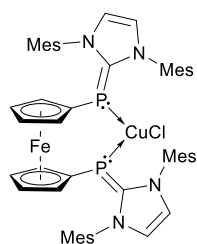

BisNHCP **3a** (30.0 mg, 35.09  $\mu\text{mol}$ , 1.0 eq) and CuCl (3.5 mg, 35.35  $\mu\text{mol}$ , 1.0 eq) were dissolved in THF- $d_8$  (0.4 mL). Filtration and removal of the solvent in vacuo yielded the product as yellow solid (17.7 mg, 18.56  $\mu\text{mol}$ , 53%).

**$^1\text{H}$  NMR (400 MHz, THF- $d_8$ , 300K):**  $\delta$ [ppm] = 6.92 (s, 4H, NCH), 6.78 (s, 8H,  $\text{C}_{\text{Mes}}\text{H}$ ), 3.50 (t,  $J = 1.8$  Hz, 4H,  $\text{C}_{\text{Cp}}\text{H}$ ), 3.13 (s, 4H,  $\text{C}_{\text{Cp}}\text{H}$ ), 2.30 (s, 12H,  $p\text{-C}_{\text{Mes}}\text{CH}_3$ ), 2.11 (s, 24H,  $o\text{-C}_{\text{Mes}}\text{CH}_3$ ).

**$^{13}\text{C}$  (101 MHz, THF- $d_8$ , 300K)**  $\delta$ [ppm] = 167.55 (dd,  $^1J_{\text{C,P}} = 58.7, 37.9$  Hz,  $\text{C}_{\text{CarbeneP}}$ ) 139.02 ( $p\text{-C}_{\text{Mes}}\text{CH}_3$ ), 137.22 ( $\text{NC}_{\text{Mes}}$ ), 135.45 ( $p\text{-C}_{\text{Mes}}\text{CH}_3$ ), 129.85 ( $\text{C}_{\text{Mes}}\text{H}$ ), 122.19 (NCH), 81.60 (m,  $\text{C}_{\text{Cp}}\text{H}$ ), 73.50 (t,  $^1J_{\text{C,P}} = 8.0$  Hz,  $\text{C}_{\text{Cp}}\text{P}$ ), 70.06 ( $\text{C}_{\text{Cp}}\text{H}$ ), 21.40 ( $p\text{-C}_{\text{Mes}}\text{CH}_3$ ), 19.45 ( $o\text{-C}_{\text{Mes}}\text{CH}_3$ ).

**$^{31}\text{P}$  (162 Hz, THF- $d_8$ , 300K)**  $\delta$ [ppm] = -80.45

**LIFDI-MS:** Calculated for  $C_{52}H_{56}ClCuFeN_4P_2$ : 952.23141  
Observed: 952.23171

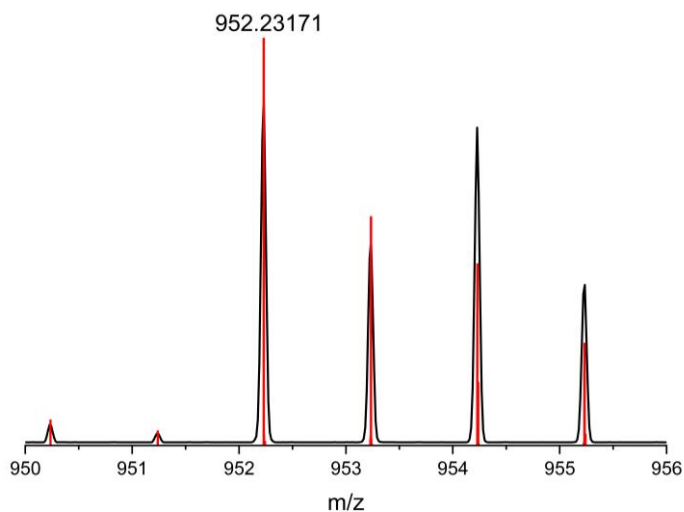

**Figure S51** Measured (black) and calculated (red) LIFDI-MS for **7a**.

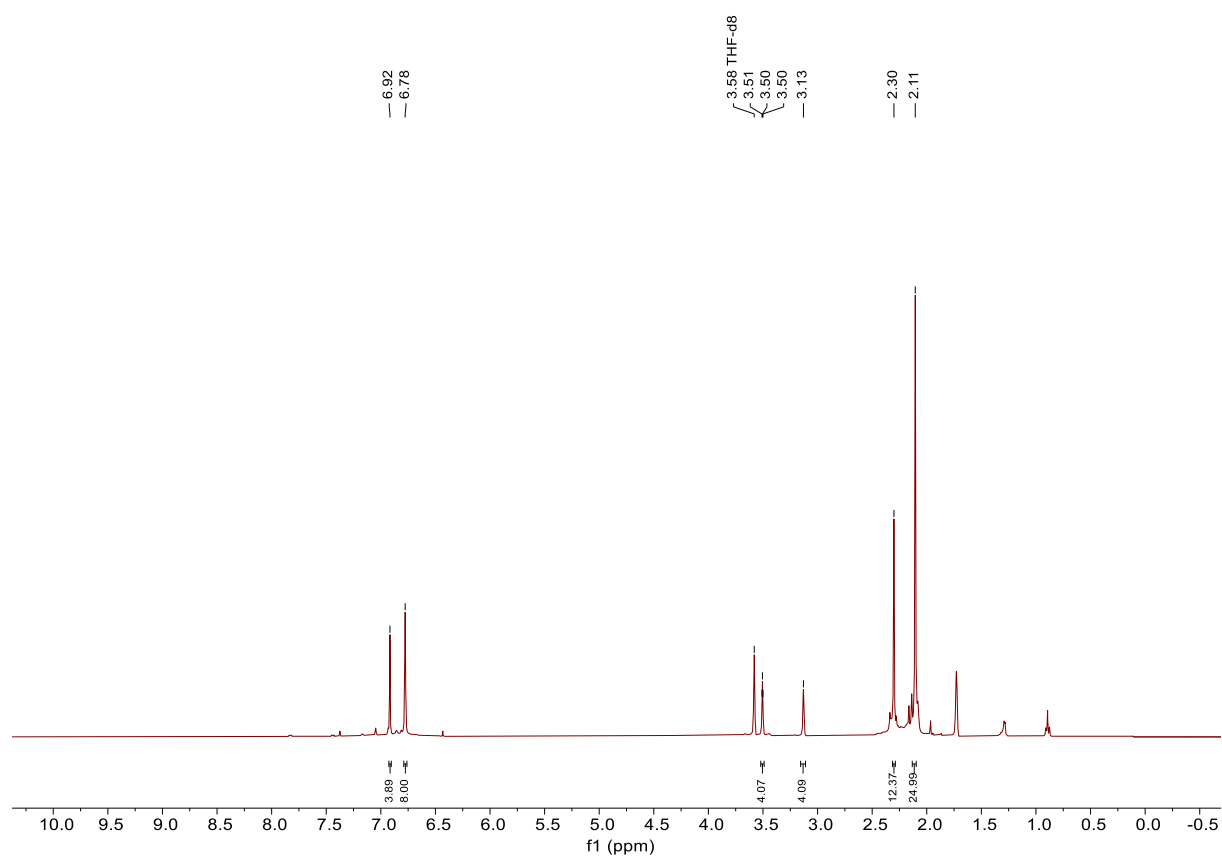

**Figure S52**  $^1H$  NMR of **7a** in THF- $d_8$ .

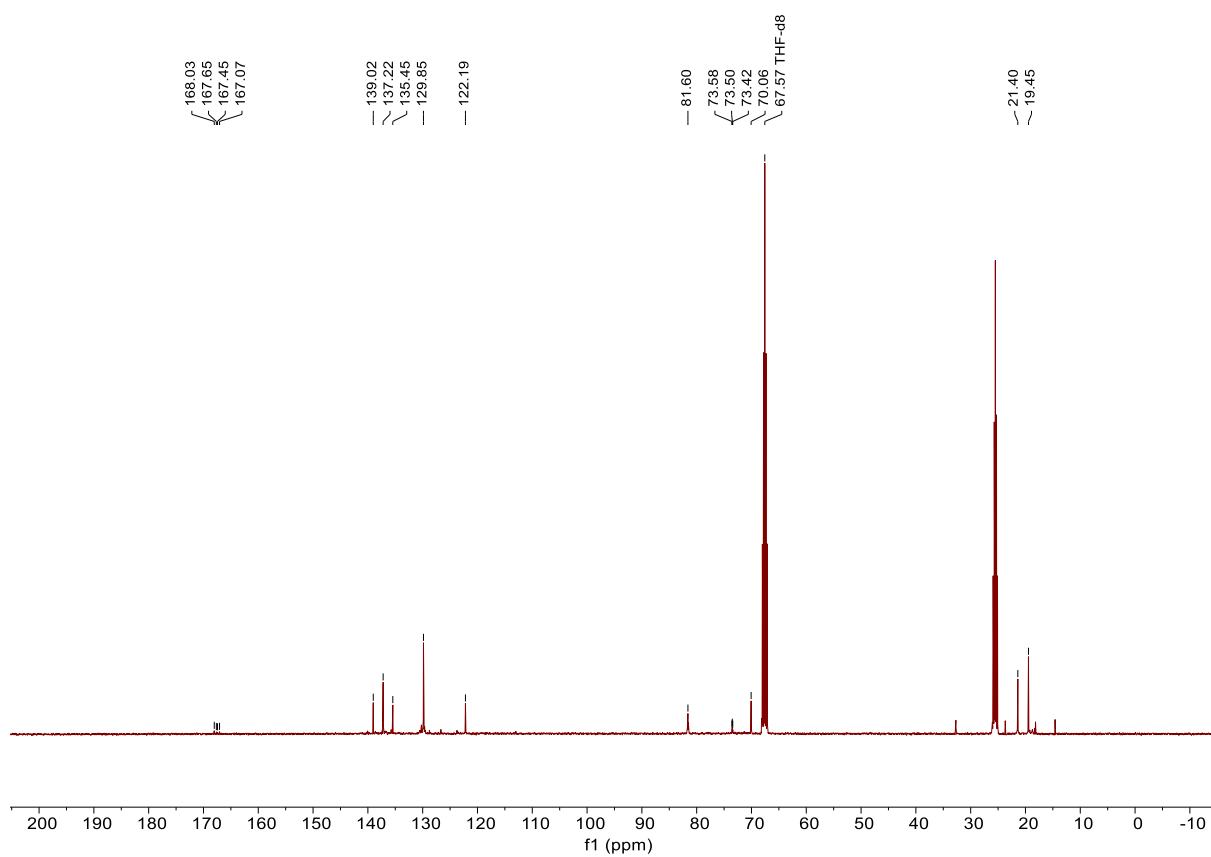

Figure S53 <sup>13</sup>C NMR of 7a in THF-d<sub>8</sub>.

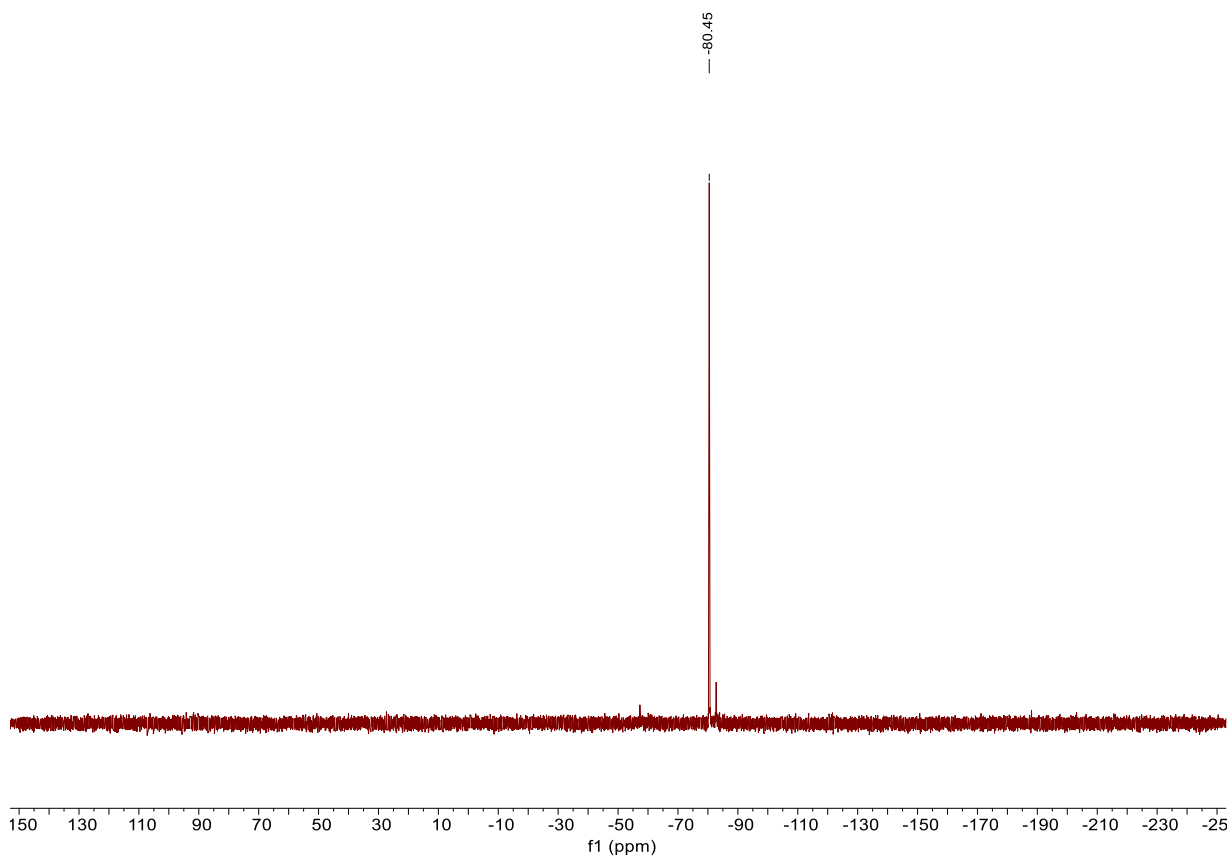

Figure S54 <sup>31</sup>P NMR of 7a in THF-d<sub>8</sub>.

### 1.13 Synthesis of BisNHCP CuCl Complex **7b** (NHC = <sup>Me</sup>IMes)

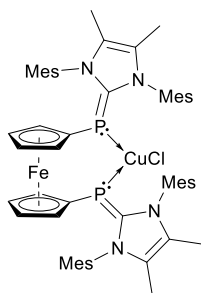

Toluene (3 mL) was added to bisNHCP **3b** (30 mg, 32.93  $\mu\text{mol}$ , 1.0 eq) and CuCl (3.3 mg, 32.93  $\mu\text{mol}$ , 1.0 eq). The suspension was stirred overnight. The solvent was removed and the residue extracted with THF. After removal of the solvent in vacuo, a yellow product (29.3 mg, 29.01  $\mu\text{mol}$ , 88%) was obtained.

**<sup>1</sup>H NMR (400 MHz, THF-d<sub>8</sub>, 300K):**  $\delta$ [ppm] = 6.79 (s, 8H, C<sub>Mes</sub>H), 3.49 (t,  $J$  = 1.8 Hz, 4H, C<sub>Cp</sub>H), 3.06 (s, 4H, C<sub>Cp</sub>H), 2.31 (s, 12H, *p*-C<sub>Mes</sub>CH<sub>3</sub>), 2.07 (s, 24H, *o*-C<sub>Mes</sub>CH<sub>3</sub>), 1.72 (NCCH<sub>3</sub>).

**<sup>13</sup>C (101 MHz, THF-d<sub>8</sub>, 300K)**  $\delta$ [ppm] = 138.97 (*p*-C<sub>Mes</sub>CH<sub>3</sub>), 137.71 (NC<sub>Mes</sub>), 133.71 (NCCH<sub>3</sub>), 129.95 (*o*-C<sub>Mes</sub>CH<sub>3</sub>), 124.76 (C<sub>Mes</sub>H), 81.90 (m, C<sub>Cp</sub>H), 69.90 (C<sub>Cp</sub>H), 21.46 (*p*-C<sub>Mes</sub>CH<sub>3</sub>), 19.39 (*o*-C<sub>Mes</sub>CH<sub>3</sub>), 9.12 (NCCH<sub>3</sub>).

Shifts of carbon atoms directly bound to P were not observed in the <sup>13</sup>C NMR spectrum.

**<sup>31</sup>P (162 Hz, THF-d<sub>8</sub>, 300K)**  $\delta$ [ppm] = -82.34

**Elemental Analysis:** C<sub>56</sub>H<sub>64</sub>ClCuFeN<sub>4</sub>P<sub>2</sub>

Calculated [%]: C (66.60), H (6.39), N (5.55)

Observed [%]: C (63.94), H (6.33), N (4.65)

**LIFDI-MS:** Calculated for C<sub>56</sub>H<sub>64</sub>ClCuFeN<sub>4</sub>P<sub>2</sub>: 1008.29401

Observed: 1008.29467



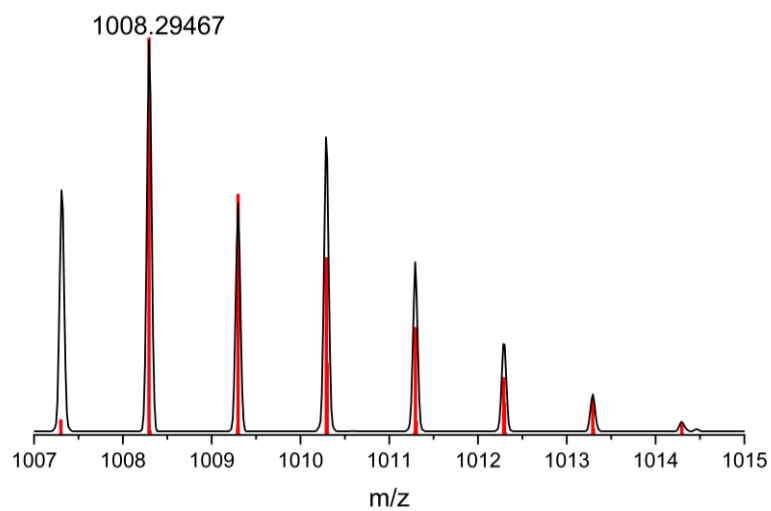

**Figure S55** Measured (black) and calculated (red) LIFDI-MS for **7b**.

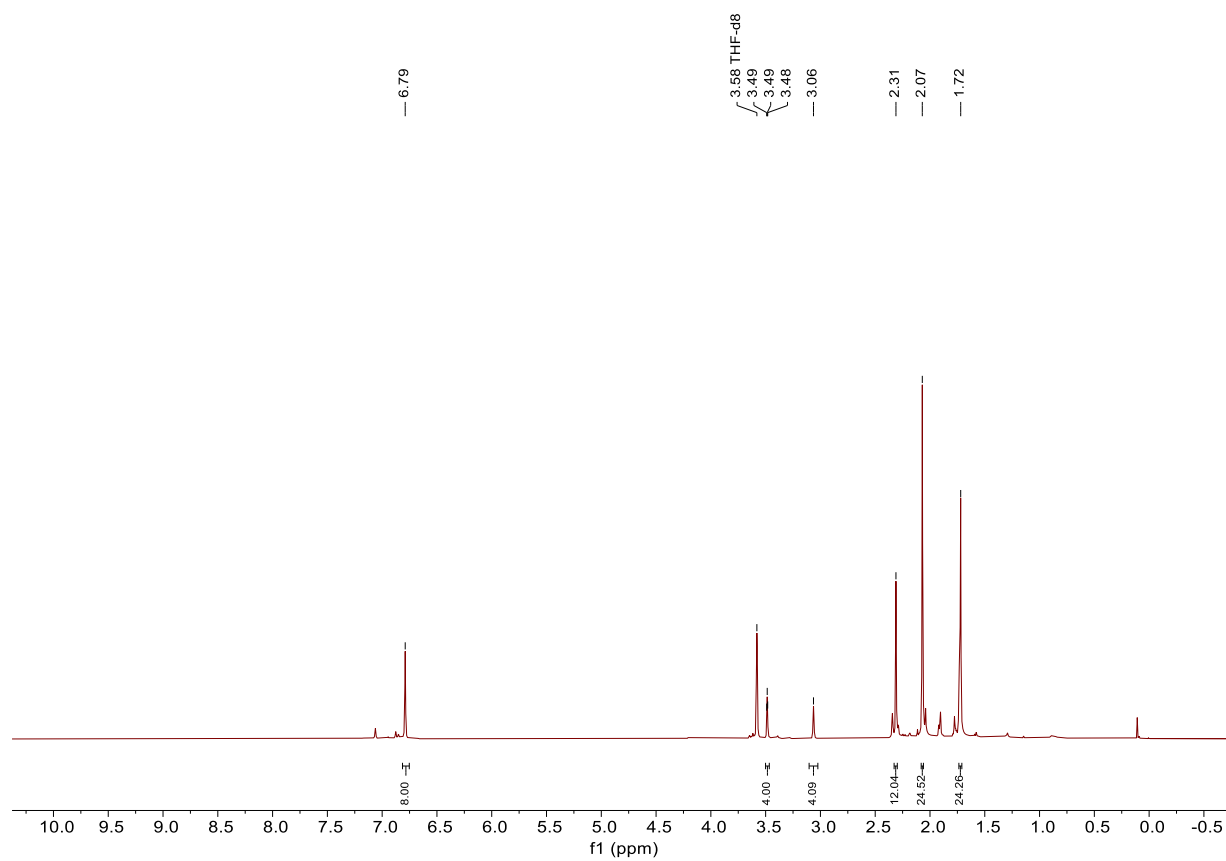

**Figure S56**  $^1\text{H}$  NMR of **7b** in  $\text{THF-d}_8$ .

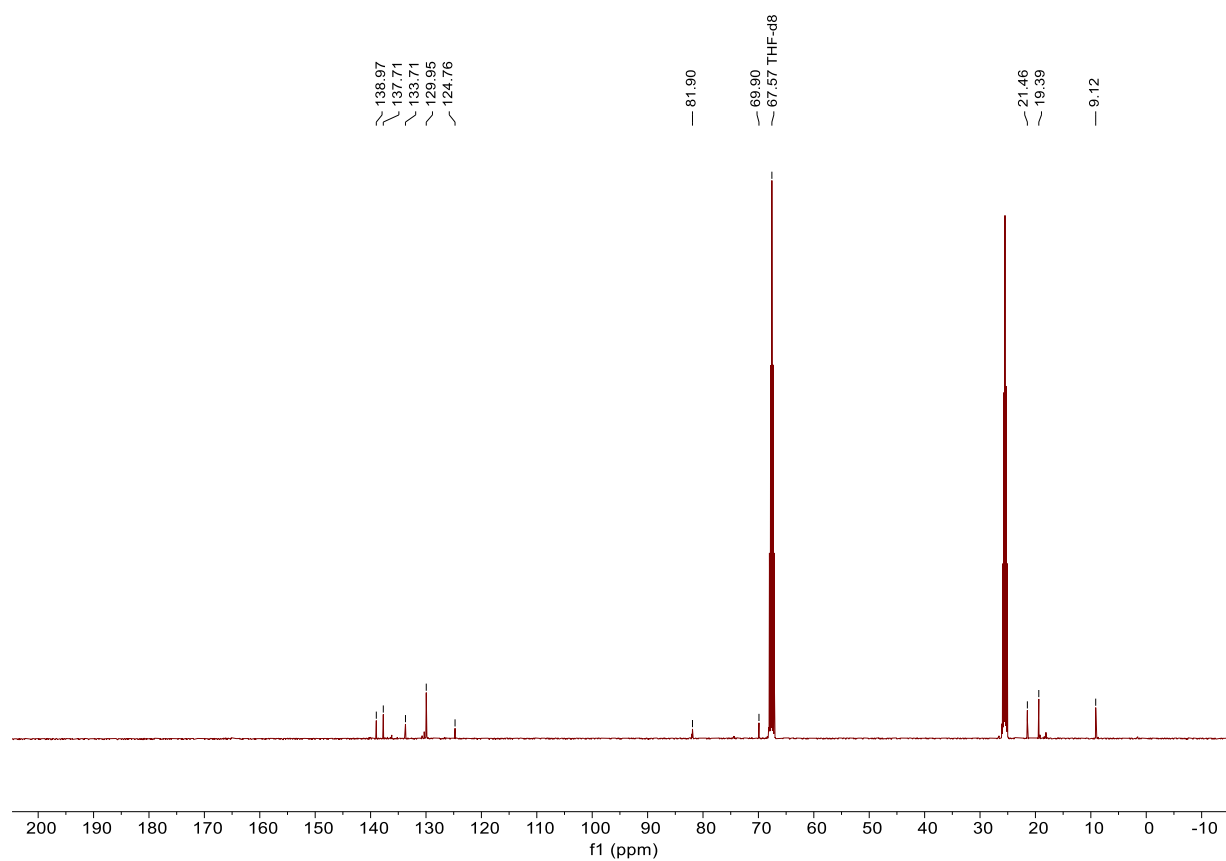

**Figure S57** <sup>13</sup>C NMR of **7b** in THF-d<sub>8</sub>.

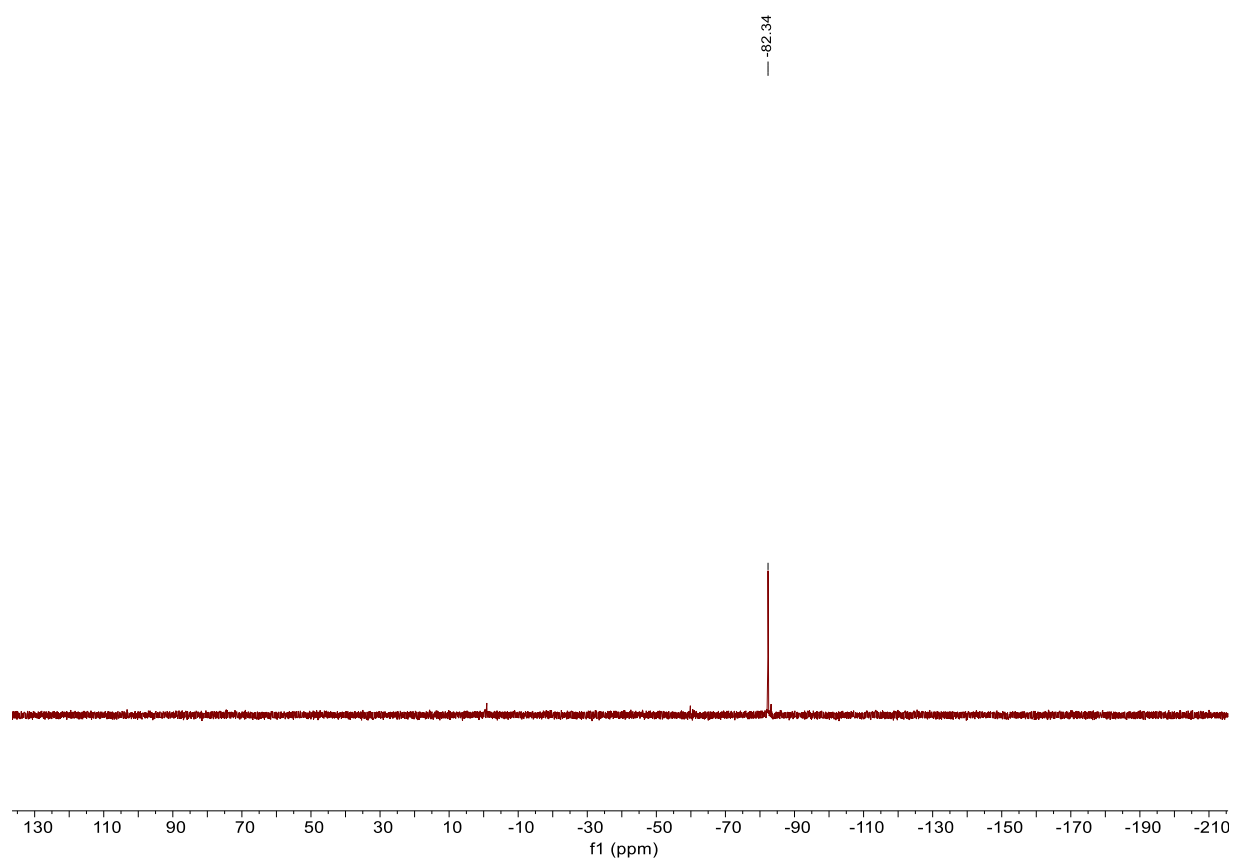

**Figure S58** <sup>31</sup>P NMR of **7b** in THF-d<sub>8</sub>.

## 1.14 Transmetalation

In a J. Young NMR tube, complex **5c** (9.0 mg, 7.33  $\mu\text{mol}$ , 1.0 eq) was dissolved in THF- $d_8$  and CuCl (mg, 7.33  $\mu\text{mol}$ , 1.0 eq) was added. Comparison of  $^1\text{H}$  and  $^{31}\text{P}$  NMR shifts to the NMR shifts of **6** showed quantitative conversion to the CuCl complex.

## 1.15 Sn(II) Transfer to bisNHI

Complex **5a** (30.0 mg, 24.31  $\mu\text{mol}$ , 1.0 eq) was dissolved in THF- $d_8$  and bisNHI (16.2 mg, 24.31  $\mu\text{mol}$ , 1.0 eq) was added. A crystalline precipitate was formed immediately.  $^{31}\text{P}$  NMR showed full conversion of complex **5a** to the free bisNHCP **3b**. The precipitate was dissolved in  $\text{CD}_3\text{CN}$ . Comparing the  $^1\text{H}$  and  $^{119}\text{Sn}$  NMR shifts to the literature confirmed the formation of the bisNHI supported stannylumylidene.<sup>S8</sup>

## 2. X-Ray Crystallographic Details

The X-ray intensity data were recorded on a Bruker D8 Venture Duo IMS system equipped with a Helios optic monochromator, a Mo IMS microsource ( $\lambda = 0.71073 \text{ \AA}$ ) and a Cu IMS microsource ( $\lambda = 1.54178 \text{ \AA}$ ). The data collection was performed, using the APEX III software package<sup>S9</sup> on single crystals coated with Fomblin<sup>®</sup> Y as perfluorinated ether. The single crystal was picked on a MiTiGen MicroMount microsampling tool, transferred to the diffractometer and measured frozen under a stream of 100K cold nitrogen. A matrix scan was used to determine the initial lattice parameters. Reflections were merged and corrected for Lorenz and polarization effects, scan speed, and background using SAINT.<sup>S10</sup> Absorption corrections, including odd and even ordered spherical harmonics were performed using SADABS.<sup>S10</sup> Space group assignments were based upon systematic absences, E statistics, and successful refinement of the structures. Structures were solved by direct methods with the aid of successive difference Fourier maps and were refined against all data using the APEX III software in conjunction with SHELXL-2014<sup>S11</sup> and SHELXLE.<sup>S12</sup> H atoms were placed in calculated positions and refined using a riding model, with methylene and aromatic C–H distances of 0.99 and 0.95  $\text{\AA}$ , respectively, and Uiso(H) =

1.2·Ueq(C). Non-hydrogen atoms were refined with anisotropic displacement parameters. Full-matrix least-squares refinements were carried out by minimizing  $\Sigma w(\text{Fo}^2 - \text{Fc}^2)^2$  with the SHELXL weighting scheme.<sup>S13</sup> Neutral atom scattering factors for all atoms and anomalous dispersion corrections for the non-hydrogen atoms were taken from International Tables for Crystallography.<sup>S14</sup> The images of the crystal structures were generated by Mercury.<sup>S15</sup> The CCDC numbers CCDC-2105598 (**3a**), CCDC-2105599 (**3b**), and CCDC-2105600 (**5c**) contain the supplementary crystallographic data for the structures **3a**, **3b**, and **5c**. These data can be obtained free of charge from the Cambridge Crystallographic Data Centre via <https://www.ccdc.cam.ac.uk/structures/>.

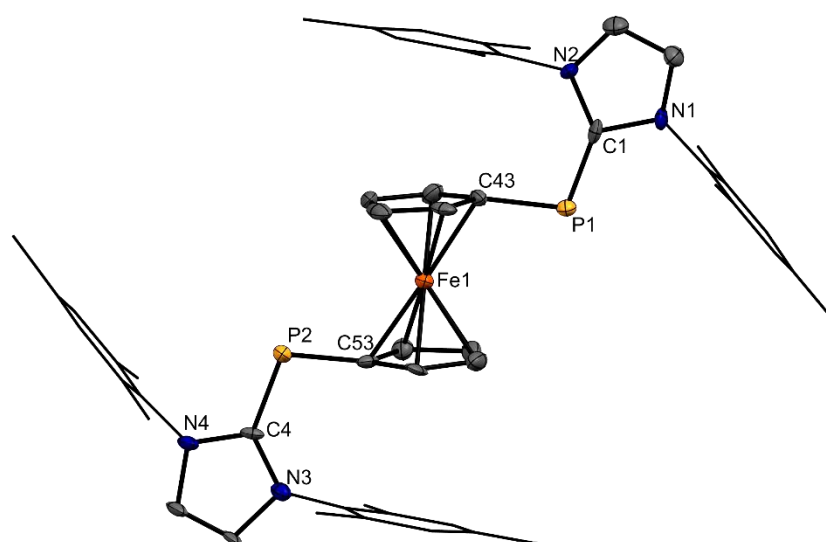

**Figure S59** Solid state plot of the molecular structure of bisNHCP **3a**. Translational ellipsoids are set to 50% probability level. For reasons of clarity, hydrogens are omitted and mesityl groups are depicted in wireframe models. Selected bond lengths [Å] and angles [°]: P1–C1 1.731(10), P2–C4 1.808(10), P1–C43 1.863(10), P2–C53 1.803(10), C1–P1–C43 102.6(4), C4–P2–C53 103.6(4).

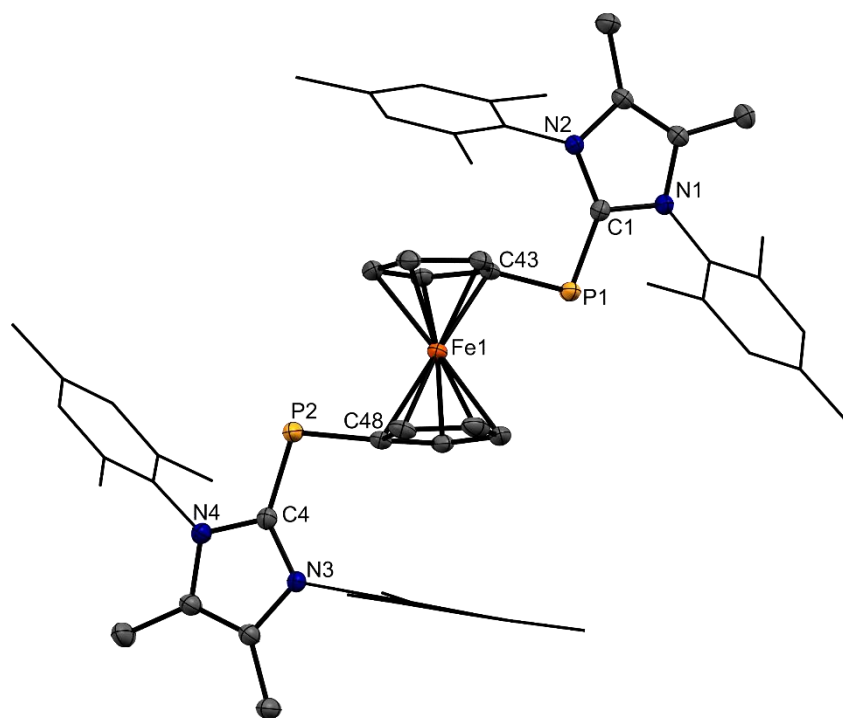

**Figure S60** Solid state plot of the molecular structure of bisNHCP **3b**. Translational ellipsoids are set to 50% probability level. For reasons of clarity, hydrogens are omitted and mesityl groups are depicted in wireframe models. Selected bond lengths [Å] and angles [°]: P1–C1 1.7696(18), P2–C4 1.7704(19), P1–C43 1.8319(16), P2–C48 1.8220(17), C1–P1–C43 103.33(8), C4–P2–C48 102.92(8).

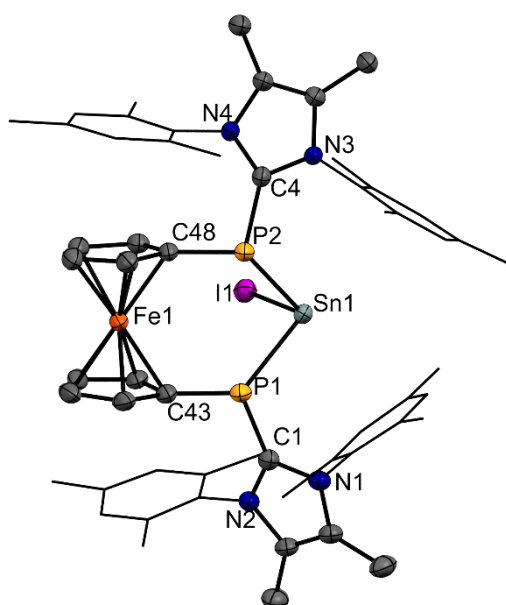

**Figure S61** Solid state plot of the molecular structure of stannilymylidene **5c**. Translational ellipsoids are set to 50% probability level. For reasons of clarity, hydrogens and the counter ion are omitted and mesityl groups are depicted in wireframe models. Selected bond lengths [Å] and angles [°]: P1–Sn1 2.645(5), P2–Sn1 2.659(4), P1–C1 1.824(4), P2–C4 1.828(4), P1–C43 1.809(4), P2–C48 1.817(4), I1–Sn1–P1 104.68(18), I1–Sn1–P2 102.25(14), P1–Sn1–P2 78.73(13).

**Table S1** Crystal data and structure refinement for compound **3a**, **3b**, **5c**.

| Compound #                           | <b>3a</b>                                                                                                                 | <b>3b</b>                                                                                                                    | <b>5c</b>                                                                                                       |
|--------------------------------------|---------------------------------------------------------------------------------------------------------------------------|------------------------------------------------------------------------------------------------------------------------------|-----------------------------------------------------------------------------------------------------------------|
| Chemical formula                     | C52 H56 Fe N4 P2, C4 H10 O                                                                                                | C56 H64 Fe N4 P2, 2(C4 H10 O)                                                                                                | C56 H64 Fe I N4 P2 Sn, C4 H8 O, I                                                                               |
| Formula weight                       | 928.92 g/mol                                                                                                              | 1059.14 g/mol                                                                                                                | 1355.52 g/mol                                                                                                   |
| Temperature                          | 100 K                                                                                                                     | 100 K                                                                                                                        | 100 K                                                                                                           |
| Wavelength                           | 0.71073 Å                                                                                                                 | 0.71073 Å                                                                                                                    | 1.54178 Å                                                                                                       |
| Crystal size                         | 0.319 x 0.276 x 0.092 mm                                                                                                  | 0.692 x 0.543 x 0.351 mm                                                                                                     | 0.132 x 0.102 x 0.099 mm                                                                                        |
| Crystal habit                        | clear orange fragment                                                                                                     | clear orange-yellow fragment                                                                                                 | clear yellow fragment                                                                                           |
| Crystal system                       | triclinic                                                                                                                 | triclinic                                                                                                                    | monoclinic                                                                                                      |
| Space group                          | P -1                                                                                                                      | P -1                                                                                                                         | P 21/c                                                                                                          |
| Unit cell dimensions                 | a = 9.866(5) Å; $\alpha$ = 101.033(19)°<br>b = 10.771(5) Å; $\beta$ = 101.83(3)°<br>c = 12.093(6) Å; $\gamma$ = 91.21(2)° | a = 14.341(5) Å; $\alpha$ = 80.658(13)°<br>b = 14.789(4) Å; $\beta$ = 79.157(15)°<br>c = 15.604(6) Å; $\gamma$ = 66.634(12)° | a = 13.8207(4) Å; $\alpha$ = 90°<br>b = 13.9298(4) Å; $\beta$ = 93.984(2)°<br>c = 34.6173(10) Å; $\gamma$ = 90° |
| Volume                               | 1232.1(11) Å <sup>3</sup>                                                                                                 | 2969.6(18) Å <sup>3</sup>                                                                                                    | 6648.4(3) Å <sup>3</sup>                                                                                        |
| Z                                    | 1                                                                                                                         | 2                                                                                                                            | 4                                                                                                               |
| Density (calculated)                 | 1.252 g/cm <sup>3</sup>                                                                                                   | 1.184 g/cm <sup>3</sup>                                                                                                      | 1.354 g/cm <sup>3</sup>                                                                                         |
| Radiation source                     | IMS microsource                                                                                                           | IMS microsource                                                                                                              | IMS microsource                                                                                                 |
| Theta range for data collection      | 2.11 to 25.34°                                                                                                            | 1.94 to 25.33°                                                                                                               | 3.20 to 66.89°                                                                                                  |
| Index ranges                         | -11<=h<=11, -12<=k<=12,<br>-14<=l<=14                                                                                     | -17<=h<=17, -16<=k<=17,<br>-18<=l<=18                                                                                        | -16<=h<=14, -16<=k<=16,<br>-41<=l<=41                                                                           |
| Reflections collected                | 22312                                                                                                                     | 174163                                                                                                                       | 111370                                                                                                          |
| Independent reflections              | 8496                                                                                                                      | 10815                                                                                                                        | 11802                                                                                                           |
| Completeness                         | 0.996                                                                                                                     | 0.997                                                                                                                        | 0.997                                                                                                           |
| Absorption correction                | Multi-Scan                                                                                                                | Multi-Scan                                                                                                                   | Multi-Scan                                                                                                      |
| Max. and min. transmission           | 0.7452 and 0.6648                                                                                                         | 0.7453 and 0.6683                                                                                                            | 0.7528 and 0.5144                                                                                               |
| Refinement method                    | Full-matrix least-squares on F <sup>2</sup>                                                                               | Full-matrix least-squares on F <sup>2</sup>                                                                                  | Full-matrix least-squares on F <sup>2</sup>                                                                     |
| Function minimized                   | $\sum w(F_o^2 - F_c^2)^2$                                                                                                 | $\sum w(F_o^2 - F_c^2)^2$                                                                                                    | $\sum w(F_o^2 - F_c^2)^2$                                                                                       |
| Data / restraints / parameters       | 8496 / 982 / 590                                                                                                          | 10815 / 0 / 678                                                                                                              | 11802 / 13 / 675                                                                                                |
| Goodness-of-fit on F <sup>2</sup>    | 1.010                                                                                                                     | 1.003                                                                                                                        | 1.012                                                                                                           |
| Final R indices [ $I > 2\sigma(I)$ ] | R1 = 0.0334, wR2 = 0.0786                                                                                                 | R1 = 0.0314, wR2 = 0.0876                                                                                                    | R1 = 0.0421, wR2 = 0.1140                                                                                       |
| R indices (all data)                 | R1 = 0.0451, wR2 = 0.0851                                                                                                 | R1 = 0.0345, wR2 = 0.0899                                                                                                    | R1 = 0.0545, wR2 = 0.1251                                                                                       |
| Largest diff. peak and hole          | 0.251 and -0.248 eÅ <sup>-3</sup>                                                                                         | 0.528 and -0.308 eÅ <sup>-3</sup>                                                                                            | 1.781 and -1.741 eÅ <sup>-3</sup>                                                                               |

### 3. Computational Details

Calculations were carried out using Gaussian 16 software,<sup>S16</sup> at B3PW91<sup>S17</sup>-D3<sup>S18</sup> level of theory with [4333111/433111/43] basis set augmented by two d polarization functions (d exponents 0.253 and 0.078) for Sn (see below);<sup>S19</sup> 6-311+G(d,p) basis set for P,<sup>2</sup> s6-31g\* basis set for Fe and Cu, 6-311G(d,p) for basis sets for Cl, Br, I, and 6-31G(d,p) basis set for other atoms.<sup>S20</sup> The conductor-like polarizable continuum model (CPCM) was used to account for the solvent effects. The stationary points were verified by analytical frequency calculations. NBO analyses were performed using the NBO 7 software.<sup>S21</sup> QTAIM calculation were done using the Miltiwn software.<sup>S22</sup>

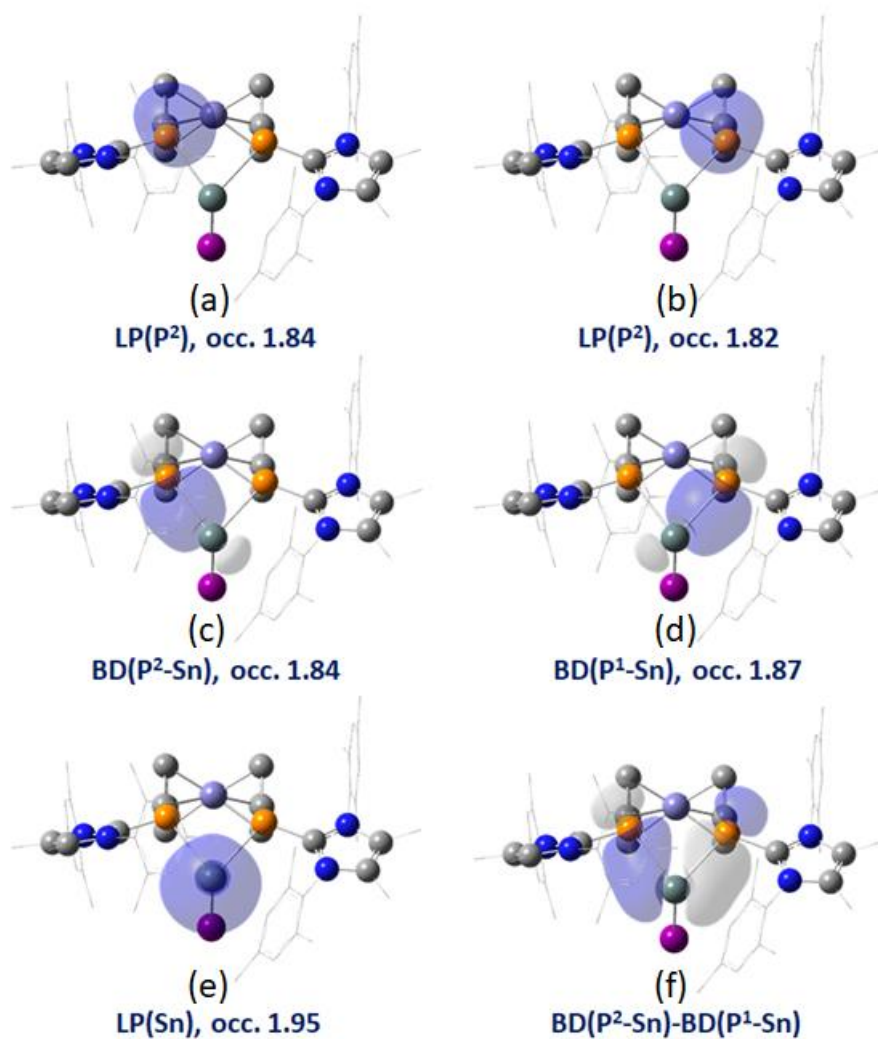

**Figure S61.** Selected NBO of **6**. (a) and (b) are the lone pairs of the phosphinidene centres. (c) and (d) are the P-Sn bonds. Subtraction of (c) and (d) yields (f) that corresponds to HOMO-1. (e) is the lone pair of Sn.

4333111/433111/43 basis set augmented by two d polarization functions (d exponents 0.253 and 0.078) for Sn in Gaussian format.

Sn 0

```
s 4 1.00
    37472.012    0.16625195E-01
    5648.8845    0.11693876
    1282.9402    0.43179058
    346.45090    0.56561483
```

```
s 3 1.00
```

|     |                |                 |
|-----|----------------|-----------------|
|     | 516.78654      | -0.11389480     |
|     | 59.928116      | 0.64603107      |
|     | 26.048741      | 0.42625579      |
| s 3 | 1.00           |                 |
|     | 47.977453      | -0.27270744     |
|     | 8.7546722      | 0.84987426      |
|     | 4.0102331      | 0.30296902      |
| s 3 | 1.00           |                 |
|     | 7.5198796      | 0.34211658      |
|     | 1.7271022      | -0.80241707     |
|     | 0.77274433     | -0.40406798     |
| s 1 | 1.00           |                 |
|     | 1.1386522      | -0.20454514     |
| s 1 | 1.00           |                 |
|     | 0.17346487     | 0.71113158      |
| s 1 | 1.00           |                 |
|     | 0.66274942E-01 | 0.41257362      |
| p 4 | 1.00           |                 |
|     | 1745.5260      | 0.24426685E-01  |
|     | 410.51366      | 0.16656335      |
|     | 128.31139      | 0.49415429      |
|     | 44.903462      | 0.47526995      |
| p 3 | 1.00           |                 |
|     | 140.77605      | -0.24768418E-01 |
|     | 18.242647      | 0.47906186      |
|     | 7.1374774      | 0.58978085      |
| p 3 | 1.00           |                 |
|     | 2.9465525      | 0.42389675      |
|     | 1.2795029      | 0.53117256      |
|     | 0.54560639     | 0.12762194      |



p 1 1.00  
0.25902160 0.33944667

p 1 1.00  
0.10239424 0.54968903

p 1 1.00  
0.41491833E-01 0.21901539

d 4 1.00  
201.37580 0.39987711E-01  
58.454606 0.22658972  
20.557877 0.52423023  
7.4534071 0.42264248

d 3 1.00  
4.6147167 0.27827403  
1.6488579 0.56541336  
0.56081639 0.34880807

d 1 1.00  
0.253 1.0

d 1 1.00  
0.078 1.0

\*\*\*\*

Cartesian coordinates and energies ( $E_h$ ) of **3a**

E(RB3PW91) = -4179.94244992

Sum of electronic and zero-point Energies= -4178.987830  
Sum of electronic and thermal Energies= -4178.927906  
Sum of electronic and thermal Enthalpies= -4178.926962  
Sum of electronic and thermal Free Energies= -4179.090832

|    |              |              |              |
|----|--------------|--------------|--------------|
| Fe | -0.042433000 | -0.279393000 | -0.909187000 |
| P  | -3.234519000 | -0.244304000 | 0.233352000  |
| P  | 3.225916000  | 0.243390000  | -0.206537000 |
| N  | -5.859324000 | 0.584046000  | 0.330467000  |
| N  | -4.634867000 | 2.229155000  | -0.397158000 |
| N  | 4.647588000  | -2.201722000 | 0.479096000  |
| N  | 5.667264000  | -0.332975000 | 0.929767000  |
| C  | -4.553477000 | 0.916955000  | 0.023568000  |

|   |              |              |              |
|---|--------------|--------------|--------------|
| C | -6.712426000 | 1.654417000  | 0.100810000  |
| C | -5.955337000 | 2.674328000  | -0.354648000 |
| C | 4.492805000  | -0.832556000 | 0.399842000  |
| C | 5.878285000  | -2.521354000 | 1.050891000  |
| C | 6.510988000  | -1.361467000 | 1.325431000  |
| C | -6.275403000 | -0.693047000 | 0.812043000  |
| C | -6.635032000 | -1.678937000 | -0.114485000 |
| C | -7.049009000 | -2.915534000 | 0.380619000  |
| C | -7.103487000 | -3.175228000 | 1.753051000  |
| C | -6.725056000 | -2.166376000 | 2.643236000  |
| C | -6.303268000 | -0.914612000 | 2.193982000  |
| C | -6.529749000 | -1.402119000 | -1.587212000 |
| C | -7.587035000 | -4.507181000 | 2.262942000  |
| C | -5.854534000 | 0.163277000  | 3.140821000  |
| C | -3.543976000 | 3.127008000  | -0.611016000 |
| C | -3.147761000 | 3.414780000  | -1.920511000 |
| C | -2.088694000 | 4.303872000  | -2.098755000 |
| C | -1.438729000 | 4.897542000  | -1.014334000 |
| C | -1.882122000 | 4.601818000  | 0.276422000  |
| C | -2.933687000 | 3.714151000  | 0.503493000  |
| C | -3.837667000 | 2.758150000  | -3.082114000 |
| C | -0.246202000 | 5.788875000  | -1.232598000 |
| C | -3.369252000 | 3.340887000  | 1.891574000  |
| C | 3.822435000  | -3.191217000 | -0.138507000 |
| C | 3.972565000  | -3.425959000 | -1.510049000 |
| C | 3.172147000  | -4.408728000 | -2.092689000 |
| C | 2.244061000  | -5.136028000 | -1.344911000 |
| C | 2.139427000  | -4.881750000 | 0.024626000  |
| C | 2.921967000  | -3.913150000 | 0.651176000  |
| C | 4.926575000  | -2.597876000 | -2.322229000 |
| C | 1.331937000  | -6.133731000 | -2.006095000 |
| C | 2.800580000  | -3.623497000 | 2.120179000  |
| C | 5.966139000  | 1.056258000  | 1.058999000  |
| C | 6.626903000  | 1.702603000  | 0.007748000  |
| C | 6.925865000  | 3.056637000  | 0.162395000  |
| C | 6.572825000  | 3.757418000  | 1.318932000  |
| C | 5.907790000  | 3.074952000  | 2.341593000  |
| C | 5.589540000  | 1.721271000  | 2.231928000  |
| C | 6.967234000  | 0.948505000  | -1.247376000 |
| C | 6.870957000  | 5.228152000  | 1.446314000  |
| C | 4.838739000  | 0.987017000  | 3.305972000  |
| C | -1.872821000 | 0.603499000  | -0.654822000 |
| C | -1.557286000 | 0.434967000  | -2.047695000 |
| C | -0.351765000 | 1.138639000  | -2.335894000 |
| C | 0.102575000  | 1.739579000  | -1.124655000 |
| C | -0.819180000 | 1.401660000  | -0.094989000 |
| C | 1.372193000  | -1.541620000 | -1.624532000 |
| C | 0.169491000  | -2.254746000 | -1.356371000 |

|   |              |              |              |
|---|--------------|--------------|--------------|
| C | -0.143937000 | -2.084753000 | 0.024690000  |
| C | 0.867804000  | -1.265739000 | 0.603149000  |
| C | 1.832616000  | -0.931097000 | -0.409559000 |
| H | -7.772632000 | 1.571600000  | 0.278283000  |
| H | -6.209445000 | 3.680615000  | -0.646437000 |
| H | 6.173441000  | -3.548846000 | 1.190309000  |
| H | 7.471382000  | -1.156169000 | 1.770290000  |
| H | -7.328027000 | -3.697506000 | -0.322396000 |
| H | -6.750781000 | -2.360887000 | 3.713319000  |
| H | -5.484716000 | -1.197223000 | -1.849543000 |
| H | -7.114459000 | -0.521082000 | -1.873816000 |
| H | -6.877701000 | -2.253784000 | -2.176895000 |
| H | -7.132695000 | -4.756787000 | 3.226332000  |
| H | -7.356155000 | -5.313191000 | 1.560101000  |
| H | -8.674722000 | -4.499412000 | 2.406009000  |
| H | -4.798456000 | 0.399851000  | 2.966118000  |
| H | -5.972154000 | -0.149683000 | 4.181155000  |
| H | -6.420575000 | 1.089529000  | 2.993139000  |
| H | -1.747858000 | 4.520041000  | -3.108645000 |
| H | -1.382709000 | 5.055382000  | 1.129904000  |
| H | -3.308629000 | 2.957265000  | -4.017052000 |
| H | -4.869036000 | 3.114136000  | -3.190035000 |
| H | -3.883020000 | 1.674945000  | -2.936339000 |
| H | -0.117018000 | 6.500909000  | -0.412055000 |
| H | -0.328998000 | 6.354293000  | -2.165892000 |
| H | 0.669190000  | 5.187654000  | -1.294200000 |
| H | -2.887463000 | 3.972706000  | 2.641901000  |
| H | -3.108974000 | 2.294182000  | 2.096175000  |
| H | -4.454941000 | 3.425436000  | 2.010796000  |
| H | 3.262911000  | -4.596110000 | -3.160541000 |
| H | 1.414022000  | -5.435247000 | 0.616416000  |
| H | 4.568361000  | -1.561531000 | -2.377778000 |
| H | 5.025131000  | -2.988211000 | -3.338267000 |
| H | 5.921450000  | -2.563591000 | -1.864933000 |
| H | 1.132935000  | -6.991804000 | -1.356478000 |
| H | 1.751339000  | -6.506745000 | -2.945091000 |
| H | 0.365554000  | -5.668957000 | -2.236737000 |
| H | 3.692533000  | -3.949483000 | 2.668317000  |
| H | 1.932767000  | -4.129223000 | 2.549871000  |
| H | 2.691371000  | -2.548603000 | 2.290704000  |
| H | 7.440599000  | 3.577909000  | -0.641923000 |
| H | 5.624194000  | 3.610934000  | 3.244849000  |
| H | 7.507242000  | 1.581839000  | -1.955445000 |
| H | 6.050207000  | 0.591000000  | -1.730043000 |
| H | 7.582747000  | 0.067783000  | -1.033612000 |
| H | 7.029448000  | 5.517517000  | 2.489580000  |
| H | 6.035502000  | 5.827212000  | 1.064230000  |
| H | 7.761636000  | 5.509185000  | 0.876377000  |

|   |              |              |              |
|---|--------------|--------------|--------------|
| H | 5.387101000  | 0.102327000  | 3.647813000  |
| H | 3.876631000  | 0.639684000  | 2.910243000  |
| H | 4.649725000  | 1.630437000  | 4.168743000  |
| H | -2.132990000 | -0.162038000 | -2.743246000 |
| H | 0.155882000  | 1.175605000  | -3.291075000 |
| H | 1.019263000  | 2.300997000  | -0.997340000 |
| H | -0.738199000 | 1.682275000  | 0.946085000  |
| H | 1.863709000  | -1.456283000 | -2.584275000 |
| H | -0.426994000 | -2.796329000 | -2.078935000 |
| H | -1.027802000 | -2.458506000 | 0.525907000  |
| H | 0.893235000  | -0.911118000 | 1.625217000  |

Cartesian coordinates and energies ( $E_h$ ) of **3b**

E(RB3PW91) = -4337.20355951

Sum of electronic and zero-point Energies= -4336.137227

Sum of electronic and thermal Energies= -4336.070422

Sum of electronic and thermal Enthalpies= -4336.069478

Sum of electronic and thermal Free Energies= -4336.247372

|    |              |              |              |
|----|--------------|--------------|--------------|
| Fe | 0.000017000  | 0.000040000  | -1.169311000 |
| P  | 3.194138000  | 0.451108000  | -0.153558000 |
| P  | -3.194154000 | -0.451069000 | -0.153687000 |
| N  | 5.825020000  | -0.161799000 | 0.346077000  |
| N  | 4.730605000  | -2.014719000 | 0.079596000  |
| N  | -4.730641000 | 2.014727000  | 0.079830000  |
| N  | -5.824985000 | 0.161760000  | 0.346235000  |
| C  | 4.564573000  | -0.648602000 | 0.073523000  |
| C  | 6.745107000  | -1.198593000 | 0.527150000  |
| C  | 6.063953000  | -2.357748000 | 0.361285000  |
| C  | -4.564575000 | 0.648616000  | 0.073606000  |
| C  | -6.063977000 | 2.357699000  | 0.361645000  |
| C  | -6.745086000 | 1.198512000  | 0.527465000  |
| C  | 6.153110000  | 1.221714000  | 0.443042000  |
| C  | 6.556720000  | 1.903473000  | -0.711332000 |
| C  | 6.901324000  | 3.249262000  | -0.586402000 |
| C  | 6.848311000  | 3.908235000  | 0.645372000  |
| C  | 6.430547000  | 3.194048000  | 1.771753000  |
| C  | 6.074786000  | 1.847130000  | 1.693160000  |
| C  | 6.568265000  | 1.194603000  | -2.035724000 |
| C  | 7.260353000  | 5.352243000  | 0.760443000  |
| C  | 5.582601000  | 1.080837000  | 2.889039000  |
| C  | 3.692601000  | -2.992977000 | 0.048221000  |
| C  | 3.358758000  | -3.595455000 | -1.167980000 |

|   |              |              |              |
|---|--------------|--------------|--------------|
| C | 2.352884000  | -4.560831000 | -1.160887000 |
| C | 1.696944000  | -4.928094000 | 0.016470000  |
| C | 2.075734000  | -4.317788000 | 1.214351000  |
| C | 3.069609000  | -3.340297000 | 1.252175000  |
| C | 4.053531000  | -3.177285000 | -2.432317000 |
| C | 0.560562000  | -5.913773000 | -0.018890000 |
| C | 3.432954000  | -2.620941000 | 2.520334000  |
| C | -3.692683000 | 2.993024000  | 0.048281000  |
| C | -3.359009000 | 3.595433000  | -1.168004000 |
| C | -2.353160000 | 4.560829000  | -1.161099000 |
| C | -1.697086000 | 4.928185000  | 0.016160000  |
| C | -2.075738000 | 4.317980000  | 1.214132000  |
| C | -3.069582000 | 3.340458000  | 1.252139000  |
| C | -4.053934000 | 3.177135000  | -2.432214000 |
| C | -0.560666000 | 5.913807000  | -0.019449000 |
| C | -3.432794000 | 2.621192000  | 2.520389000  |
| C | -6.153052000 | -1.221770000 | 0.443037000  |
| C | -6.556717000 | -1.903377000 | -0.711388000 |
| C | -6.901278000 | -3.249210000 | -0.586611000 |
| C | -6.848159000 | -3.908339000 | 0.645054000  |
| C | -6.430329000 | -3.194283000 | 1.771516000  |
| C | -6.074625000 | -1.847359000 | 1.693081000  |
| C | -6.568381000 | -1.194345000 | -2.035691000 |
| C | -7.260153000 | -5.352361000 | 0.760124000  |
| C | -5.582340000 | -1.081218000 | 2.889016000  |
| C | 1.880967000  | -0.687850000 | -0.738569000 |
| C | 1.534393000  | -0.924679000 | -2.114269000 |
| C | 0.365136000  | -1.738154000 | -2.162873000 |
| C | -0.036717000 | -2.004876000 | -0.820464000 |
| C | 0.880729000  | -1.351921000 | 0.049165000  |
| C | -1.880969000 | 0.687906000  | -0.738640000 |
| C | -0.880772000 | 1.351987000  | 0.049133000  |
| C | 0.036706000  | 2.004949000  | -0.820458000 |
| C | -0.365092000 | 1.738228000  | -2.162885000 |
| C | -1.534338000 | 0.924737000  | -2.114328000 |
| C | 8.173003000  | -0.914955000 | 0.824019000  |
| C | 6.490520000  | -3.778224000 | 0.448328000  |
| C | -6.490570000 | 3.778159000  | 0.448830000  |
| C | -8.172948000 | 0.914814000  | 0.824440000  |
| H | 7.212064000  | 3.798327000  | -1.472788000 |
| H | 6.372666000  | 3.699413000  | 2.733508000  |
| H | 6.951185000  | 1.840763000  | -2.829479000 |
| H | 5.548776000  | 0.884848000  | -2.295210000 |
| H | 7.181142000  | 0.286995000  | -2.002481000 |
| H | 7.044736000  | 5.904840000  | -0.158935000 |

|   |              |              |              |
|---|--------------|--------------|--------------|
| H | 8.337909000  | 5.437913000  | 0.948077000  |
| H | 6.744343000  | 5.852276000  | 1.585385000  |
| H | 4.541851000  | 0.774534000  | 2.731469000  |
| H | 5.633796000  | 1.686649000  | 3.797115000  |
| H | 6.163777000  | 0.166248000  | 3.050869000  |
| H | 2.058112000  | -5.020943000 | -2.101207000 |
| H | 1.566791000  | -4.589241000 | 2.136779000  |
| H | 3.584242000  | -3.631230000 | -3.308336000 |
| H | 5.111873000  | -3.463521000 | -2.424086000 |
| H | 4.015153000  | -2.089831000 | -2.545396000 |
| H | -0.378858000 | -5.398682000 | -0.253961000 |
| H | 0.428572000  | -6.415269000 | 0.944431000  |
| H | 0.713387000  | -6.680087000 | -0.785153000 |
| H | 4.511268000  | -2.656231000 | 2.712782000  |
| H | 2.913351000  | -3.046890000 | 3.382194000  |
| H | 3.162923000  | -1.560530000 | 2.438386000  |
| H | -2.058527000 | 5.020912000  | -2.101477000 |
| H | -1.566710000 | 4.589526000  | 2.136485000  |
| H | -3.585090000 | 3.631405000  | -3.308302000 |
| H | -5.112405000 | 3.462876000  | -2.423645000 |
| H | -4.015100000 | 2.089709000  | -2.545440000 |
| H | -0.713859000 | 6.680445000  | -0.785314000 |
| H | 0.378564000  | 5.398710000  | -0.255286000 |
| H | -0.428062000 | 6.414890000  | 0.944000000  |
| H | -3.163004000 | 1.560722000  | 2.438407000  |
| H | -4.511058000 | 2.656712000  | 2.713078000  |
| H | -2.912914000 | 3.047049000  | 3.382127000  |
| H | -7.212060000 | -3.798158000 | -1.473053000 |
| H | -6.372363000 | -3.699784000 | 2.733196000  |
| H | -5.548930000 | -0.884490000 | -2.295203000 |
| H | -7.181317000 | -0.286781000 | -2.002300000 |
| H | -6.951307000 | -1.840431000 | -2.829503000 |
| H | -7.048290000 | -5.904039000 | -0.160665000 |
| H | -8.336978000 | -5.437934000 | 0.951957000  |
| H | -6.741056000 | -5.853410000 | 1.582522000  |
| H | -4.541508000 | -0.775159000 | 2.731506000  |
| H | -5.633734000 | -1.687044000 | 3.797072000  |
| H | -6.163296000 | -0.166490000 | 3.050830000  |
| H | 2.065586000  | -0.515228000 | -2.963901000 |
| H | -0.154435000 | -2.060764000 | -3.055918000 |
| H | -0.919949000 | -2.552712000 | -0.517835000 |
| H | 0.829100000  | -1.336023000 | 1.129021000  |
| H | -0.829178000 | 1.336093000  | 1.128991000  |
| H | 0.919899000  | 2.552832000  | -0.517800000 |
| H | 0.154496000  | 2.060865000  | -3.055911000 |

|   |              |              |              |
|---|--------------|--------------|--------------|
| H | -2.065508000 | 0.515284000  | -2.963973000 |
| H | 8.640614000  | -0.333343000 | 0.021377000  |
| H | 8.731036000  | -1.845947000 | 0.942078000  |
| H | 8.279756000  | -0.330131000 | 1.744536000  |
| H | 6.316263000  | -4.310015000 | -0.493736000 |
| H | 5.932472000  | -4.314672000 | 1.224007000  |
| H | 7.554817000  | -3.841296000 | 0.684534000  |
| H | -6.316361000 | 4.310035000  | -0.493196000 |
| H | -5.932501000 | 4.314558000  | 1.224529000  |
| H | -7.554857000 | 3.841189000  | 0.685091000  |
| H | -8.731046000 | 1.845785000  | 0.942360000  |
| H | -8.279633000 | 0.330138000  | 1.745062000  |
| H | -8.640536000 | 0.333030000  | 0.021911000  |

Cartesian coordinates and energies ( $E_h$ ) of **3b**, scrf=(cpcm,solvent=thf)

E(RB3PW91) = -4337.22795778

Sum of electronic and zero-point Energies= -4336.162337

Sum of electronic and thermal Energies= -4336.095499

Sum of electronic and thermal Enthalpies= -4336.094555

Sum of electronic and thermal Free Energies= -4336.271594

|    |              |              |              |
|----|--------------|--------------|--------------|
| Fe | 0.000028000  | 0.000029000  | -1.162557000 |
| P  | -3.202270000 | -0.461640000 | -0.149906000 |
| P  | 3.202307000  | 0.461652000  | -0.149852000 |
| N  | -5.840015000 | 0.140216000  | 0.377055000  |
| N  | -4.752620000 | 1.993680000  | 0.131021000  |
| N  | 4.752587000  | -1.993696000 | 0.131229000  |
| N  | 5.840019000  | -0.140249000 | 0.377226000  |
| C  | -4.589775000 | 0.634887000  | 0.104943000  |
| C  | -6.764117000 | 1.170678000  | 0.575010000  |
| C  | -6.085216000 | 2.333859000  | 0.419134000  |
| C  | 4.589776000  | -0.634900000 | 0.105089000  |
| C  | 6.085165000  | -2.333896000 | 0.419396000  |
| C  | 6.764083000  | -1.170726000 | 0.575280000  |
| C  | -6.160462000 | -1.247816000 | 0.456168000  |
| C  | -6.578487000 | -1.910898000 | -0.704689000 |
| C  | -6.899737000 | -3.265147000 | -0.600098000 |
| C  | -6.816066000 | -3.947079000 | 0.618825000  |
| C  | -6.395317000 | -3.246240000 | 1.753962000  |
| C  | -6.062547000 | -1.891433000 | 1.696274000  |
| C  | -6.650466000 | -1.172131000 | -2.011569000 |
| C  | -7.204214000 | -5.398988000 | 0.712890000  |
| C  | -5.596949000 | -1.133108000 | 2.908413000  |

|   |              |              |              |
|---|--------------|--------------|--------------|
| C | -3.722938000 | 2.980201000  | 0.053253000  |
| C | -3.428071000 | 3.559159000  | -1.184466000 |
| C | -2.438271000 | 4.541315000  | -1.221579000 |
| C | -1.762347000 | 4.945998000  | -0.066963000 |
| C | -2.103428000 | 4.355981000  | 1.153276000  |
| C | -3.081215000 | 3.364238000  | 1.235846000  |
| C | -4.150823000 | 3.107855000  | -2.421638000 |
| C | -0.651323000 | 5.958111000  | -0.147512000 |
| C | -3.415873000 | 2.680971000  | 2.531786000  |
| C | 3.722882000  | -2.980194000 | 0.053469000  |
| C | 3.428029000  | -3.559186000 | -1.184238000 |
| C | 2.438209000  | -4.541322000 | -1.221339000 |
| C | 1.762251000  | -4.945953000 | -0.066725000 |
| C | 2.103316000  | -4.355901000 | 1.153502000  |
| C | 3.081122000  | -3.364177000 | 1.236061000  |
| C | 4.150813000  | -3.107934000 | -2.421410000 |
| C | 0.651206000  | -5.958042000 | -0.147265000 |
| C | 3.415766000  | -2.680872000 | 2.531985000  |
| C | 6.160497000  | 1.247777000  | 0.456296000  |
| C | 6.578623000  | 1.910796000  | -0.704553000 |
| C | 6.899899000  | 3.265049000  | -0.599996000 |
| C | 6.816152000  | 3.947033000  | 0.618886000  |
| C | 6.395298000  | 3.246249000  | 1.754026000  |
| C | 6.062504000  | 1.891454000  | 1.696372000  |
| C | 6.650691000  | 1.171976000  | -2.011398000 |
| C | 7.204323000  | 5.398934000  | 0.712974000  |
| C | 5.596788000  | 1.133188000  | 2.908503000  |
| C | -1.889944000 | 0.675799000  | -0.738382000 |
| C | -1.542589000 | 0.913298000  | -2.113480000 |
| C | -0.380616000 | 1.735934000  | -2.161474000 |
| C | 0.014327000  | 2.010116000  | -0.818756000 |
| C | -0.898929000 | 1.352002000  | 0.050449000  |
| C | 1.889996000  | -0.675764000 | -0.738406000 |
| C | 0.898975000  | -1.352015000 | 0.050377000  |
| C | -0.014273000 | -2.010079000 | -0.818874000 |
| C | 0.380680000  | -1.735818000 | -2.161573000 |
| C | 1.542652000  | -0.913184000 | -2.113522000 |
| C | -8.188628000 | 0.882041000  | 0.882690000  |
| C | -6.515909000 | 3.752246000  | 0.518475000  |
| C | 6.515822000  | -3.752291000 | 0.518800000  |
| C | 8.188583000  | -0.882112000 | 0.883031000  |
| H | -7.222076000 | -3.800869000 | -1.490264000 |
| H | -6.323490000 | -3.766609000 | 2.706489000  |
| H | -6.978085000 | -1.829389000 | -2.820251000 |
| H | -5.667507000 | -0.761804000 | -2.270522000 |



|   |              |              |              |
|---|--------------|--------------|--------------|
| H | -7.344499000 | -0.326226000 | -1.954946000 |
| H | -7.001904000 | -5.929099000 | -0.222291000 |
| H | -8.276507000 | -5.500485000 | 0.920141000  |
| H | -6.666597000 | -5.906526000 | 1.518895000  |
| H | -4.590013000 | -0.732291000 | 2.745773000  |
| H | -5.576883000 | -1.774837000 | 3.792190000  |
| H | -6.248683000 | -0.278279000 | 3.120208000  |
| H | -2.178670000 | 4.991380000  | -2.177087000 |
| H | -1.583039000 | 4.660610000  | 2.058674000  |
| H | -3.731478000 | 3.574362000  | -3.316001000 |
| H | -5.217586000 | 3.355126000  | -2.375643000 |
| H | -4.078067000 | 2.021452000  | -2.532560000 |
| H | 0.298597000  | 5.460920000  | -0.379626000 |
| H | -0.519779000 | 6.490570000  | 0.798877000  |
| H | -0.833242000 | 6.695346000  | -0.935253000 |
| H | -4.485921000 | 2.744389000  | 2.758926000  |
| H | -2.860127000 | 3.116867000  | 3.365165000  |
| H | -3.170092000 | 1.613683000  | 2.470668000  |
| H | 2.178619000  | -4.991414000 | -2.176838000 |
| H | 1.582899000  | -4.660488000 | 2.058899000  |
| H | 3.731477000  | -3.574460000 | -3.315766000 |
| H | 5.217571000  | -3.355222000 | -2.375387000 |
| H | 4.078080000  | -2.021532000 | -2.532366000 |
| H | 0.833132000  | -6.695315000 | -0.934970000 |
| H | -0.298695000 | -5.460838000 | -0.379429000 |
| H | 0.519620000  | -6.490458000 | 0.799143000  |
| H | 3.170007000  | -1.613580000 | 2.470824000  |
| H | 4.485808000  | -2.744303000 | 2.759150000  |
| H | 2.859993000  | -3.116728000 | 3.365366000  |
| H | 7.222321000  | 3.800720000  | -1.490161000 |
| H | 6.323408000  | 3.766666000  | 2.706523000  |
| H | 5.667743000  | 0.761664000  | -2.270415000 |
| H | 7.344699000  | 0.326057000  | -1.954685000 |
| H | 6.978393000  | 1.829194000  | -2.820079000 |
| H | 7.003385000  | 5.928748000  | -0.222666000 |
| H | 8.276327000  | 5.500389000  | 0.921735000  |
| H | 6.665624000  | 5.906802000  | 1.518055000  |
| H | 4.589849000  | 0.732404000  | 2.745802000  |
| H | 5.576680000  | 1.774949000  | 3.792256000  |
| H | 6.248474000  | 0.278342000  | 3.120375000  |
| H | -2.071904000 | 0.507350000  | -2.966278000 |
| H | 0.132816000  | 2.066932000  | -3.055308000 |
| H | 0.882891000  | 2.580588000  | -0.515453000 |
| H | -0.858265000 | 1.350862000  | 1.131220000  |
| H | 0.858302000  | -1.350937000 | 1.131149000  |

|   |              |              |              |
|---|--------------|--------------|--------------|
| H | -0.882839000 | -2.580570000 | -0.515611000 |
| H | -0.132744000 | -2.066766000 | -3.055430000 |
| H | 2.071974000  | -0.507186000 | -2.966292000 |
| H | -8.664097000 | 0.310842000  | 0.077874000  |
| H | -8.744239000 | 1.811844000  | 1.015496000  |
| H | -8.285296000 | 0.290938000  | 1.799818000  |
| H | -6.341824000 | 4.291393000  | -0.418964000 |
| H | -5.964737000 | 4.282014000  | 1.303119000  |
| H | -7.580814000 | 3.807567000  | 0.751100000  |
| H | 6.341766000  | -4.291466000 | -0.418627000 |
| H | 5.964602000  | -4.282019000 | 1.303438000  |
| H | 7.580715000  | -3.807628000 | 0.751476000  |
| H | 8.744166000  | -1.811924000 | 1.015895000  |
| H | 8.285214000  | -0.290983000 | 1.800147000  |
| H | 8.664108000  | -0.310948000 | 0.078224000  |

Cartesian coordinates and energies ( $E_h$ ) of **3b**, scrf=(cpcm,solvent=acetonitrile)

E(RB3PW91) = -4337.23224772

Sum of electronic and zero-point Energies= -4336.166696

Sum of electronic and thermal Energies= -4336.099846

Sum of electronic and thermal Enthalpies= -4336.098902

Sum of electronic and thermal Free Energies= -4336.275914

|    |              |              |              |
|----|--------------|--------------|--------------|
| Fe | 0.000009000  | -0.000041000 | -1.151608000 |
| P  | -3.204956000 | -0.463860000 | -0.140507000 |
| P  | 3.204915000  | 0.463825000  | -0.140367000 |
| N  | -5.847489000 | 0.136167000  | 0.374850000  |
| N  | -4.760155000 | 1.989429000  | 0.135125000  |
| N  | 4.760188000  | -1.989414000 | 0.135350000  |
| N  | 5.847454000  | -0.136109000 | 0.375050000  |
| C  | -4.597696000 | 0.631924000  | 0.108977000  |
| C  | -6.773418000 | 1.165718000  | 0.568924000  |
| C  | -6.094153000 | 2.329444000  | 0.416408000  |
| C  | 4.597682000  | -0.631915000 | 0.109169000  |
| C  | 6.094194000  | -2.329376000 | 0.416659000  |
| C  | 6.773416000  | -1.165624000 | 0.569158000  |
| C  | -6.166600000 | -1.252538000 | 0.452226000  |
| C  | -6.579039000 | -1.915577000 | -0.710807000 |
| C  | -6.896840000 | -3.270948000 | -0.608316000 |
| C  | -6.816294000 | -3.953499000 | 0.610710000  |
| C  | -6.402615000 | -3.251986000 | 1.748278000  |
| C  | -6.073568000 | -1.896019000 | 1.692908000  |
| C  | -6.652647000 | -1.175355000 | -2.016920000 |
| C  | -7.201282000 | -5.406318000 | 0.702422000  |

|   |              |              |              |
|---|--------------|--------------|--------------|
| C | -5.621761000 | -1.135841000 | 2.909257000  |
| C | -3.731349000 | 2.977045000  | 0.054450000  |
| C | -3.437336000 | 3.552278000  | -1.185264000 |
| C | -2.450177000 | 4.537125000  | -1.224966000 |
| C | -1.776470000 | 4.947983000  | -0.071083000 |
| C | -2.116723000 | 4.361079000  | 1.151047000  |
| C | -3.092095000 | 3.367073000  | 1.236416000  |
| C | -4.159335000 | 3.096550000  | -2.421294000 |
| C | -0.670018000 | 5.964998000  | -0.153883000 |
| C | -3.428596000 | 2.690491000  | 2.535416000  |
| C | 3.731420000  | -2.977071000 | 0.054681000  |
| C | 3.437438000  | -3.552332000 | -1.185027000 |
| C | 2.450325000  | -4.537225000 | -1.224721000 |
| C | 1.776634000  | -4.948101000 | -0.070835000 |
| C | 2.116857000  | -4.361168000 | 1.151289000  |
| C | 3.092181000  | -3.367115000 | 1.236650000  |
| C | 4.159419000  | -3.096582000 | -2.421060000 |
| C | 0.670230000  | -5.965169000 | -0.153627000 |
| C | 3.428648000  | -2.690505000 | 2.535643000  |
| C | 6.166516000  | 1.252609000  | 0.452400000  |
| C | 6.578950000  | 1.915634000  | -0.710636000 |
| C | 6.896703000  | 3.271024000  | -0.608169000 |
| C | 6.816113000  | 3.953596000  | 0.610837000  |
| C | 6.402437000  | 3.252090000  | 1.748417000  |
| C | 6.073440000  | 1.896116000  | 1.693072000  |
| C | 6.652605000  | 1.175391000  | -2.016734000 |
| C | 7.201045000  | 5.406429000  | 0.702569000  |
| C | 5.621636000  | 1.135945000  | 2.909427000  |
| C | -1.892122000 | 0.672704000  | -0.729361000 |
| C | -1.544077000 | 0.910450000  | -2.104134000 |
| C | -0.383938000 | 1.735386000  | -2.151490000 |
| C | 0.008997000  | 2.011066000  | -0.808581000 |
| C | -0.903671000 | 1.351734000  | 0.060136000  |
| C | 1.892120000  | -0.672771000 | -0.729249000 |
| C | 0.903631000  | -1.351778000 | 0.060221000  |
| C | -0.008994000 | -2.011138000 | -0.808520000 |
| C | 0.384006000  | -1.735499000 | -2.151419000 |
| C | 1.544142000  | -0.910560000 | -2.104031000 |
| C | -8.199149000 | 0.876714000  | 0.870382000  |
| C | -6.526264000 | 3.747518000  | 0.513376000  |
| C | 6.526353000  | -3.747433000 | 0.513662000  |
| C | 8.199134000  | -0.876564000 | 0.870626000  |
| H | -7.215308000 | -3.806728000 | -1.499807000 |
| H | -6.335059000 | -3.772354000 | 2.701083000  |
| H | -6.962513000 | -1.836521000 | -2.829327000 |

|   |              |              |              |
|---|--------------|--------------|--------------|
| H | -5.675955000 | -0.745952000 | -2.268281000 |
| H | -7.362623000 | -0.342575000 | -1.964038000 |
| H | -6.995119000 | -5.935264000 | -0.232530000 |
| H | -8.274054000 | -5.509604000 | 0.905933000  |
| H | -6.665735000 | -5.913093000 | 1.510233000  |
| H | -4.625053000 | -0.709564000 | 2.749040000  |
| H | -5.585745000 | -1.783146000 | 3.788377000  |
| H | -6.293263000 | -0.298390000 | 3.128570000  |
| H | -2.192268000 | 4.985756000  | -2.181610000 |
| H | -1.599159000 | 4.671493000  | 2.056084000  |
| H | -3.739009000 | 3.559340000  | -3.317081000 |
| H | -5.225770000 | 3.345305000  | -2.377105000 |
| H | -4.088078000 | 2.009626000  | -2.528349000 |
| H | 0.282684000  | 5.471946000  | -0.383604000 |
| H | -0.541934000 | 6.500971000  | 0.790947000  |
| H | -0.854751000 | 6.698659000  | -0.944235000 |
| H | -4.498226000 | 2.759266000  | 2.762733000  |
| H | -2.871074000 | 3.128163000  | 3.366595000  |
| H | -3.187058000 | 1.621991000  | 2.479614000  |
| H | 2.192439000  | -4.985879000 | -2.181360000 |
| H | 1.599304000  | -4.671596000 | 2.056328000  |
| H | 3.739122000  | -3.559408000 | -3.316842000 |
| H | 5.225867000  | -3.345279000 | -2.376863000 |
| H | 4.088103000  | -2.009664000 | -2.528131000 |
| H | 0.855004000  | -6.698835000 | -0.943966000 |
| H | -0.282493000 | -5.472166000 | -0.383364000 |
| H | 0.542164000  | -6.501133000 | 0.791211000  |
| H | 3.187058000  | -1.622016000 | 2.479831000  |
| H | 4.498281000  | -2.759226000 | 2.762962000  |
| H | 2.871146000  | -3.128196000 | 3.366826000  |
| H | 7.215168000  | 3.806792000  | -1.499666000 |
| H | 6.334845000  | 3.772480000  | 2.701208000  |
| H | 5.675931000  | 0.745954000  | -2.268105000 |
| H | 7.362605000  | 0.342633000  | -1.963823000 |
| H | 6.962467000  | 1.836552000  | -2.829147000 |
| H | 6.995857000  | 5.935151000  | -0.232721000 |
| H | 8.273604000  | 5.509738000  | 0.907185000  |
| H | 6.664680000  | 5.913414000  | 1.509708000  |
| H | 4.624941000  | 0.709641000  | 2.749202000  |
| H | 5.585591000  | 1.783264000  | 3.788536000  |
| H | 6.293156000  | 0.298514000  | 3.128762000  |
| H | -2.072342000 | 0.504962000  | -2.957835000 |
| H | 0.128340000  | 2.068289000  | -3.045315000 |
| H | 0.874239000  | 2.586347000  | -0.504857000 |
| H | -0.866057000 | 1.353907000  | 1.141093000  |

|   |              |              |              |
|---|--------------|--------------|--------------|
| H | 0.865964000  | -1.353916000 | 1.141176000  |
| H | -0.874249000 | -2.586411000 | -0.504820000 |
| H | -0.128227000 | -2.068432000 | -3.045258000 |
| H | 2.072448000  | -0.505098000 | -2.957720000 |
| H | -8.671287000 | 0.306621000  | 0.062961000  |
| H | -8.754937000 | 1.806520000  | 1.001472000  |
| H | -8.299733000 | 0.285463000  | 1.786878000  |
| H | -6.348478000 | 4.286311000  | -0.423473000 |
| H | -5.979674000 | 4.277591000  | 1.300909000  |
| H | -7.592232000 | 3.801662000  | 0.740794000  |
| H | 6.348598000  | -4.286252000 | -0.423179000 |
| H | 5.979771000  | -4.277509000 | 1.301198000  |
| H | 7.592320000  | -3.801535000 | 0.741095000  |
| H | 8.754953000  | -1.806348000 | 1.001742000  |
| H | 8.299687000  | -0.285290000 | 1.787110000  |
| H | 8.671261000  | -0.306471000 | 0.063198000  |

Cartesian coordinates and energies ( $E_h$ ) of **5a** [**FcP<sub>2</sub>SnCl**]<sup>+</sup>

E(RB3PW91) = -10818.4274008

Sum of electronic and zero-point Energies= -10817.355685

Sum of electronic and thermal Energies= -10817.285737

Sum of electronic and thermal Enthalpies= -10817.284793

Sum of electronic and thermal Free Energies= -10817.463826

|    |              |              |              |
|----|--------------|--------------|--------------|
| Fe | -0.079972000 | -3.038686000 | 0.116434000  |
| P  | 1.618356000  | -0.258177000 | 0.862838000  |
| P  | -1.679612000 | 0.027498000  | 0.523571000  |
| N  | 3.710544000  | 1.552621000  | 1.150159000  |
| N  | 4.474214000  | -0.272235000 | 0.285123000  |
| N  | -3.639179000 | 1.721772000  | -0.655220000 |
| N  | -4.494342000 | -0.130328000 | 0.044462000  |
| C  | 3.330507000  | 0.330813000  | 0.685692000  |
| C  | 5.092112000  | 1.712329000  | 1.049005000  |
| C  | 5.574829000  | 0.562098000  | 0.503306000  |
| C  | -3.310414000 | 0.512322000  | -0.132293000 |
| C  | -5.022495000 | 1.844560000  | -0.798108000 |
| C  | -5.560793000 | 0.674017000  | -0.360183000 |
| C  | 2.815896000  | 2.560330000  | 1.641112000  |
| C  | 2.446597000  | 3.608752000  | 0.788562000  |
| C  | 1.556216000  | 4.563625000  | 1.288071000  |
| C  | 1.044440000  | 4.489348000  | 2.582369000  |
| C  | 1.463140000  | 3.439131000  | 3.408556000  |
| C  | 2.360764000  | 2.469427000  | 2.967456000  |
| C  | 2.983265000  | 3.745541000  | -0.610755000 |

|   |              |              |              |
|---|--------------|--------------|--------------|
| C | 0.093065000  | 5.531342000  | 3.105089000  |
| C | 2.822319000  | 1.361610000  | 3.871659000  |
| C | 4.592022000  | -1.536393000 | -0.380239000 |
| C | 4.491964000  | -1.557350000 | -1.774232000 |
| C | 4.643610000  | -2.791965000 | -2.408105000 |
| C | 4.877266000  | -3.963836000 | -1.685385000 |
| C | 4.977095000  | -3.887975000 | -0.291985000 |
| C | 4.842426000  | -2.679015000 | 0.386571000  |
| C | 4.172449000  | -0.307199000 | -2.544926000 |
| C | 4.981682000  | -5.293754000 | -2.380611000 |
| C | 4.932575000  | -2.589870000 | 1.883826000  |
| C | -2.735427000 | 2.737023000  | -1.103709000 |
| C | -2.292415000 | 3.709241000  | -0.200313000 |
| C | -1.455569000 | 4.711199000  | -0.697669000 |
| C | -1.056321000 | 4.742691000  | -2.034469000 |
| C | -1.526651000 | 3.748842000  | -2.902021000 |
| C | -2.378688000 | 2.736625000  | -2.462920000 |
| C | -2.646911000 | 3.647372000  | 1.258814000  |
| C | -0.141034000 | 5.821527000  | -2.545642000 |
| C | -2.869736000 | 1.654010000  | -3.382690000 |
| C | -4.694950000 | -1.414650000 | 0.650243000  |
| C | -4.760360000 | -1.483926000 | 2.047876000  |
| C | -4.989005000 | -2.735165000 | 2.619086000  |
| C | -5.156207000 | -3.881522000 | 1.836218000  |
| C | -5.107238000 | -3.756142000 | 0.446468000  |
| C | -4.880129000 | -2.528148000 | -0.175498000 |
| C | -4.577464000 | -0.253299000 | 2.892457000  |
| C | -5.347197000 | -5.228902000 | 2.477438000  |
| C | -4.844230000 | -2.414740000 | -1.674054000 |
| C | 1.652598000  | -2.003879000 | 0.383945000  |
| C | 1.524703000  | -3.054297000 | 1.359431000  |
| C | 1.434692000  | -4.292840000 | 0.668121000  |
| C | 1.496138000  | -4.021170000 | -0.730604000 |
| C | 1.615580000  | -2.618267000 | -0.911351000 |
| C | -1.681561000 | -1.765872000 | 0.202610000  |
| C | -1.759208000 | -2.766805000 | 1.229906000  |
| C | -1.783396000 | -4.042689000 | 0.606077000  |
| C | -1.703591000 | -3.847282000 | -0.805119000 |
| C | -1.628299000 | -2.448992000 | -1.058226000 |
| C | 5.767806000  | 2.951887000  | 1.510328000  |
| C | 6.949061000  | 0.141417000  | 0.127862000  |
| C | -5.641449000 | 3.088436000  | -1.324101000 |
| C | -6.969244000 | 0.217360000  | -0.240325000 |
| H | 1.254595000  | 5.379807000  | 0.637222000  |
| H | 1.088902000  | 3.381835000  | 4.428040000  |

|   |              |              |              |
|---|--------------|--------------|--------------|
| H | 3.386947000  | 2.806955000  | -0.997858000 |
| H | 3.783040000  | 4.495205000  | -0.647365000 |
| H | 2.191388000  | 4.073112000  | -1.289548000 |
| H | -0.294899000 | 6.164664000  | 2.302717000  |
| H | 0.591266000  | 6.185764000  | 3.829416000  |
| H | -0.757057000 | 5.070504000  | 3.617665000  |
| H | 3.903791000  | 1.206634000  | 3.797252000  |
| H | 2.337532000  | 0.418325000  | 3.593827000  |
| H | 2.578828000  | 1.579744000  | 4.913754000  |
| H | 4.561626000  | -2.838869000 | -3.491178000 |
| H | 5.156627000  | -4.795075000 | 0.279795000  |
| H | 4.322659000  | -0.454904000 | -3.616278000 |
| H | 4.788828000  | 0.540427000  | -2.226169000 |
| H | 3.122918000  | -0.023353000 | -2.400027000 |
| H | 5.179773000  | -5.178680000 | -3.449346000 |
| H | 4.044814000  | -5.853697000 | -2.274932000 |
| H | 5.777028000  | -5.909889000 | -1.950371000 |
| H | 5.753933000  | -1.938237000 | 2.202929000  |
| H | 5.090959000  | -3.574739000 | 2.327765000  |
| H | 4.010236000  | -2.173982000 | 2.302792000  |
| H | -1.100002000 | 5.477534000  | -0.014795000 |
| H | -1.210870000 | 3.753428000  | -3.941977000 |
| H | -2.581489000 | 4.635818000  | 1.718938000  |
| H | -1.949163000 | 2.986843000  | 1.788313000  |
| H | -3.654619000 | 3.255081000  | 1.422933000  |
| H | 0.666777000  | 5.397162000  | -3.150260000 |
| H | 0.308026000  | 6.392340000  | -1.728360000 |
| H | -0.684928000 | 6.527573000  | -3.183382000 |
| H | -2.451188000 | 1.771675000  | -4.383267000 |
| H | -3.962637000 | 1.654353000  | -3.461083000 |
| H | -2.564430000 | 0.668116000  | -3.016811000 |
| H | -5.039759000 | -2.816647000 | 3.702345000  |
| H | -5.236623000 | -4.639785000 | -0.173567000 |
| H | -5.213168000 | 0.570286000  | 2.548121000  |
| H | -3.540107000 | 0.099535000  | 2.843384000  |
| H | -4.821308000 | -0.455189000 | 3.937763000  |
| H | -4.379271000 | -5.724284000 | 2.621124000  |
| H | -5.961225000 | -5.887378000 | 1.856700000  |
| H | -5.820773000 | -5.145968000 | 3.459558000  |
| H | -4.505122000 | -3.351089000 | -2.122115000 |
| H | -4.168988000 | -1.622252000 | -2.004590000 |
| H | -5.839143000 | -2.195458000 | -2.080207000 |
| H | 1.477737000  | -2.910084000 | 2.430943000  |
| H | 1.299190000  | -5.265709000 | 1.121822000  |
| H | 1.416955000  | -4.753187000 | -1.523211000 |

|    |              |              |              |
|----|--------------|--------------|--------------|
| H  | 1.643682000  | -2.095528000 | -1.854850000 |
| H  | -1.803448000 | -2.568382000 | 2.291653000  |
| H  | -1.817734000 | -4.997033000 | 1.114228000  |
| H  | -1.658354000 | -4.628638000 | -1.552460000 |
| H  | -1.510188000 | -1.972277000 | -2.021236000 |
| H  | 5.487806000  | 3.814889000  | 0.898167000  |
| H  | 6.851319000  | 2.834580000  | 1.457480000  |
| H  | 5.496850000  | 3.183314000  | 2.545323000  |
| H  | 7.020756000  | -0.052082000 | -0.947544000 |
| H  | 7.239575000  | -0.780412000 | 0.641446000  |
| H  | 7.667999000  | 0.920769000  | 0.385516000  |
| H  | -5.310988000 | 3.302668000  | -2.345535000 |
| H  | -5.370057000 | 3.952060000  | -0.708172000 |
| H  | -6.728700000 | 2.997249000  | -1.329130000 |
| H  | -7.167629000 | -0.645715000 | -0.882957000 |
| H  | -7.652193000 | 1.018971000  | -0.525949000 |
| H  | -7.197901000 | -0.083165000 | 0.787046000  |
| Cl | 0.258535000  | -0.091069000 | -2.921815000 |
| Sn | 0.252138000  | 1.276885000  | -0.832228000 |

Cartesian coordinates and energies ( $E_h$ ) of **5a** [**FcP<sub>2</sub>SnCl**]<sup>+</sup>, scrf=(cpcm,solvent=thf)

E(RB3PW91) = -10818.4724827

Sum of electronic and zero-point Energies= -10817.401714

Sum of electronic and thermal Energies= -10817.331720

Sum of electronic and thermal Enthalpies= -10817.330776

Sum of electronic and thermal Free Energies= -10817.509527

|    |              |              |              |
|----|--------------|--------------|--------------|
| Fe | -0.027474000 | -3.038391000 | 0.102921000  |
| P  | 1.617432000  | -0.226615000 | 0.821973000  |
| P  | -1.666357000 | 0.008114000  | 0.479923000  |
| N  | 3.675132000  | 1.608649000  | 1.172130000  |
| N  | 4.481710000  | -0.182218000 | 0.279254000  |
| N  | -3.665296000 | 1.672698000  | -0.673717000 |
| N  | -4.488973000 | -0.179184000 | 0.059787000  |
| C  | 3.324966000  | 0.390785000  | 0.681688000  |
| C  | 5.052532000  | 1.800189000  | 1.084099000  |
| C  | 5.563299000  | 0.669788000  | 0.520648000  |
| C  | -3.316844000 | 0.472306000  | -0.147631000 |
| C  | -5.051827000 | 1.782800000  | -0.789571000 |
| C  | -5.570680000 | 0.611033000  | -0.330340000 |
| C  | 2.751380000  | 2.573656000  | 1.693948000  |
| C  | 2.335997000  | 3.629131000  | 0.872707000  |
| C  | 1.411358000  | 4.534054000  | 1.405264000  |



|   |              |              |              |
|---|--------------|--------------|--------------|
| C | 0.914737000  | 4.404436000  | 2.701789000  |
| C | 1.384542000  | 3.351229000  | 3.498219000  |
| C | 2.316003000  | 2.430849000  | 3.022783000  |
| C | 2.869929000  | 3.830399000  | -0.519495000 |
| C | -0.076615000 | 5.390041000  | 3.258336000  |
| C | 2.844692000  | 1.324980000  | 3.892506000  |
| C | 4.626701000  | -1.441638000 | -0.388634000 |
| C | 4.529364000  | -1.461806000 | -1.783078000 |
| C | 4.700860000  | -2.692056000 | -2.419951000 |
| C | 4.951602000  | -3.861964000 | -1.698028000 |
| C | 5.051126000  | -3.787063000 | -0.304771000 |
| C | 4.894997000  | -2.581005000 | 0.376592000  |
| C | 4.196817000  | -0.211906000 | -2.548363000 |
| C | 5.067677000  | -5.188630000 | -2.398149000 |
| C | 4.982685000  | -2.493872000 | 1.874030000  |
| C | -2.778758000 | 2.699352000  | -1.130136000 |
| C | -2.336976000 | 3.674050000  | -0.228907000 |
| C | -1.521782000 | 4.691222000  | -0.734474000 |
| C | -1.145239000 | 4.735691000  | -2.077724000 |
| C | -1.616420000 | 3.739660000  | -2.943703000 |
| C | -2.444726000 | 2.711918000  | -2.495258000 |
| C | -2.675959000 | 3.607945000  | 1.233639000  |
| C | -0.252669000 | 5.829319000  | -2.597836000 |
| C | -2.939330000 | 1.629002000  | -3.413012000 |
| C | -4.661805000 | -1.461912000 | 0.676848000  |
| C | -4.703443000 | -1.522464000 | 2.075465000  |
| C | -4.897217000 | -2.774783000 | 2.658811000  |
| C | -5.053480000 | -3.928869000 | 1.884971000  |
| C | -5.033599000 | -3.811799000 | 0.493113000  |
| C | -4.840651000 | -2.583455000 | -0.139877000 |
| C | -4.533342000 | -0.281983000 | 2.908042000  |
| C | -5.198998000 | -5.277341000 | 2.536371000  |
| C | -4.831558000 | -2.474629000 | -1.638934000 |
| C | 1.688626000  | -1.976773000 | 0.366370000  |
| C | 1.574303000  | -3.020043000 | 1.350849000  |
| C | 1.504124000  | -4.265935000 | 0.670003000  |
| C | 1.566094000  | -4.006529000 | -0.731257000 |
| C | 1.666810000  | -2.603435000 | -0.922986000 |
| C | -1.646935000 | -1.788008000 | 0.180032000  |
| C | -1.707446000 | -2.778725000 | 1.218344000  |
| C | -1.716395000 | -4.061452000 | 0.608473000  |
| C | -1.645315000 | -3.880564000 | -0.804940000 |
| C | -1.590771000 | -2.484385000 | -1.072838000 |
| C | 5.699038000  | 3.044522000  | 1.571822000  |
| C | 6.949256000  | 0.285829000  | 0.150819000  |

|   |              |              |              |
|---|--------------|--------------|--------------|
| C | -5.694174000 | 3.017542000  | -1.307494000 |
| C | -6.972220000 | 0.145772000  | -0.174611000 |
| H | 1.076556000  | 5.358436000  | 0.781965000  |
| H | 1.024508000  | 3.254509000  | 4.519786000  |
| H | 3.269573000  | 2.909563000  | -0.950947000 |
| H | 3.675038000  | 4.574775000  | -0.517500000 |
| H | 2.081861000  | 4.200291000  | -1.180347000 |
| H | -0.458393000 | 6.060129000  | 2.483892000  |
| H | 0.385397000  | 6.007830000  | 4.036728000  |
| H | -0.927577000 | 4.876674000  | 3.716790000  |
| H | 3.938559000  | 1.281994000  | 3.860726000  |
| H | 2.472335000  | 0.352693000  | 3.549222000  |
| H | 2.536457000  | 1.463637000  | 4.930913000  |
| H | 4.620832000  | -2.738539000 | -3.503305000 |
| H | 5.245651000  | -4.691893000 | 0.265813000  |
| H | 4.300418000  | -0.369995000 | -3.623818000 |
| H | 4.837783000  | 0.627988000  | -2.260193000 |
| H | 3.160456000  | 0.090726000  | -2.355648000 |
| H | 5.355006000  | -5.068798000 | -3.446248000 |
| H | 4.104882000  | -5.713370000 | -2.377417000 |
| H | 5.801428000  | -5.837327000 | -1.910674000 |
| H | 5.796526000  | -1.833606000 | 2.193662000  |
| H | 5.151152000  | -3.478459000 | 2.314957000  |
| H | 4.056362000  | -2.087569000 | 2.293468000  |
| H | -1.172445000 | 5.463369000  | -0.055236000 |
| H | -1.325376000 | 3.760833000  | -3.990871000 |
| H | -2.648108000 | 4.601858000  | 1.685048000  |
| H | -1.944538000 | 2.984335000  | 1.762284000  |
| H | -3.663706000 | 3.173691000  | 1.410251000  |
| H | 0.587645000  | 5.411843000  | -3.161984000 |
| H | 0.150664000  | 6.440891000  | -1.786804000 |
| H | -0.800741000 | 6.490610000  | -3.278363000 |
| H | -2.561088000 | 1.774869000  | -4.426296000 |
| H | -4.033393000 | 1.601454000  | -3.454379000 |
| H | -2.601534000 | 0.645699000  | -3.068588000 |
| H | -4.925601000 | -2.850326000 | 3.743298000  |
| H | -5.155730000 | -4.701932000 | -0.119070000 |
| H | -5.196129000 | 0.523024000  | 2.572029000  |
| H | -3.507085000 | 0.097284000  | 2.833383000  |
| H | -4.747095000 | -0.484249000 | 3.959739000  |
| H | -4.217605000 | -5.755175000 | 2.643618000  |
| H | -5.823463000 | -5.947456000 | 1.938558000  |
| H | -5.635808000 | -5.198043000 | 3.535768000  |
| H | -4.542329000 | -3.425484000 | -2.091406000 |
| H | -4.132016000 | -1.709621000 | -1.983829000 |

|    |              |              |              |
|----|--------------|--------------|--------------|
| H  | -5.824049000 | -2.211145000 | -2.023468000 |
| H  | 1.526710000  | -2.868299000 | 2.421398000  |
| H  | 1.381122000  | -5.236649000 | 1.132077000  |
| H  | 1.502593000  | -4.748102000 | -1.516537000 |
| H  | 1.700714000  | -2.086755000 | -1.869477000 |
| H  | -1.754538000 | -2.570678000 | 2.278277000  |
| H  | -1.737747000 | -5.010451000 | 1.127384000  |
| H  | -1.596712000 | -4.669651000 | -1.543905000 |
| H  | -1.494912000 | -2.014370000 | -2.041274000 |
| H  | 5.399592000  | 3.911961000  | 0.975784000  |
| H  | 6.784407000  | 2.951600000  | 1.516437000  |
| H  | 5.423130000  | 3.246172000  | 2.611567000  |
| H  | 7.033843000  | 0.110781000  | -0.926681000 |
| H  | 7.257375000  | -0.634171000 | 0.657179000  |
| H  | 7.645556000  | 1.079405000  | 0.425243000  |
| H  | -5.383450000 | 3.233212000  | -2.334584000 |
| H  | -5.425156000 | 3.883798000  | -0.694517000 |
| H  | -6.779506000 | 2.910001000  | -1.294582000 |
| H  | -7.173714000 | -0.734728000 | -0.791813000 |
| H  | -7.664719000 | 0.935104000  | -0.469824000 |
| H  | -7.180229000 | -0.126243000 | 0.864975000  |
| Cl | 0.266694000  | -0.137388000 | -3.021750000 |
| Sn | 0.237214000  | 1.257137000  | -0.900739000 |

Cartesian coordinates and energies ( $E_h$ ) of **5a** [**FcP<sub>2</sub>SnCl**]<sup>+</sup>, scrf=(cpcm,solvent=acetonitrile)

E(RB3PW91) = -10818.4785180

Sum of electronic and zero-point Energies= -10817.407839

Sum of electronic and thermal Energies= -10817.337855

Sum of electronic and thermal Enthalpies= -10817.336911

Sum of electronic and thermal Free Energies= -10817.515595

|    |              |              |              |
|----|--------------|--------------|--------------|
| Fe | -0.020667000 | -3.038413000 | 0.102152000  |
| P  | 1.617322000  | -0.222083000 | 0.815866000  |
| P  | -1.665052000 | 0.005310000  | 0.472881000  |
| N  | 3.670588000  | 1.615791000  | 1.174889000  |
| N  | 4.482829000  | -0.170800000 | 0.279180000  |
| N  | -3.669073000 | 1.665833000  | -0.677316000 |
| N  | -4.488576000 | -0.185968000 | 0.060550000  |
| C  | 3.324383000  | 0.398632000  | 0.681066000  |
| C  | 5.047444000  | 1.811055000  | 1.089696000  |
| C  | 5.561974000  | 0.683109000  | 0.524346000  |
| C  | -3.318123000 | 0.466672000  | -0.150885000 |
| C  | -5.055935000 | 1.774302000  | -0.789737000 |
| C  | -5.572207000 | 0.602313000  | -0.327808000 |

|   |              |              |              |
|---|--------------|--------------|--------------|
| C | 2.743027000  | 2.575656000  | 1.699386000  |
| C | 2.322191000  | 3.631103000  | 0.881044000  |
| C | 1.393985000  | 4.530643000  | 1.416934000  |
| C | 0.899717000  | 4.395831000  | 2.713905000  |
| C | 1.375444000  | 3.342905000  | 3.507560000  |
| C | 2.310477000  | 2.427925000  | 3.028674000  |
| C | 2.855759000  | 3.838942000  | -0.510284000 |
| C | -0.095859000 | 5.375230000  | 3.273799000  |
| C | 2.848134000  | 1.323837000  | 3.895274000  |
| C | 4.631148000  | -1.429328000 | -0.389457000 |
| C | 4.534423000  | -1.448792000 | -1.783960000 |
| C | 4.708378000  | -2.678253000 | -2.421750000 |
| C | 4.960957000  | -3.848217000 | -1.700395000 |
| C | 5.060130000  | -3.774033000 | -0.307065000 |
| C | 4.901439000  | -2.568662000 | 0.375158000  |
| C | 4.200423000  | -0.198613000 | -2.548182000 |
| C | 5.079097000  | -5.174284000 | -2.401407000 |
| C | 4.988817000  | -2.482424000 | 1.872640000  |
| C | -2.784559000 | 2.694617000  | -1.132710000 |
| C | -2.342946000 | 3.667779000  | -0.229684000 |
| C | -1.530150000 | 4.687660000  | -0.734028000 |
| C | -1.156616000 | 4.736709000  | -2.078007000 |
| C | -1.627961000 | 3.742233000  | -2.945885000 |
| C | -2.453256000 | 2.711595000  | -2.498446000 |
| C | -2.680935000 | 3.598929000  | 1.232965000  |
| C | -0.268073000 | 5.834239000  | -2.596867000 |
| C | -2.948506000 | 1.630623000  | -3.418213000 |
| C | -4.657628000 | -1.468007000 | 0.680021000  |
| C | -4.696222000 | -1.526062000 | 2.078829000  |
| C | -4.885049000 | -2.777969000 | 2.664870000  |
| C | -5.039534000 | -3.933818000 | 1.893256000  |
| C | -5.023558000 | -3.819170000 | 0.501079000  |
| C | -4.835426000 | -2.591357000 | -0.134470000 |
| C | -4.528619000 | -0.283406000 | 2.908657000  |
| C | -5.178673000 | -5.281761000 | 2.547223000  |
| C | -4.830149000 | -2.484739000 | -1.633670000 |
| C | 1.693109000  | -1.973112000 | 0.364977000  |
| C | 1.580377000  | -3.014869000 | 1.351166000  |
| C | 1.513025000  | -4.262067000 | 0.672395000  |
| C | 1.575464000  | -4.005112000 | -0.729325000 |
| C | 1.673761000  | -2.602109000 | -0.923196000 |
| C | -1.642652000 | -1.791295000 | 0.177278000  |
| C | -1.700578000 | -2.779703000 | 1.217939000  |
| C | -1.707369000 | -4.063861000 | 0.611165000  |
| C | -1.637838000 | -3.886242000 | -0.802693000 |

|   |              |              |              |
|---|--------------|--------------|--------------|
| C | -1.586402000 | -2.490612000 | -1.073850000 |
| C | 5.689980000  | 3.055763000  | 1.581390000  |
| C | 6.949563000  | 0.303706000  | 0.156259000  |
| C | -5.701393000 | 3.008087000  | -1.305809000 |
| C | -6.972755000 | 0.135858000  | -0.167747000 |
| H | 1.055742000  | 5.355725000  | 0.796515000  |
| H | 1.017684000  | 3.242781000  | 4.529597000  |
| H | 3.254299000  | 2.919895000  | -0.946596000 |
| H | 3.662205000  | 4.581760000  | -0.503991000 |
| H | 2.068463000  | 4.214574000  | -1.168807000 |
| H | -0.471682000 | 6.053812000  | 2.503917000  |
| H | 0.360131000  | 5.983583000  | 4.063055000  |
| H | -0.950250000 | 4.856464000  | 3.719675000  |
| H | 3.942839000  | 1.298909000  | 3.873207000  |
| H | 2.495457000  | 0.347768000  | 3.542210000  |
| H | 2.528283000  | 1.450239000  | 4.931714000  |
| H | 4.629123000  | -2.724165000 | -3.505218000 |
| H | 5.256324000  | -4.678830000 | 0.263016000  |
| H | 4.301441000  | -0.356762000 | -3.623921000 |
| H | 4.842216000  | 0.641044000  | -2.261430000 |
| H | 3.164940000  | 0.104698000  | -2.351689000 |
| H | 5.369153000  | -5.053315000 | -3.448662000 |
| H | 4.116217000  | -5.699000000 | -2.383755000 |
| H | 5.811406000  | -5.823378000 | -1.912286000 |
| H | 5.802449000  | -1.822136000 | 2.192570000  |
| H | 5.157410000  | -3.467320000 | 2.312818000  |
| H | 4.062545000  | -2.076319000 | 2.292301000  |
| H | -1.181833000 | 5.459127000  | -0.053575000 |
| H | -1.340473000 | 3.767990000  | -3.993989000 |
| H | -2.660463000 | 4.593069000  | 1.684169000  |
| H | -1.944377000 | 2.981338000  | 1.761502000  |
| H | -3.665156000 | 3.157139000  | 1.410066000  |
| H | 0.570760000  | 5.420902000  | -3.166228000 |
| H | 0.137251000  | 6.442742000  | -1.784608000 |
| H | -0.820392000 | 6.497215000  | -3.272331000 |
| H | -2.572805000 | 1.780278000  | -4.431980000 |
| H | -4.042541000 | 1.602084000  | -3.457689000 |
| H | -2.610078000 | 0.646534000  | -3.076570000 |
| H | -4.910536000 | -2.851688000 | 3.749551000  |
| H | -5.144566000 | -4.710723000 | -0.109266000 |
| H | -5.195746000 | 0.518214000  | 2.573324000  |
| H | -3.504360000 | 0.100338000  | 2.829973000  |
| H | -4.737839000 | -0.484903000 | 3.961391000  |
| H | -4.195371000 | -5.756373000 | 2.651244000  |
| H | -5.803252000 | -5.954585000 | 1.952532000  |

|    |              |              |              |
|----|--------------|--------------|--------------|
| H  | -5.611717000 | -5.202091000 | 3.548244000  |
| H  | -4.543989000 | -3.436861000 | -2.085454000 |
| H  | -4.130419000 | -1.721159000 | -1.981391000 |
| H  | -5.823146000 | -2.219620000 | -2.015641000 |
| H  | 1.532596000  | -2.861624000 | 2.421504000  |
| H  | 1.391542000  | -5.232195000 | 1.136115000  |
| H  | 1.514490000  | -4.748496000 | -1.513126000 |
| H  | 1.709257000  | -2.086446000 | -1.870160000 |
| H  | -1.747895000 | -2.569481000 | 2.277456000  |
| H  | -1.726675000 | -5.011635000 | 1.132384000  |
| H  | -1.588990000 | -4.677084000 | -1.539765000 |
| H  | -1.494244000 | -2.022353000 | -2.043446000 |
| H  | 5.390013000  | 3.923512000  | 0.986123000  |
| H  | 6.775580000  | 2.965144000  | 1.528236000  |
| H  | 5.411201000  | 3.254320000  | 2.620928000  |
| H  | 7.036676000  | 0.131746000  | -0.921522000 |
| H  | 7.259289000  | -0.616316000 | 0.661541000  |
| H  | 7.642814000  | 1.098759000  | 0.433868000  |
| H  | -5.392761000 | 3.225084000  | -2.333202000 |
| H  | -5.433441000 | 3.874090000  | -0.692062000 |
| H  | -6.786381000 | 2.897966000  | -1.291312000 |
| H  | -7.174463000 | -0.746478000 | -0.782206000 |
| H  | -7.666461000 | 0.923727000  | -0.463793000 |
| H  | -7.178129000 | -0.132876000 | 0.873195000  |
| Cl | 0.266985000  | -0.147605000 | -3.039721000 |
| Sn | 0.234858000  | 1.252576000  | -0.911636000 |

Cartesian coordinates and energies ( $E_h$ ) of **5a** [**FcP<sub>2</sub>SnCl**]<sup>+</sup>[**SnCl<sub>3</sub>**]<sup>-</sup>, scrf=(cpcm,solvent=THF)

E(RB3PW91) = -18220.3853502

Sum of electronic and zero-point Energies= -18219.311281

Sum of electronic and thermal Energies= -18219.232743

Sum of electronic and thermal Enthalpies= -18219.231798

Sum of electronic and thermal Free Energies= -18219.434503

|    |              |              |              |
|----|--------------|--------------|--------------|
| Fe | -1.925862000 | 3.044776000  | -0.252544000 |
| P  | 0.307367000  | 0.569511000  | -0.113829000 |
| P  | -2.841955000 | -0.292889000 | -0.625189000 |
| Cl | -2.081583000 | 0.540387000  | 3.210229000  |
| Sn | -1.231670000 | -1.001017000 | 1.373876000  |
| Sn | 8.211371000  | -0.246467000 | -1.847242000 |
| Cl | 8.499839000  | -0.617401000 | 0.627781000  |
| Cl | 5.984435000  | 0.865673000  | -1.582588000 |
| Cl | 7.190772000  | -2.507679000 | -2.256645000 |
| N  | 2.661902000  | -0.833123000 | 0.333413000  |

|   |              |              |              |
|---|--------------|--------------|--------------|
| N | 2.863648000  | 1.144091000  | 1.169426000  |
| N | -4.778058000 | -2.220907000 | 0.168899000  |
| N | -5.653282000 | -0.644999000 | -1.012962000 |
| C | 1.985149000  | 0.323624000  | 0.550878000  |
| C | 3.966342000  | -0.742386000 | 0.811104000  |
| C | 4.096892000  | 0.507642000  | 1.336725000  |
| C | -4.499619000 | -1.024809000 | -0.406854000 |
| C | -6.098127000 | -2.599422000 | -0.080656000 |
| C | -6.651369000 | -1.601472000 | -0.822683000 |
| C | 2.104399000  | -1.996274000 | -0.291647000 |
| C | 1.644018000  | -3.045038000 | 0.513422000  |
| C | 1.072420000  | -4.148258000 | -0.130075000 |
| C | 0.965309000  | -4.217499000 | -1.518641000 |
| C | 1.476463000  | -3.161373000 | -2.285010000 |
| C | 2.066436000  | -2.045122000 | -1.695771000 |
| C | 1.786133000  | -3.036191000 | 2.011337000  |
| C | 0.350553000  | -5.413705000 | -2.193817000 |
| C | 2.655330000  | -0.934700000 | -2.518365000 |
| C | 2.588899000  | 2.449958000  | 1.690056000  |
| C | 2.096497000  | 2.545886000  | 2.995191000  |
| C | 1.857068000  | 3.825120000  | 3.499826000  |
| C | 2.090056000  | 4.969561000  | 2.732564000  |
| C | 2.591839000  | 4.821360000  | 1.435699000  |
| C | 2.853743000  | 3.565496000  | 0.889247000  |
| C | 1.789665000  | 1.308913000  | 3.791639000  |
| C | 1.764269000  | 6.336722000  | 3.270441000  |
| C | 3.378026000  | 3.398430000  | -0.507842000 |
| C | -3.904211000 | -3.004593000 | 0.988045000  |
| C | -3.061212000 | -3.945409000 | 0.387089000  |
| C | -2.273043000 | -4.731897000 | 1.232997000  |
| C | -2.305920000 | -4.583489000 | 2.620249000  |
| C | -3.170641000 | -3.631171000 | 3.176652000  |
| C | -3.989160000 | -2.832323000 | 2.380235000  |
| C | -2.961444000 | -4.074960000 | -1.106726000 |
| C | -1.429093000 | -5.419069000 | 3.512571000  |
| C | -4.905522000 | -1.795264000 | 2.966880000  |
| C | -5.852866000 | 0.516890000  | -1.828850000 |
| C | -5.493526000 | 0.445302000  | -3.180676000 |
| C | -5.717335000 | 1.576541000  | -3.965749000 |
| C | -6.285352000 | 2.738374000  | -3.434269000 |
| C | -6.653824000 | 2.749963000  | -2.086928000 |
| C | -6.449503000 | 1.646235000  | -1.258299000 |
| C | -4.879668000 | -0.802744000 | -3.751929000 |
| C | -6.459012000 | 3.967693000  | -4.284329000 |
| C | -6.860295000 | 1.673242000  | 0.187244000  |

|   |              |              |              |
|---|--------------|--------------|--------------|
| C | -0.053480000 | 2.330427000  | 0.102664000  |
| C | -0.051398000 | 3.245934000  | -1.006940000 |
| C | -0.525434000 | 4.503777000  | -0.544660000 |
| C | -0.830349000 | 4.376795000  | 0.842978000  |
| C | -0.553043000 | 3.042842000  | 1.241737000  |
| C | -3.215062000 | 1.489608000  | -0.589430000 |
| C | -3.133664000 | 2.353087000  | -1.734475000 |
| C | -3.538460000 | 3.655901000  | -1.338702000 |
| C | -3.857293000 | 3.617518000  | 0.051478000  |
| C | -3.648452000 | 2.290158000  | 0.519376000  |
| C | 4.932182000  | -1.853574000 | 0.648537000  |
| C | 5.250760000  | 1.193399000  | 1.967615000  |
| C | -6.643311000 | -3.889809000 | 0.412356000  |
| C | -8.004207000 | -1.444534000 | -1.414651000 |
| H | 0.707351000  | -4.970690000 | 0.478696000  |
| H | 1.426123000  | -3.217342000 | -3.369916000 |
| H | 1.883273000  | -2.026096000 | 2.416337000  |
| H | 2.676626000  | -3.600618000 | 2.312646000  |
| H | 0.920194000  | -3.509457000 | 2.481068000  |
| H | -0.117348000 | -6.088427000 | -1.472342000 |
| H | 1.109495000  | -5.983465000 | -2.741885000 |
| H | -0.410203000 | -5.108806000 | -2.919443000 |
| H | 3.683975000  | -0.715486000 | -2.212905000 |
| H | 2.078816000  | -0.010725000 | -2.392022000 |
| H | 2.658053000  | -1.194626000 | -3.579196000 |
| H | 1.466054000  | 3.927523000  | 4.509327000  |
| H | 2.774884000  | 5.705682000  | 0.830110000  |
| H | 1.556609000  | 1.556317000  | 4.829460000  |
| H | 2.624920000  | 0.600830000  | 3.783776000  |
| H | 0.920521000  | 0.788918000  | 3.370755000  |
| H | 1.765141000  | 6.351693000  | 4.363829000  |
| H | 0.767028000  | 6.648518000  | 2.936898000  |
| H | 2.475157000  | 7.088327000  | 2.914439000  |
| H | 4.367035000  | 2.928448000  | -0.515907000 |
| H | 3.451373000  | 4.361898000  | -1.016736000 |
| H | 2.718914000  | 2.751845000  | -1.096271000 |
| H | -1.615465000 | -5.474337000 | 0.789993000  |
| H | -3.201483000 | -3.504266000 | 4.255894000  |
| H | -2.638424000 | -5.078853000 | -1.390053000 |
| H | -2.219807000 | -3.367399000 | -1.497361000 |
| H | -3.911087000 | -3.861733000 | -1.604978000 |
| H | -0.791341000 | -4.782117000 | 4.134804000  |
| H | -0.782986000 | -6.084985000 | 2.935279000  |
| H | -2.030734000 | -6.032898000 | 4.191794000  |
| H | -4.821304000 | -1.772122000 | 4.054804000  |



|   |              |              |              |
|---|--------------|--------------|--------------|
| H | -5.952257000 | -1.985146000 | 2.706212000  |
| H | -4.651089000 | -0.798472000 | 2.591142000  |
| H | -5.439193000 | 1.549802000  | -5.016718000 |
| H | -7.097794000 | 3.647253000  | -1.662772000 |
| H | -5.467607000 | -1.692493000 | -3.500872000 |
| H | -3.873156000 | -0.960000000 | -3.345946000 |
| H | -4.803323000 | -0.738853000 | -4.839505000 |
| H | -5.589649000 | 4.628042000  | -4.179035000 |
| H | -7.341198000 | 4.541595000  | -3.986100000 |
| H | -6.552946000 | 3.715782000  | -5.344323000 |
| H | -6.873296000 | 2.698229000  | 0.563753000  |
| H | -6.177172000 | 1.092903000  | 0.811700000  |
| H | -7.865325000 | 1.255885000  | 0.321577000  |
| H | 0.242111000  | 3.001436000  | -2.019512000 |
| H | -0.670228000 | 5.389569000  | -1.149146000 |
| H | -1.243157000 | 5.152169000  | 1.474711000  |
| H | -0.706307000 | 2.621824000  | 2.223210000  |
| H | -2.829841000 | 2.047959000  | -2.726238000 |
| H | -3.566151000 | 4.531696000  | -1.973203000 |
| H | -4.162720000 | 4.461495000  | 0.656119000  |
| H | -3.764271000 | 1.936055000  | 1.533903000  |
| H | 4.601382000  | -2.755931000 | 1.171860000  |
| H | 5.909210000  | -1.561201000 | 1.033071000  |
| H | 5.061313000  | -2.100814000 | -0.409322000 |
| H | 5.032997000  | 1.470633000  | 3.004474000  |
| H | 5.506230000  | 2.106339000  | 1.421387000  |
| H | 6.124636000  | 0.540823000  | 1.948829000  |
| H | -6.616838000 | -3.947338000 | 1.505042000  |
| H | -6.060442000 | -4.731988000 | 0.025635000  |
| H | -7.678099000 | -4.009099000 | 0.088852000  |
| H | -8.523612000 | -0.573720000 | -1.003642000 |
| H | -8.608308000 | -2.329657000 | -1.211006000 |
| H | -7.942727000 | -1.309563000 | -2.499110000 |

Cartesian coordinates and energies ( $E_h$ ) of **5a**  $[\text{FcP}_2\text{SnCl}]^+[\text{SnCl}_3]^-$ ,  
 scrf=(cpcm,solvent=acetonitrile)

$E(\text{RB3PW91}) = -18220.3917008$

|                                              |               |
|----------------------------------------------|---------------|
| Sum of electronic and zero-point Energies=   | -18219.317797 |
| Sum of electronic and thermal Energies=      | -18219.239213 |
| Sum of electronic and thermal Enthalpies=    | -18219.238269 |
| Sum of electronic and thermal Free Energies= | -18219.441054 |

133

symmetry c1

|    |              |              |              |
|----|--------------|--------------|--------------|
| Fe | -1.935032000 | 3.044359000  | -0.252698000 |
| P  | 0.298556000  | 0.570054000  | -0.118105000 |
| P  | -2.853617000 | -0.292707000 | -0.625705000 |
| Cl | -2.080388000 | 0.542324000  | 3.217147000  |
| Sn | -1.242904000 | -1.001771000 | 1.368937000  |
| Sn | 8.259395000  | -0.238861000 | -1.825475000 |
| Cl | 8.517823000  | -0.620981000 | 0.655084000  |
| Cl | 6.017455000  | 0.845737000  | -1.582769000 |
| Cl | 7.263427000  | -2.515882000 | -2.241240000 |
| N  | 2.654362000  | -0.832962000 | 0.324125000  |
| N  | 2.855624000  | 1.142670000  | 1.164432000  |
| N  | -4.788428000 | -2.220502000 | 0.174933000  |
| N  | -5.664328000 | -0.648467000 | -1.011156000 |
| C  | 1.977233000  | 0.323280000  | 0.544135000  |
| C  | 3.958883000  | -0.742441000 | 0.801696000  |
| C  | 4.088818000  | 0.506097000  | 1.330637000  |
| C  | -4.511037000 | -1.026363000 | -0.404417000 |
| C  | -6.108548000 | -2.599940000 | -0.072461000 |
| C  | -6.662310000 | -1.604061000 | -0.817370000 |
| C  | 2.097614000  | -1.994082000 | -0.305621000 |
| C  | 1.635367000  | -3.045841000 | 0.494461000  |
| C  | 1.064139000  | -4.146205000 | -0.154796000 |
| C  | 0.959672000  | -4.210018000 | -1.543928000 |
| C  | 1.473274000  | -3.151002000 | -2.305297000 |
| C  | 2.061918000  | -2.037339000 | -1.710101000 |
| C  | 1.776049000  | -3.043531000 | 1.992522000  |
| C  | 0.341624000  | -5.400779000 | -2.225485000 |
| C  | 2.651467000  | -0.922619000 | -2.526939000 |
| C  | 2.583521000  | 2.449888000  | 1.683130000  |
| C  | 2.092889000  | 2.549503000  | 2.988594000  |
| C  | 1.856712000  | 3.830435000  | 3.490496000  |
| C  | 2.091147000  | 4.972793000  | 2.720272000  |
| C  | 2.592185000  | 4.820778000  | 1.423405000  |
| C  | 2.850819000  | 3.562989000  | 0.879854000  |
| C  | 1.785351000  | 1.314474000  | 3.787766000  |
| C  | 1.767697000  | 6.341564000  | 3.255267000  |
| C  | 3.372949000  | 3.390724000  | -0.517633000 |
| C  | -3.912879000 | -3.002209000 | 0.994050000  |
| C  | -3.072031000 | -3.945135000 | 0.393128000  |
| C  | -2.282287000 | -4.730298000 | 1.238934000  |
| C  | -2.312655000 | -4.579502000 | 2.626134000  |
| C  | -3.175665000 | -3.625497000 | 3.182521000  |
| C  | -3.995243000 | -2.827435000 | 2.386121000  |
| C  | -2.978711000 | -4.079819000 | -1.100676000 |
| C  | -1.436500000 | -5.416081000 | 3.518214000  |

|   |              |              |              |
|---|--------------|--------------|--------------|
| C | -4.912173000 | -1.790782000 | 2.972617000  |
| C | -5.863902000 | 0.512818000  | -1.828136000 |
| C | -5.505638000 | 0.439284000  | -3.180117000 |
| C | -5.727603000 | 1.570495000  | -3.965916000 |
| C | -6.293357000 | 2.733715000  | -3.434871000 |
| C | -6.661611000 | 2.746835000  | -2.087384000 |
| C | -6.458750000 | 1.643387000  | -1.257956000 |
| C | -4.896829000 | -0.811310000 | -3.751324000 |
| C | -6.465565000 | 3.962768000  | -4.285635000 |
| C | -6.869807000 | 1.672042000  | 0.187453000  |
| C | -0.061536000 | 2.330984000  | 0.096723000  |
| C | -0.063462000 | 3.245846000  | -1.013680000 |
| C | -0.536193000 | 4.503931000  | -0.550539000 |
| C | -0.836302000 | 4.377952000  | 0.838236000  |
| C | -0.557478000 | 3.044260000  | 1.236928000  |
| C | -3.225521000 | 1.489747000  | -0.586921000 |
| C | -3.147504000 | 2.353813000  | -1.731713000 |
| C | -3.551309000 | 3.656235000  | -1.334079000 |
| C | -3.866361000 | 3.617056000  | 0.056792000  |
| C | -3.656292000 | 2.289493000  | 0.523293000  |
| C | 4.925932000  | -1.852638000 | 0.637196000  |
| C | 5.240676000  | 1.189857000  | 1.967530000  |
| C | -6.653439000 | -3.888924000 | 0.424238000  |
| C | -8.015636000 | -1.448784000 | -1.408362000 |
| H | 0.697127000  | -4.970737000 | 0.449873000  |
| H | 1.424694000  | -3.202794000 | -3.390512000 |
| H | 1.868933000  | -2.035024000 | 2.402498000  |
| H | 2.668257000  | -3.606300000 | 2.291904000  |
| H | 0.912021000  | -3.523108000 | 2.459228000  |
| H | -0.089420000 | -6.100076000 | -1.504678000 |
| H | 1.089205000  | -5.943203000 | -2.815070000 |
| H | -0.449786000 | -5.091164000 | -2.915596000 |
| H | 3.678882000  | -0.703078000 | -2.217228000 |
| H | 2.073602000  | 0.000260000  | -2.398305000 |
| H | 2.657080000  | -1.178073000 | -3.588868000 |
| H | 1.467065000  | 3.936168000  | 4.500169000  |
| H | 2.776869000  | 5.703443000  | 0.815923000  |
| H | 1.545812000  | 1.565050000  | 4.823335000  |
| H | 2.622760000  | 0.608862000  | 3.787438000  |
| H | 0.920935000  | 0.789714000  | 3.363112000  |
| H | 1.776856000  | 6.360731000  | 4.348534000  |
| H | 0.767274000  | 6.649983000  | 2.928275000  |
| H | 2.474290000  | 7.092876000  | 2.890366000  |
| H | 4.350893000  | 2.897877000  | -0.526713000 |
| H | 3.468868000  | 4.354616000  | -1.021902000 |

|   |              |              |              |
|---|--------------|--------------|--------------|
| H | 2.698476000  | 2.762913000  | -1.109225000 |
| H | -1.627308000 | -5.475130000 | 0.796244000  |
| H | -3.205971000 | -3.498346000 | 4.261780000  |
| H | -2.649293000 | -5.082296000 | -1.381377000 |
| H | -2.245125000 | -3.367902000 | -1.498587000 |
| H | -3.932657000 | -3.876406000 | -1.594744000 |
| H | -0.802141000 | -4.780186000 | 4.144966000  |
| H | -0.787504000 | -6.078556000 | 2.940280000  |
| H | -2.039276000 | -6.033417000 | 4.193252000  |
| H | -4.823728000 | -1.763675000 | 4.060154000  |
| H | -5.959302000 | -1.985404000 | 2.717426000  |
| H | -4.663795000 | -0.794696000 | 2.591047000  |
| H | -5.450487000 | 1.542297000  | -5.017099000 |
| H | -7.104459000 | 3.644983000  | -1.663897000 |
| H | -5.490615000 | -1.698019000 | -3.503521000 |
| H | -3.892510000 | -0.975460000 | -3.342754000 |
| H | -4.816862000 | -0.745976000 | -4.838528000 |
| H | -5.597140000 | 4.623910000  | -4.177605000 |
| H | -7.349088000 | 4.535862000  | -3.989837000 |
| H | -6.555979000 | 3.710494000  | -5.345838000 |
| H | -6.880440000 | 2.697278000  | 0.563372000  |
| H | -6.188933000 | 1.089777000  | 0.812572000  |
| H | -7.875950000 | 1.257365000  | 0.321166000  |
| H | 0.226447000  | 3.001178000  | -2.027305000 |
| H | -0.683818000 | 5.389163000  | -1.155162000 |
| H | -1.247038000 | 5.153949000  | 1.470570000  |
| H | -0.706207000 | 2.623847000  | 2.219333000  |
| H | -2.847865000 | 2.049397000  | -2.724980000 |
| H | -3.581348000 | 4.532259000  | -1.968114000 |
| H | -4.171170000 | 4.460580000  | 0.662341000  |
| H | -3.771833000 | 1.934158000  | 1.537373000  |
| H | 4.590816000  | -2.759166000 | 1.150275000  |
| H | 5.899471000  | -1.563265000 | 1.032928000  |
| H | 5.063598000  | -2.090851000 | -0.421798000 |
| H | 5.018629000  | 1.464325000  | 3.004161000  |
| H | 5.498786000  | 2.104711000  | 1.425607000  |
| H | 6.113795000  | 0.536202000  | 1.952117000  |
| H | -6.627118000 | -3.943343000 | 1.517039000  |
| H | -6.070837000 | -4.731983000 | 0.039166000  |
| H | -7.688207000 | -4.008773000 | 0.101199000  |
| H | -8.534878000 | -0.577547000 | -0.998178000 |
| H | -8.618935000 | -2.333783000 | -1.202285000 |
| H | -7.955005000 | -1.316389000 | -2.493131000 |

Cartesian coordinates and energies ( $E_h$ ) of **5c [FcP<sub>2</sub>SnI]<sup>+</sup>I<sup>-</sup>**, scrf=(cpcm,solvent=thf)

E(RB3PW91) = -24197.7589891

Sum of electronic and zero-point Energies= -24196.688333

Sum of electronic and thermal Energies= -24196.615647

Sum of electronic and thermal Enthalpies= -24196.614703

Sum of electronic and thermal Free Energies= -24196.802897

|    |              |              |              |
|----|--------------|--------------|--------------|
| I  | 1.115560000  | -0.207291000 | 3.486555000  |
| Sn | 0.565408000  | 1.245878000  | 0.995264000  |
| I  | -7.088507000 | 0.209710000  | -2.607611000 |
| Fe | 0.684214000  | -3.044406000 | -0.175857000 |
| P  | -1.141016000 | -0.247644000 | -0.376729000 |
| P  | 2.122749000  | 0.048631000  | -0.799255000 |
| N  | -3.285933000 | 1.512258000  | -0.220425000 |
| N  | -3.830939000 | -0.335871000 | 0.747997000  |
| N  | 4.300652000  | 1.774398000  | -0.196414000 |
| N  | 4.963508000  | -0.057174000 | -1.120050000 |
| C  | -2.802085000 | 0.295226000  | 0.138343000  |
| C  | -4.617322000 | 1.648950000  | 0.162558000  |
| C  | -4.963659000 | 0.481073000  | 0.772489000  |
| C  | 3.865167000  | 0.559264000  | -0.614010000 |
| C  | 5.664917000  | 1.928529000  | -0.446794000 |
| C  | 6.083659000  | 0.769986000  | -1.025218000 |
| C  | -2.521762000 | 2.534866000  | -0.872009000 |
| C  | -1.979504000 | 3.567353000  | -0.095998000 |
| C  | -1.230678000 | 4.546156000  | -0.757016000 |
| C  | -1.022472000 | 4.506537000  | -2.135987000 |
| C  | -1.602025000 | 3.466070000  | -2.873390000 |
| C  | -2.372562000 | 2.474536000  | -2.267495000 |
| C  | -2.212702000 | 3.663113000  | 1.387644000  |
| C  | -0.231235000 | 5.579061000  | -2.834813000 |
| C  | -3.025168000 | 1.382801000  | -3.065760000 |
| C  | -3.791123000 | -1.620511000 | 1.380979000  |
| C  | -3.412999000 | -1.675938000 | 2.725922000  |
| C  | -3.399476000 | -2.929871000 | 3.338560000  |
| C  | -3.747382000 | -4.088621000 | 2.638765000  |
| C  | -4.136966000 | -3.977596000 | 1.300314000  |
| C  | -4.171027000 | -2.746945000 | 0.644719000  |
| C  | -3.004151000 | -0.428218000 | 3.456087000  |
| C  | -3.664183000 | -5.439184000 | 3.297262000  |
| C  | -4.574175000 | -2.619554000 | -0.795428000 |
| C  | 3.533889000  | 2.770545000  | 0.487753000  |
| C  | 2.840039000  | 3.733330000  | -0.252556000 |
| C  | 2.153061000  | 4.718325000  | 0.463828000  |

|   |              |              |              |
|---|--------------|--------------|--------------|
| C | 2.136594000  | 4.739728000  | 1.858900000  |
| C | 2.855884000  | 3.760304000  | 2.557215000  |
| C | 3.575656000  | 2.769234000  | 1.892743000  |
| C | 2.784040000  | 3.689302000  | -1.753514000 |
| C | 1.358824000  | 5.785045000  | 2.610750000  |
| C | 4.355887000  | 1.718985000  | 2.632005000  |
| C | 5.016630000  | -1.338403000 | -1.761420000 |
| C | 4.721258000  | -1.408165000 | -3.128077000 |
| C | 4.813457000  | -2.657752000 | -3.742024000 |
| C | 5.190452000  | -3.799695000 | -3.029220000 |
| C | 5.498886000  | -3.673611000 | -1.672203000 |
| C | 5.422149000  | -2.447588000 | -1.011492000 |
| C | 4.302441000  | -0.182324000 | -3.891201000 |
| C | 5.222379000  | -5.147513000 | -3.697217000 |
| C | 5.763026000  | -2.322058000 | 0.446834000  |
| C | -1.065423000 | -2.017391000 | -0.003832000 |
| C | -1.152868000 | -3.014707000 | -1.036805000 |
| C | -0.914621000 | -4.285652000 | -0.446275000 |
| C | -0.669762000 | -4.086515000 | 0.944734000  |
| C | -0.751384000 | -2.696020000 | 1.218055000  |
| C | 2.221209000  | -1.754380000 | -0.574353000 |
| C | 2.053327000  | -2.706068000 | -1.637253000 |
| C | 2.224470000  | -4.008826000 | -1.097927000 |
| C | 2.481736000  | -3.879830000 | 0.299439000  |
| C | 2.469849000  | -2.495804000 | 0.627821000  |
| C | -5.406408000 | 2.859125000  | -0.171916000 |
| C | -6.244552000 | 0.018352000  | 1.359725000  |
| C | 6.377882000  | 3.189590000  | -0.119963000 |
| C | 7.409959000  | 0.347067000  | -1.542283000 |
| H | -0.803388000 | 5.355501000  | -0.171400000 |
| H | -1.463265000 | 3.436293000  | -3.951617000 |
| H | -2.397558000 | 2.687395000  | 1.844192000  |
| H | -3.082935000 | 4.294768000  | 1.602403000  |
| H | -1.347826000 | 4.112119000  | 1.882198000  |
| H | 0.340966000  | 6.186160000  | -2.128477000 |
| H | -0.897062000 | 6.252842000  | -3.386428000 |
| H | 0.465600000  | 5.148359000  | -3.560176000 |
| H | -4.085213000 | 1.271538000  | -2.809320000 |
| H | -2.544113000 | 0.418591000  | -2.862538000 |
| H | -2.949071000 | 1.584134000  | -4.136655000 |
| H | -3.099558000 | -3.002868000 | 4.381233000  |
| H | -4.412723000 | -4.873122000 | 0.748739000  |
| H | -2.831348000 | -0.629681000 | 4.515257000  |
| H | -3.762913000 | 0.357444000  | 3.372324000  |
| H | -2.073269000 | -0.025813000 | 3.039883000  |

|   |              |              |              |
|---|--------------|--------------|--------------|
| H | -3.739160000 | -5.363582000 | 4.385582000  |
| H | -2.704441000 | -5.916587000 | 3.065013000  |
| H | -4.453641000 | -6.108446000 | 2.942532000  |
| H | -5.442927000 | -1.963865000 | -0.924421000 |
| H | -4.812961000 | -3.595356000 | -1.223887000 |
| H | -3.764583000 | -2.178666000 | -1.386327000 |
| H | 1.610896000  | 5.479851000  | -0.088678000 |
| H | 2.850430000  | 3.766375000  | 3.644236000  |
| H | 2.656888000  | 4.691972000  | -2.167345000 |
| H | 1.927947000  | 3.086760000  | -2.080857000 |
| H | 3.683127000  | 3.245211000  | -2.188741000 |
| H | 0.616040000  | 5.317177000  | 3.265803000  |
| H | 0.834112000  | 6.463197000  | 1.933157000  |
| H | 2.017966000  | 6.383813000  | 3.248647000  |
| H | 4.205574000  | 1.808496000  | 3.709015000  |
| H | 5.429123000  | 1.796469000  | 2.425724000  |
| H | 4.038172000  | 0.714525000  | 2.334300000  |
| H | 4.581101000  | -2.741011000 | -4.801112000 |
| H | 5.793094000  | -4.554977000 | -1.107678000 |
| H | 4.994216000  | 0.651403000  | -3.728439000 |
| H | 3.311962000  | 0.156594000  | -3.564140000 |
| H | 4.256834000  | -0.384801000 | -4.963378000 |
| H | 4.266418000  | -5.665454000 | -3.553026000 |
| H | 6.004715000  | -5.786176000 | -3.276951000 |
| H | 5.389051000  | -5.060475000 | -4.774462000 |
| H | 5.697255000  | -3.292429000 | 0.943211000  |
| H | 5.085399000  | -1.633981000 | 0.958224000  |
| H | 6.782078000  | -1.942487000 | 0.587075000  |
| H | -1.345287000 | -2.816926000 | -2.083215000 |
| H | -0.880843000 | -5.232638000 | -0.968810000 |
| H | -0.423485000 | -4.857976000 | 1.662231000  |
| H | -0.592998000 | -2.219847000 | 2.173359000  |
| H | 1.844789000  | -2.459617000 | -2.669116000 |
| H | 2.136815000  | -4.938064000 | -1.644873000 |
| H | 2.618855000  | -4.695218000 | 0.997575000  |
| H | 2.600162000  | -2.064200000 | 1.610148000  |
| H | -4.888673000 | 3.774392000  | 0.128231000  |
| H | -6.374815000 | 2.824690000  | 0.328490000  |
| H | -5.591745000 | 2.900538000  | -1.250287000 |
| H | -6.097590000 | -0.378800000 | 2.368910000  |
| H | -6.692903000 | -0.765644000 | 0.741316000  |
| H | -6.952127000 | 0.846945000  | 1.408537000  |
| H | 6.335814000  | 3.411435000  | 0.950923000  |
| H | 5.930141000  | 4.037605000  | -0.648223000 |
| H | 7.425917000  | 3.115845000  | -0.412934000 |

|   |             |              |              |
|---|-------------|--------------|--------------|
| H | 7.779801000 | -0.539938000 | -1.019470000 |
| H | 8.137446000 | 1.149135000  | -1.410908000 |
| H | 7.354596000 | 0.101170000  | -2.607513000 |

Cartesian coordinates and energies ( $E_h$ ) of **5c [FcP<sub>2</sub>SnI]<sup>+</sup>**

E(RB3PW91) = -17277.8905110

Sum of electronic and zero-point Energies= -17276.819252

Sum of electronic and thermal Energies= -17276.749018

Sum of electronic and thermal Enthalpies= -17276.748074

Sum of electronic and thermal Free Energies= -17276.928751

|    |              |              |              |
|----|--------------|--------------|--------------|
| I  | 0.326609000  | 0.001770000  | -3.170890000 |
| Sn | 0.203098000  | 1.319968000  | -0.611290000 |
| Fe | -0.078611000 | -3.044650000 | 0.294944000  |
| P  | 1.591673000  | -0.237389000 | 1.042210000  |
| P  | -1.705565000 | -0.007033000 | 0.696666000  |
| N  | 3.677170000  | 1.578563000  | 1.358072000  |
| N  | 4.463483000  | -0.264389000 | 0.554189000  |
| N  | -3.703667000 | 1.711001000  | -0.376304000 |
| N  | -4.529517000 | -0.171141000 | 0.277261000  |
| C  | 3.308080000  | 0.350139000  | 0.902586000  |
| C  | 5.061964000  | 1.731762000  | 1.302174000  |
| C  | 5.558823000  | 0.569866000  | 0.795668000  |
| C  | -3.354308000 | 0.484902000  | 0.092615000  |
| C  | -5.090889000 | 1.829951000  | -0.477301000 |
| C  | -5.610915000 | 0.640857000  | -0.068597000 |
| C  | 2.777558000  | 2.596677000  | 1.816546000  |
| C  | 2.431450000  | 3.634824000  | 0.942350000  |
| C  | 1.552503000  | 4.612617000  | 1.417394000  |
| C  | 1.028031000  | 4.567971000  | 2.708073000  |
| C  | 1.416039000  | 3.520908000  | 3.553160000  |
| C  | 2.303165000  | 2.530602000  | 3.137376000  |
| C  | 2.982383000  | 3.733965000  | -0.454724000 |
| C  | 0.097412000  | 5.638569000  | 3.209941000  |
| C  | 2.737038000  | 1.429008000  | 4.062725000  |
| C  | 4.602025000  | -1.540864000 | -0.083211000 |
| C  | 4.566022000  | -1.581214000 | -1.479988000 |
| C  | 4.732305000  | -2.825924000 | -2.088971000 |
| C  | 4.923378000  | -3.988855000 | -1.338970000 |
| C  | 4.965428000  | -3.892535000 | 0.055906000  |
| C  | 4.811557000  | -2.672402000 | 0.710782000  |
| C  | 4.310375000  | -0.332892000 | -2.275823000 |
| C  | 5.042636000  | -5.329948000 | -2.009881000 |
| C  | 4.847194000  | -2.560193000 | 2.208829000  |



|   |              |              |              |
|---|--------------|--------------|--------------|
| C | -2.817095000 | 2.738056000  | -0.832643000 |
| C | -2.344734000 | 3.694368000  | 0.072483000  |
| C | -1.523509000 | 4.704540000  | -0.434949000 |
| C | -1.162283000 | 4.754881000  | -1.781701000 |
| C | -1.664849000 | 3.778913000  | -2.651877000 |
| C | -2.510193000 | 2.765633000  | -2.204088000 |
| C | -2.644330000 | 3.606989000  | 1.542336000  |
| C | -0.248062000 | 5.829997000  | -2.302150000 |
| C | -3.061218000 | 1.720154000  | -3.132240000 |
| C | -4.710253000 | -1.479581000 | 0.835536000  |
| C | -4.765375000 | -1.603517000 | 2.229038000  |
| C | -4.981800000 | -2.878155000 | 2.752160000  |
| C | -5.144600000 | -3.993834000 | 1.925789000  |
| C | -5.102293000 | -3.814476000 | 0.541114000  |
| C | -4.888911000 | -2.561455000 | -0.032918000 |
| C | -4.579631000 | -0.405402000 | 3.118492000  |
| C | -5.323548000 | -5.366985000 | 2.513591000  |
| C | -4.856378000 | -2.381580000 | -1.524837000 |
| C | 1.638813000  | -1.989110000 | 0.587001000  |
| C | 1.498325000  | -3.029953000 | 1.570875000  |
| C | 1.435869000  | -4.276591000 | 0.890838000  |
| C | 1.525361000  | -4.019062000 | -0.509038000 |
| C | 1.637419000  | -2.617244000 | -0.701034000 |
| C | -1.699179000 | -1.796631000 | 0.363856000  |
| C | -1.774572000 | -2.802988000 | 1.386022000  |
| C | -1.773606000 | -4.076024000 | 0.756143000  |
| C | -1.679108000 | -3.873196000 | -0.652972000 |
| C | -1.621389000 | -2.473162000 | -0.898527000 |
| C | 5.725867000  | 2.977712000  | 1.763365000  |
| C | 6.944388000  | 0.135958000  | 0.481949000  |
| C | -5.730702000 | 3.089606000  | -0.936428000 |
| C | -7.012956000 | 0.171181000  | 0.074553000  |
| H | 1.270379000  | 5.422741000  | 0.750337000  |
| H | 1.028899000  | 3.485046000  | 4.568806000  |
| H | 3.356715000  | 2.776738000  | -0.825862000 |
| H | 3.808112000  | 4.454576000  | -0.497180000 |
| H | 2.207463000  | 4.079567000  | -1.144118000 |
| H | -0.272023000 | 6.270052000  | 2.397523000  |
| H | 0.607478000  | 6.291632000  | 3.927225000  |
| H | -0.765106000 | 5.204990000  | 3.725427000  |
| H | 3.819472000  | 1.269084000  | 4.016642000  |
| H | 2.255658000  | 0.484973000  | 3.781647000  |
| H | 2.469035000  | 1.657549000  | 5.096509000  |
| H | 4.698153000  | -2.888127000 | -3.173782000 |
| H | 5.113503000  | -4.792170000 | 0.648095000  |

|   |              |              |              |
|---|--------------|--------------|--------------|
| H | 4.401204000  | -0.520190000 | -3.347345000 |
| H | 5.004831000  | 0.471427000  | -2.007959000 |
| H | 3.294769000  | 0.039066000  | -2.096800000 |
| H | 5.313033000  | -5.233459000 | -3.064551000 |
| H | 4.087805000  | -5.866963000 | -1.960359000 |
| H | 5.793136000  | -5.958227000 | -1.520893000 |
| H | 5.686834000  | -1.942588000 | 2.547977000  |
| H | 4.942346000  | -3.543145000 | 2.674538000  |
| H | 3.931424000  | -2.093783000 | 2.586439000  |
| H | -1.144273000 | 5.457788000  | 0.249289000  |
| H | -1.381787000 | 3.799565000  | -3.700925000 |
| H | -2.620756000 | 4.596546000  | 2.004546000  |
| H | -1.888884000 | 2.988202000  | 2.042527000  |
| H | -3.620115000 | 3.155045000  | 1.740480000  |
| H | 0.592412000  | 5.393839000  | -2.852060000 |
| H | 0.155667000  | 6.445445000  | -1.493805000 |
| H | -0.775723000 | 6.494482000  | -2.995263000 |
| H | -2.625015000 | 1.812659000  | -4.127674000 |
| H | -4.150932000 | 1.797334000  | -3.221693000 |
| H | -2.830940000 | 0.713838000  | -2.768242000 |
| H | -5.024762000 | -3.002633000 | 3.831648000  |
| H | -5.227163000 | -4.674645000 | -0.111895000 |
| H | -5.232637000 | 0.423090000  | 2.821534000  |
| H | -3.548067000 | -0.036788000 | 3.061267000  |
| H | -4.797709000 | -0.651736000 | 4.159932000  |
| H | -4.354318000 | -5.871459000 | 2.608389000  |
| H | -5.957201000 | -5.996007000 | 1.881999000  |
| H | -5.769742000 | -5.325303000 | 3.510938000  |
| H | -4.613384000 | -3.322626000 | -2.022421000 |
| H | -4.109894000 | -1.641859000 | -1.824080000 |
| H | -5.826826000 | -2.044177000 | -1.908369000 |
| H | 1.426394000  | -2.875118000 | 2.639474000  |
| H | 1.299061000  | -5.245854000 | 1.351859000  |
| H | 1.471502000  | -4.759781000 | -1.295604000 |
| H | 1.690181000  | -2.103633000 | -1.648771000 |
| H | -1.832384000 | -2.610274000 | 2.448113000  |
| H | -1.799562000 | -5.033054000 | 1.259733000  |
| H | -1.613796000 | -4.650088000 | -1.403367000 |
| H | -1.502608000 | -1.991163000 | -1.858973000 |
| H | 5.461536000  | 3.831653000  | 1.131829000  |
| H | 6.810332000  | 2.859836000  | 1.739842000  |
| H | 5.428550000  | 3.224238000  | 2.787604000  |
| H | 7.056576000  | -0.084348000 | -0.584736000 |
| H | 7.211490000  | -0.773767000 | 1.028739000  |
| H | 7.656236000  | 0.919068000  | 0.747697000  |

|   |              |              |              |
|---|--------------|--------------|--------------|
| H | -5.424215000 | 3.350424000  | -1.954392000 |
| H | -5.452623000 | 3.928275000  | -0.289748000 |
| H | -6.817070000 | 2.989478000  | -0.921899000 |
| H | -7.217351000 | -0.686234000 | -0.573761000 |
| H | -7.708017000 | 0.970379000  | -0.187535000 |
| H | -7.218816000 | -0.143667000 | 1.102546000  |

Cartesian coordinates and energies ( $E_h$ ) of **XantP<sub>2</sub>**

E(RB3PW91) = -2260.46227557

Sum of electronic and zero-point Energies= -2259.743422

Sum of electronic and thermal Energies= -2259.702523

Sum of electronic and thermal Enthalpies= -2259.701579

Sum of electronic and thermal Free Energies= -2259.816242

|   |              |              |              |
|---|--------------|--------------|--------------|
| P | 1.452014000  | -0.213227000 | -0.952133000 |
| P | -1.884750000 | 2.726868000  | -1.247881000 |
| O | -1.450070000 | -0.266169000 | -0.777597000 |
| C | 2.855613000  | -0.799348000 | 0.003433000  |
| N | 4.162698000  | -0.800071000 | -0.412858000 |
| C | -1.007960000 | -1.558617000 | -0.705093000 |
| C | 0.398090000  | -1.700038000 | -0.728917000 |
| N | 2.903865000  | -1.234414000 | 1.306438000  |
| C | 0.898752000  | -3.011046000 | -0.683809000 |
| H | 1.973202000  | -3.166043000 | -0.742198000 |
| C | -1.881011000 | -2.643168000 | -0.602384000 |
| N | -0.855269000 | 2.001685000  | 1.371717000  |
| C | -2.786274000 | 0.011746000  | -0.853918000 |
| C | 4.992718000  | -1.242125000 | 0.598965000  |
| C | -3.757818000 | -0.986481000 | -0.761016000 |
| C | -3.393987000 | -2.457061000 | -0.580242000 |
| C | -1.323030000 | -3.924837000 | -0.516075000 |
| H | -1.977455000 | -4.787327000 | -0.430230000 |
| C | 4.205478000  | -1.525824000 | 1.664689000  |
| C | -0.739924000 | 2.512477000  | 0.101556000  |
| C | 1.784327000  | -1.159689000 | 2.254940000  |
| H | 0.997525000  | -0.639973000 | 1.696512000  |
| C | 5.177599000  | -1.780103000 | -2.422678000 |
| H | 6.090550000  | -2.109391000 | -1.914477000 |
| H | 5.427843000  | -1.584868000 | -3.469371000 |
| H | 4.447071000  | -2.593213000 | -2.389361000 |
| C | 0.311525000  | 2.226160000  | 2.081745000  |
| N | 0.532412000  | 3.035781000  | 0.049541000  |
| C | 0.054015000  | -4.110756000 | -0.559573000 |
| H | 0.470311000  | -5.113725000 | -0.514613000 |

|   |              |              |              |
|---|--------------|--------------|--------------|
| C | 2.184651000  | -0.308168000 | 3.458633000  |
| H | 2.944089000  | -0.801361000 | 4.074665000  |
| H | 1.309176000  | -0.145883000 | 4.094396000  |
| H | 2.568784000  | 0.663036000  | 3.137041000  |
| C | 4.599448000  | -0.519350000 | -1.785308000 |
| H | 3.672213000  | -0.251083000 | -2.306559000 |
| C | -3.107436000 | 1.382919000  | -0.995463000 |
| C | -5.101828000 | -0.598292000 | -0.839849000 |
| H | -5.878485000 | -1.354004000 | -0.762734000 |
| C | -1.851825000 | 0.081158000  | 2.537790000  |
| H | -1.501049000 | -0.578926000 | 1.741541000  |
| H | -2.789693000 | -0.317646000 | 2.934824000  |
| H | -1.116100000 | 0.068891000  | 3.350681000  |
| C | -2.073470000 | 1.494546000  | 2.005990000  |
| H | -2.826270000 | 1.456109000  | 1.220279000  |
| C | -4.468950000 | 1.709239000  | -1.081887000 |
| H | -4.742348000 | 2.756178000  | -1.186865000 |
| C | 1.299588000  | -2.543343000 | 2.670746000  |
| H | 1.003332000  | -3.131205000 | 1.801245000  |
| H | 0.431569000  | -2.443679000 | 3.329417000  |
| H | 2.079396000  | -3.083837000 | 3.220241000  |
| C | -4.020364000 | -3.279564000 | -1.727671000 |
| H | -5.109639000 | -3.178657000 | -1.736506000 |
| H | -3.788900000 | -4.343778000 | -1.623468000 |
| H | -3.637035000 | -2.937811000 | -2.692986000 |
| C | -3.944262000 | -2.953045000 | 0.774776000  |
| H | -3.502078000 | -2.383701000 | 1.597220000  |
| H | -3.711789000 | -4.011669000 | 0.928775000  |
| H | -5.031459000 | -2.835968000 | 0.823239000  |
| C | -5.459330000 | 0.733034000  | -1.010627000 |
| H | -6.507429000 | 1.012930000  | -1.071089000 |
| C | 5.564100000  | 0.661182000  | -1.810757000 |
| H | 5.115922000  | 1.541933000  | -1.343621000 |
| H | 5.817520000  | 0.911179000  | -2.845059000 |
| H | 6.497866000  | 0.429297000  | -1.285629000 |
| C | -2.555073000 | 2.469782000  | 3.078560000  |
| H | -1.840672000 | 2.546925000  | 3.905784000  |
| H | -3.510807000 | 2.130045000  | 3.488919000  |
| H | -2.696559000 | 3.465399000  | 2.648798000  |
| C | 1.169602000  | 2.873649000  | 1.262914000  |
| C | 0.784894000  | 5.107315000  | -1.250843000 |
| H | -0.297312000 | 5.260672000  | -1.220817000 |
| H | 1.164968000  | 5.522176000  | -2.189697000 |
| H | 1.240535000  | 5.657965000  | -0.419938000 |
| C | 1.122820000  | 3.619978000  | -1.155675000 |

|   |             |              |              |
|---|-------------|--------------|--------------|
| H | 0.635756000 | 3.083762000  | -1.981728000 |
| C | 2.624749000 | 3.363892000  | -1.217058000 |
| H | 3.175432000 | 3.954976000  | -0.476048000 |
| H | 2.995217000 | 3.652988000  | -2.204411000 |
| H | 2.835465000 | 2.302302000  | -1.064524000 |
| H | 6.060131000 | -1.326688000 | 0.474040000  |
| H | 4.464386000 | -1.899410000 | 2.642147000  |
| H | 0.422966000 | 1.918025000  | 3.107091000  |
| H | 2.176933000 | 3.211597000  | 1.436817000  |

Cartesian coordinates and energies ( $E_h$ ) of **[XantP<sub>2</sub>SnI]<sup>+</sup>**

E(RB3PW91) = -15201.1266463

Sum of electronic and zero-point Energies= -15200.403908

Sum of electronic and thermal Energies= -15200.358641

Sum of electronic and thermal Enthalpies= -15200.357697

Sum of electronic and thermal Free Energies= -15200.485639

|    |              |              |              |
|----|--------------|--------------|--------------|
| Sn | -0.000009000 | -0.277902000 | 0.832205000  |
| P  | 1.912876000  | -0.000647000 | -1.029560000 |
| P  | -1.912874000 | -0.000668000 | -1.029578000 |
| I  | 0.000000000  | -3.124026000 | 0.611984000  |
| O  | -0.000010000 | 1.988615000  | -0.958155000 |
| N  | -3.937974000 | -0.615864000 | 0.992964000  |
| N  | 4.017361000  | -1.823940000 | -0.808394000 |
| N  | -4.017340000 | -1.823988000 | -0.808382000 |
| N  | 3.937986000  | -0.615866000 | 0.992984000  |
| C  | -3.348137000 | -0.800977000 | -0.218005000 |
| C  | -3.679420000 | 3.750371000  | -0.517956000 |
| H  | -4.663802000 | 4.201595000  | -0.437871000 |
| C  | -4.965814000 | -1.516994000 | 1.149425000  |
| H  | -5.569379000 | -1.551859000 | 2.041702000  |
| C  | 3.563153000  | 2.367302000  | -0.660648000 |
| H  | 4.454746000  | 1.747115000  | -0.692716000 |
| C  | 2.300230000  | 1.778972000  | -0.766133000 |
| C  | 3.348148000  | -0.800950000 | -0.217991000 |
| C  | -2.300250000 | 1.778945000  | -0.766141000 |
| C  | -3.563180000 | 2.367259000  | -0.660635000 |
| H  | -4.454766000 | 1.747062000  | -0.692681000 |
| C  | -3.746600000 | -2.392211000 | -2.149394000 |
| H  | -2.926153000 | -1.785392000 | -2.543913000 |
| C  | 3.679380000  | 3.750416000  | -0.517991000 |
| H  | 4.663758000  | 4.201653000  | -0.437940000 |
| C  | 1.259905000  | 4.018873000  | -0.610408000 |
| C  | -1.190802000 | 2.640297000  | -0.770968000 |

|   |              |              |              |
|---|--------------|--------------|--------------|
| C | -3.499769000 | 0.296414000  | 2.072514000  |
| H | -2.691648000 | 0.890555000  | 1.639696000  |
| C | 2.546032000  | 4.559847000  | -0.483603000 |
| H | 2.666066000  | 5.633014000  | -0.372778000 |
| C | -5.011220000 | -2.277227000 | 0.024551000  |
| H | -5.662712000 | -3.092509000 | -0.244476000 |
| C | -1.259955000 | 4.018857000  | -0.610431000 |
| C | 1.190771000  | 2.640312000  | -0.770951000 |
| C | -2.546082000 | 4.559815000  | -0.483580000 |
| H | -2.666121000 | 5.632979000  | -0.372721000 |
| C | 3.746637000  | -2.392125000 | -2.149424000 |
| H | 2.926194000  | -1.785296000 | -2.543936000 |
| C | 4.965800000  | -1.517026000 | 1.149440000  |
| H | 5.569346000  | -1.551930000 | 2.041729000  |
| C | -4.970909000 | -2.220163000 | -3.041584000 |
| H | -4.731334000 | -2.562900000 | -4.051485000 |
| H | -5.273435000 | -1.170676000 | -3.098144000 |
| H | -5.820890000 | -2.810946000 | -2.685065000 |
| C | 3.499820000  | 0.296420000  | 2.072542000  |
| H | 2.691692000  | 0.890568000  | 1.639749000  |
| C | 2.960812000  | -0.526451000 | 3.240274000  |
| H | 2.201967000  | -1.240475000 | 2.907225000  |
| H | 2.504372000  | 0.142450000  | 3.974575000  |
| H | 3.761625000  | -1.081234000 | 3.739641000  |
| C | -4.632529000 | 1.230271000  | 2.483557000  |
| H | -5.000262000 | 1.808349000  | 1.634010000  |
| H | -4.260086000 | 1.931400000  | 3.234758000  |
| H | -5.468522000 | 0.682330000  | 2.929796000  |
| C | 3.283123000  | -3.837411000 | -2.014058000 |
| H | 4.073507000  | -4.477196000 | -1.607597000 |
| H | 3.016704000  | -4.224580000 | -3.001155000 |
| H | 2.406566000  | -3.904694000 | -1.364179000 |
| C | 4.970957000  | -2.220054000 | -3.041593000 |
| H | 5.273492000  | -1.170568000 | -3.098115000 |
| H | 4.731390000  | -2.562755000 | -4.051508000 |
| H | 5.820930000  | -2.810856000 | -2.685087000 |
| C | -0.000035000 | 4.888372000  | -0.612763000 |
| C | -0.000086000 | 5.789316000  | 0.638675000  |
| H | -0.879198000 | 6.438955000  | 0.655163000  |
| H | 0.878891000  | 6.439134000  | 0.655118000  |
| H | -0.000002000 | 5.186568000  | 1.551203000  |
| C | -2.960729000 | -0.526462000 | 3.240228000  |
| H | -3.761527000 | -1.081246000 | 3.739614000  |
| H | -2.504267000 | 0.142434000  | 3.974520000  |
| H | -2.201895000 | -1.240486000 | 2.907153000  |

|   |              |              |              |
|---|--------------|--------------|--------------|
| C | 5.011253000  | -2.277187000 | 0.024520000  |
| H | 5.662763000  | -3.092444000 | -0.244537000 |
| C | -0.000034000 | 5.758670000  | -1.888211000 |
| H | 0.000003000  | 5.132900000  | -2.785070000 |
| H | 0.885788000  | 6.400526000  | -1.917393000 |
| H | -0.885893000 | 6.400475000  | -1.917430000 |
| C | 4.632604000  | 1.230261000  | 2.483556000  |
| H | 5.468600000  | 0.682305000  | 2.929771000  |
| H | 4.260191000  | 1.931394000  | 3.234769000  |
| H | 5.000323000  | 1.808335000  | 1.634001000  |
| C | -3.283085000 | -3.837492000 | -2.013982000 |
| H | -2.406533000 | -3.904755000 | -1.364095000 |
| H | -3.016656000 | -4.224687000 | -3.001066000 |
| H | -4.073470000 | -4.477268000 | -1.607511000 |

Cartesian coordinates and energies ( $E_h$ ) of **6 FcP<sub>2</sub>CuCl**, scrf=(cpcm,solvent=thf)

E(RB3PW91) = -6437.87831401

Sum of electronic and zero-point Energies= -6436.809092

Sum of electronic and thermal Energies= -6436.739003

Sum of electronic and thermal Enthalpies= -6436.738059

Sum of electronic and thermal Free Energies= -6436.917479

|    |              |              |              |
|----|--------------|--------------|--------------|
| Fe | -0.040950000 | -2.949767000 | -0.032790000 |
| P  | -1.656335000 | -0.112582000 | -0.864702000 |
| P  | 1.656664000  | 0.093396000  | -0.423895000 |
| Cl | -0.799016000 | 0.930557000  | 2.962355000  |
| Cu | -0.176273000 | 0.664823000  | 0.799547000  |
| N  | -3.586518000 | 1.819630000  | -0.949952000 |
| N  | -4.487250000 | 0.042537000  | -0.115030000 |
| N  | 3.683725000  | 1.660975000  | 0.691057000  |
| N  | 4.491369000  | -0.230098000 | 0.036147000  |
| C  | -3.311445000 | 0.531331000  | -0.593358000 |
| C  | -4.921802000 | 2.137796000  | -0.700380000 |
| C  | -5.493788000 | 1.019812000  | -0.181649000 |
| C  | 3.322122000  | 0.457067000  | 0.171507000  |
| C  | 5.067172000  | 1.733201000  | 0.878533000  |
| C  | 5.575741000  | 0.542021000  | 0.467246000  |
| C  | -2.639058000 | 2.664774000  | -1.605777000 |
| C  | -1.798954000 | 3.482658000  | -0.844951000 |
| C  | -0.861140000 | 4.260976000  | -1.531730000 |
| C  | -0.750793000 | 4.230294000  | -2.921475000 |
| C  | -1.621935000 | 3.406040000  | -3.646393000 |
| C  | -2.572847000 | 2.612515000  | -3.008550000 |
| C  | -1.883969000 | 3.538691000  | 0.653439000  |

|   |              |              |              |
|---|--------------|--------------|--------------|
| C | 0.299507000  | 5.043400000  | -3.630268000 |
| C | -3.488418000 | 1.700496000  | -3.776649000 |
| C | -4.715791000 | -1.274568000 | 0.389869000  |
| C | -4.682337000 | -1.477216000 | 1.773571000  |
| C | -4.921563000 | -2.770016000 | 2.242129000  |
| C | -5.171371000 | -3.832403000 | 1.369408000  |
| C | -5.208291000 | -3.579831000 | -0.005033000 |
| C | -4.986818000 | -2.302510000 | -0.519131000 |
| C | -4.339234000 | -0.348694000 | 2.702936000  |
| C | -5.348039000 | -5.232254000 | 1.893351000  |
| C | -5.006951000 | -2.023058000 | -1.994991000 |
| C | 2.800762000  | 2.699189000  | 1.126702000  |
| C | 2.535266000  | 3.772395000  | 0.269372000  |
| C | 1.792757000  | 4.837051000  | 0.783351000  |
| C | 1.295782000  | 4.825413000  | 2.090759000  |
| C | 1.565626000  | 3.719329000  | 2.902196000  |
| C | 2.331093000  | 2.646988000  | 2.444812000  |
| C | 3.019633000  | 3.757590000  | -1.153496000 |
| C | 0.449956000  | 5.961736000  | 2.598700000  |
| C | 2.632904000  | 1.453587000  | 3.301694000  |
| C | 4.655238000  | -1.517095000 | -0.566743000 |
| C | 4.727149000  | -1.589891000 | -1.964583000 |
| C | 4.903566000  | -2.847832000 | -2.539873000 |
| C | 5.014220000  | -4.002735000 | -1.758827000 |
| C | 4.967556000  | -3.878063000 | -0.369387000 |
| C | 4.789775000  | -2.641519000 | 0.253963000  |
| C | 4.607051000  | -0.348219000 | -2.803059000 |
| C | 5.136749000  | -5.357464000 | -2.403070000 |
| C | 4.750935000  | -2.533594000 | 1.752806000  |
| C | -1.756104000 | -1.854006000 | -0.335821000 |
| C | -1.697275000 | -2.982590000 | -1.219754000 |
| C | -1.623933000 | -4.168989000 | -0.436526000 |
| C | -1.624443000 | -3.786524000 | 0.938477000  |
| C | -1.687836000 | -2.367325000 | 1.001268000  |
| C | 1.624216000  | -1.725691000 | -0.187056000 |
| C | 1.625943000  | -2.739063000 | -1.199683000 |
| C | 1.610574000  | -4.014684000 | -0.569570000 |
| C | 1.577663000  | -3.807862000 | 0.841992000  |
| C | 1.566594000  | -2.402909000 | 1.076701000  |
| C | -5.457470000 | 3.492026000  | -0.990757000 |
| C | -6.888317000 | 0.723619000  | 0.235941000  |
| C | 5.710505000  | 2.940855000  | 1.456613000  |
| C | 6.970121000  | 0.034608000  | 0.399024000  |
| H | -0.196694000 | 4.896449000  | -0.955505000 |
| H | -1.553562000 | 3.379053000  | -4.731705000 |



|   |              |              |              |
|---|--------------|--------------|--------------|
| H | -2.419786000 | 2.683696000  | 1.068152000  |
| H | -2.390286000 | 4.455396000  | 0.979253000  |
| H | -0.882705000 | 3.534439000  | 1.093355000  |
| H | 0.668303000  | 5.858244000  | -3.001152000 |
| H | -0.086118000 | 5.473625000  | -4.559780000 |
| H | 1.159035000  | 4.416226000  | -3.894688000 |
| H | -4.541603000 | 1.901350000  | -3.552170000 |
| H | -3.297517000 | 0.655689000  | -3.503941000 |
| H | -3.340666000 | 1.809166000  | -4.853451000 |
| H | -4.889394000 | -2.954978000 | 3.313506000  |
| H | -5.405237000 | -4.398189000 | -0.693820000 |
| H | -4.390526000 | -0.669627000 | 3.746025000  |
| H | -5.011100000 | 0.506988000  | 2.576570000  |
| H | -3.323046000 | 0.015621000  | 2.510714000  |
| H | -5.728096000 | -5.235333000 | 2.918974000  |
| H | -4.386023000 | -5.759290000 | 1.897714000  |
| H | -6.034365000 | -5.813001000 | 1.269785000  |
| H | -5.698099000 | -1.208806000 | -2.239200000 |
| H | -5.303027000 | -2.908990000 | -2.561274000 |
| H | -4.013246000 | -1.712597000 | -2.337935000 |
| H | 1.603618000  | 5.700290000  | 0.149331000  |
| H | 1.172852000  | 3.688556000  | 3.914925000  |
| H | 2.808142000  | 4.706150000  | -1.651515000 |
| H | 2.519727000  | 2.959829000  | -1.715323000 |
| H | 4.096115000  | 3.566435000  | -1.216844000 |
| H | -0.612575000 | 5.753735000  | 2.424747000  |
| H | 0.687440000  | 6.899715000  | 2.088617000  |
| H | 0.580909000  | 6.110313000  | 3.674411000  |
| H | 2.267075000  | 1.595999000  | 4.319796000  |
| H | 3.707591000  | 1.242503000  | 3.337825000  |
| H | 2.129148000  | 0.575599000  | 2.881196000  |
| H | 4.952891000  | -2.928579000 | -3.623554000 |
| H | 5.052980000  | -4.768153000 | 0.249644000  |
| H | 5.307379000  | 0.427016000  | -2.472226000 |
| H | 3.598697000  | 0.075120000  | -2.717378000 |
| H | 4.805292000  | -0.563612000 | -3.855566000 |
| H | 4.144097000  | -5.800680000 | -2.549601000 |
| H | 5.713021000  | -6.048817000 | -1.781200000 |
| H | 5.615428000  | -5.296243000 | -3.384737000 |
| H | 4.310194000  | -3.432581000 | 2.189724000  |
| H | 4.161776000  | -1.674099000 | 2.079715000  |
| H | 5.760520000  | -2.423242000 | 2.166702000  |
| H | -1.693135000 | -2.927594000 | -2.300969000 |
| H | -1.546148000 | -5.180464000 | -0.814674000 |
| H | -1.548962000 | -4.458755000 | 1.783524000  |

|   |              |              |              |
|---|--------------|--------------|--------------|
| H | -1.664112000 | -1.751638000 | 1.890981000  |
| H | 1.653241000  | -2.553341000 | -2.264921000 |
| H | 1.599758000  | -4.973141000 | -1.072285000 |
| H | 1.530769000  | -4.581490000 | 1.597768000  |
| H | 1.510603000  | -1.908234000 | 2.037717000  |
| H | -4.942093000 | 4.252507000  | -0.393972000 |
| H | -6.522712000 | 3.538758000  | -0.759030000 |
| H | -5.322334000 | 3.756691000  | -2.044871000 |
| H | -6.946616000 | 0.439838000  | 1.291785000  |
| H | -7.302922000 | -0.106469000 | -0.346503000 |
| H | -7.521106000 | 1.599383000  | 0.082256000  |
| H | 5.340342000  | 3.139331000  | 2.468125000  |
| H | 5.501722000  | 3.830406000  | 0.853343000  |
| H | 6.791983000  | 2.805461000  | 1.507867000  |
| H | 7.119633000  | -0.824957000 | 1.059934000  |
| H | 7.670347000  | 0.817301000  | 0.695272000  |
| H | 7.221356000  | -0.285982000 | -0.617350000 |

Cartesian coordinates and energies ( $E_h$ ) of **7 [bisNHCPSnCl]<sup>+</sup>**

E(RB3PW91) = -8517.17593642

Sum of electronic and zero-point Energies= -8516.300440

Sum of electronic and thermal Energies= -8516.246005

Sum of electronic and thermal Enthalpies= -8516.245061

Sum of electronic and thermal Free Energies= -8516.391575

|    |              |              |              |
|----|--------------|--------------|--------------|
| Sn | 1.639310000  | -0.233926000 | -0.041352000 |
| Cl | 2.156191000  | -0.490787000 | -2.439511000 |
| N  | 0.026343000  | -3.417248000 | 0.317178000  |
| N  | -2.085641000 | -2.965358000 | -0.003329000 |
| N  | -0.654659000 | 3.586461000  | 0.183159000  |
| N  | 1.517556000  | 3.350562000  | 0.244666000  |
| N  | -0.461388000 | -1.162337000 | -0.319148000 |
| N  | 0.293796000  | 1.470314000  | -0.556135000 |
| C  | -0.831327000 | -2.398903000 | -0.024715000 |
| C  | -0.685066000 | -4.593708000 | 0.537378000  |
| C  | -1.985944000 | -4.318901000 | 0.340194000  |
| C  | 0.357679000  | 2.704608000  | -0.090531000 |
| C  | -0.113798000 | 4.776872000  | 0.679050000  |
| C  | 1.225036000  | 4.625799000  | 0.722196000  |
| C  | -1.471820000 | -0.211974000 | -0.800993000 |
| C  | -0.791878000 | 1.003207000  | -1.415388000 |
| C  | 1.446565000  | -3.325624000 | 0.433861000  |
| C  | 2.230027000  | -3.513894000 | -0.714766000 |
| C  | 3.614293000  | -3.391846000 | -0.572809000 |

|   |              |              |              |
|---|--------------|--------------|--------------|
| C | 4.207026000  | -3.132945000 | 0.666475000  |
| C | 3.389138000  | -3.020743000 | 1.797988000  |
| C | 2.001743000  | -3.105715000 | 1.706362000  |
| C | 1.585851000  | -3.832361000 | -2.032994000 |
| C | 5.694337000  | -2.941089000 | 0.780195000  |
| C | 1.111149000  | -2.913458000 | 2.901738000  |
| C | -3.376609000 | -2.351291000 | -0.120815000 |
| C | -4.089714000 | -2.517973000 | -1.316168000 |
| C | -5.391124000 | -2.021601000 | -1.365947000 |
| C | -5.982873000 | -1.391392000 | -0.265337000 |
| C | -5.225921000 | -1.226343000 | 0.896904000  |
| C | -3.917925000 | -1.706356000 | 0.996062000  |
| C | -3.460064000 | -3.209717000 | -2.493837000 |
| C | -7.418863000 | -0.947042000 | -0.336345000 |
| C | -3.107015000 | -1.552185000 | 2.252690000  |
| C | -2.040053000 | 3.245457000  | 0.301686000  |
| C | -2.436506000 | 2.427526000  | 1.367679000  |
| C | -3.794361000 | 2.116444000  | 1.473382000  |
| C | -4.734067000 | 2.612623000  | 0.568185000  |
| C | -4.292728000 | 3.432459000  | -0.476320000 |
| C | -2.948649000 | 3.765500000  | -0.630968000 |
| C | -1.433299000 | 1.903499000  | 2.358365000  |
| C | -6.196542000 | 2.294246000  | 0.703674000  |
| C | -2.475020000 | 4.636618000  | -1.761805000 |
| C | 2.830189000  | 2.802722000  | 0.087603000  |
| C | 3.532234000  | 2.404779000  | 1.236211000  |
| C | 4.792440000  | 1.832711000  | 1.057190000  |
| C | 5.337744000  | 1.641703000  | -0.215670000 |
| C | 4.610857000  | 2.071919000  | -1.330410000 |
| C | 3.357788000  | 2.671132000  | -1.207368000 |
| C | 2.918962000  | 2.539091000  | 2.602663000  |
| C | 6.679038000  | 0.985418000  | -0.398510000 |
| C | 2.578378000  | 3.112502000  | -2.411708000 |
| H | -0.175064000 | -5.504478000 | 0.805910000  |
| H | -2.869852000 | -4.931268000 | 0.412438000  |
| H | -0.750477000 | 5.601425000  | 0.955226000  |
| H | 2.010782000  | 5.300735000  | 1.019899000  |
| H | -2.126786000 | 0.118968000  | 0.013577000  |
| H | -2.109780000 | -0.666070000 | -1.566139000 |
| H | -0.350582000 | 0.726138000  | -2.380535000 |
| H | -1.544519000 | 1.772991000  | -1.598139000 |
| H | 4.240011000  | -3.493988000 | -1.455028000 |
| H | 3.843530000  | -2.836287000 | 2.768197000  |
| H | 2.326646000  | -3.858913000 | -2.833331000 |
| H | 0.843062000  | -3.075074000 | -2.299813000 |

|   |              |              |              |
|---|--------------|--------------|--------------|
| H | 1.078791000  | -4.803150000 | -1.992075000 |
| H | 6.231344000  | -3.461426000 | -0.017143000 |
| H | 6.074874000  | -3.299145000 | 1.740989000  |
| H | 5.941588000  | -1.875728000 | 0.703900000  |
| H | 0.467097000  | -2.035367000 | 2.766810000  |
| H | 1.698001000  | -2.764458000 | 3.810329000  |
| H | 0.449718000  | -3.772063000 | 3.057627000  |
| H | -5.966399000 | -2.144972000 | -2.280568000 |
| H | -5.671949000 | -0.737152000 | 1.758959000  |
| H | -2.494154000 | -2.761037000 | -2.751987000 |
| H | -4.105672000 | -3.157603000 | -3.372844000 |
| H | -3.265720000 | -4.266476000 | -2.280346000 |
| H | -7.717549000 | -0.386945000 | 0.552562000  |
| H | -8.083945000 | -1.813508000 | -0.422115000 |
| H | -7.600047000 | -0.318081000 | -1.214396000 |
| H | -2.750031000 | -2.522023000 | 2.615929000  |
| H | -3.693582000 | -1.087096000 | 3.048012000  |
| H | -2.220004000 | -0.931982000 | 2.079592000  |
| H | -4.124821000 | 1.483883000  | 2.292967000  |
| H | -5.016656000 | 3.823580000  | -1.187308000 |
| H | -1.930381000 | 1.480536000  | 3.233830000  |
| H | -0.757603000 | 2.695312000  | 2.699195000  |
| H | -0.810072000 | 1.120260000  | 1.909792000  |
| H | -6.397225000 | 1.674239000  | 1.580358000  |
| H | -6.560465000 | 1.759356000  | -0.178606000 |
| H | -6.789516000 | 3.210097000  | 0.796927000  |
| H | -2.129155000 | 5.611364000  | -1.400503000 |
| H | -3.275410000 | 4.814264000  | -2.482938000 |
| H | -1.631320000 | 4.180146000  | -2.290838000 |
| H | 5.348930000  | 1.505248000  | 1.931642000  |
| H | 5.023882000  | 1.927546000  | -2.325062000 |
| H | 3.542649000  | 2.058661000  | 3.359191000  |
| H | 1.927912000  | 2.070754000  | 2.633600000  |
| H | 2.786466000  | 3.586767000  | 2.893124000  |
| H | 6.594060000  | 0.104610000  | -1.043822000 |
| H | 7.110568000  | 0.670316000  | 0.555038000  |
| H | 7.388580000  | 1.668556000  | -0.877761000 |
| H | 3.228168000  | 3.206410000  | -3.283824000 |
| H | 2.084292000  | 4.074274000  | -2.241350000 |
| H | 1.809168000  | 2.370140000  | -2.650609000 |

Cartesian coordinates and energies ( $E_h$ ) of **7** [bisNHCPsSnCl]<sup>+</sup>, scrf=(cpcm,solvent=thf)

E(RB3PW91) = -8517.22414533

Sum of electronic and zero-point Energies= -8516.349355

Sum of electronic and thermal Energies= -8516.294895  
 Sum of electronic and thermal Enthalpies= -8516.293950  
 Sum of electronic and thermal Free Energies= -8516.439528

|    |              |              |              |
|----|--------------|--------------|--------------|
| Sn | 1.630189000  | -0.261235000 | -0.230046000 |
| Cl | 1.921026000  | -0.590036000 | -2.716381000 |
| N  | 0.020311000  | -3.379404000 | 0.380540000  |
| N  | -2.087803000 | -2.960724000 | 0.008215000  |
| N  | -0.596832000 | 3.547542000  | 0.268598000  |
| N  | 1.572265000  | 3.292169000  | 0.217769000  |
| N  | -0.475376000 | -1.151474000 | -0.343729000 |
| N  | 0.296582000  | 1.463180000  | -0.620148000 |
| C  | -0.840775000 | -2.383257000 | -0.011765000 |
| C  | -0.683037000 | -4.555919000 | 0.630979000  |
| C  | -1.982406000 | -4.300101000 | 0.401194000  |
| C  | 0.391187000  | 2.673927000  | -0.093408000 |
| C  | -0.021432000 | 4.710110000  | 0.792458000  |
| C  | 1.315988000  | 4.547204000  | 0.767444000  |
| C  | -1.502045000 | -0.197210000 | -0.787545000 |
| C  | -0.850911000 | 1.028805000  | -1.412551000 |
| C  | 1.422217000  | -3.237401000 | 0.603703000  |
| C  | 2.307683000  | -3.523392000 | -0.446027000 |
| C  | 3.672339000  | -3.331101000 | -0.206641000 |
| C  | 4.147129000  | -2.902597000 | 1.036780000  |
| C  | 3.230829000  | -2.693197000 | 2.075958000  |
| C  | 1.859497000  | -2.848003000 | 1.882487000  |
| C  | 1.789923000  | -4.016292000 | -1.766870000 |
| C  | 5.611309000  | -2.640895000 | 1.259919000  |
| C  | 0.864087000  | -2.554285000 | 2.969478000  |
| C  | -3.377409000 | -2.360505000 | -0.175168000 |
| C  | -4.022570000 | -2.521969000 | -1.408980000 |
| C  | -5.307877000 | -1.998292000 | -1.537979000 |
| C  | -5.946156000 | -1.343460000 | -0.477573000 |
| C  | -5.262278000 | -1.201185000 | 0.732349000  |
| C  | -3.973220000 | -1.710832000 | 0.910566000  |
| C  | -3.332015000 | -3.223115000 | -2.545725000 |
| C  | -7.347897000 | -0.823087000 | -0.650881000 |
| C  | -3.235810000 | -1.570905000 | 2.212995000  |
| C  | -1.982920000 | 3.222399000  | 0.426384000  |
| C  | -2.353913000 | 2.372691000  | 1.476630000  |
| C  | -3.713594000 | 2.083613000  | 1.625080000  |
| C  | -4.677336000 | 2.629599000  | 0.774769000  |
| C  | -4.260421000 | 3.480032000  | -0.255945000 |
| C  | -2.916424000 | 3.794351000  | -0.449853000 |
| C  | -1.324550000 | 1.791959000  | 2.406861000  |

|   |              |              |              |
|---|--------------|--------------|--------------|
| C | -6.139010000 | 2.325073000  | 0.952131000  |
| C | -2.468566000 | 4.699566000  | -1.563812000 |
| C | 2.866477000  | 2.721462000  | 0.008325000  |
| C | 3.595451000  | 2.278471000  | 1.124281000  |
| C | 4.832014000  | 1.674085000  | 0.891025000  |
| C | 5.328582000  | 1.490361000  | -0.403213000 |
| C | 4.580360000  | 1.969423000  | -1.483888000 |
| C | 3.348896000  | 2.602028000  | -1.305571000 |
| C | 3.036454000  | 2.396612000  | 2.515113000  |
| C | 6.626784000  | 0.767196000  | -0.638893000 |
| C | 2.546036000  | 3.097029000  | -2.473793000 |
| H | -0.170584000 | -5.449951000 | 0.946130000  |
| H | -2.860902000 | -4.919751000 | 0.476047000  |
| H | -0.635862000 | 5.526709000  | 1.134256000  |
| H | 2.120078000  | 5.201004000  | 1.062548000  |
| H | -2.128415000 | 0.119595000  | 0.053947000  |
| H | -2.161703000 | -0.641893000 | -1.537648000 |
| H | -0.482102000 | 0.777789000  | -2.413699000 |
| H | -1.605344000 | 1.808937000  | -1.525747000 |
| H | 4.376853000  | -3.518065000 | -1.012772000 |
| H | 3.593909000  | -2.375858000 | 3.050329000  |
| H | 2.595769000  | -4.090262000 | -2.499255000 |
| H | 1.030073000  | -3.340204000 | -2.169419000 |
| H | 1.328737000  | -5.003999000 | -1.656727000 |
| H | 6.223040000  | -3.037481000 | 0.445995000  |
| H | 5.955853000  | -3.083516000 | 2.199675000  |
| H | 5.795780000  | -1.562445000 | 1.322534000  |
| H | 0.254761000  | -1.679904000 | 2.709753000  |
| H | 1.366234000  | -2.344558000 | 3.915929000  |
| H | 0.173206000  | -3.389961000 | 3.119359000  |
| H | -5.829294000 | -2.110255000 | -2.485705000 |
| H | -5.746723000 | -0.696872000 | 1.563976000  |
| H | -2.373478000 | -2.746843000 | -2.782008000 |
| H | -3.949092000 | -3.212773000 | -3.446474000 |
| H | -3.110412000 | -4.265927000 | -2.294605000 |
| H | -7.744067000 | -0.408546000 | 0.279181000  |
| H | -8.021352000 | -1.621570000 | -0.979907000 |
| H | -7.385068000 | -0.039635000 | -1.416236000 |
| H | -2.887258000 | -2.542442000 | 2.578724000  |
| H | -3.869711000 | -1.122369000 | 2.980487000  |
| H | -2.347140000 | -0.939673000 | 2.099964000  |
| H | -4.025020000 | 1.429009000  | 2.434590000  |
| H | -5.002730000 | 3.909654000  | -0.924408000 |
| H | -1.796389000 | 1.346771000  | 3.285059000  |
| H | -0.617987000 | 2.556092000  | 2.747582000  |

|   |              |              |              |
|---|--------------|--------------|--------------|
| H | -0.737865000 | 1.011172000  | 1.908046000  |
| H | -6.323828000 | 1.731909000  | 1.850838000  |
| H | -6.523830000 | 1.766725000  | 0.093454000  |
| H | -6.725210000 | 3.246866000  | 1.026647000  |
| H | -2.076133000 | 5.645797000  | -1.175631000 |
| H | -3.296379000 | 4.929417000  | -2.237706000 |
| H | -1.664150000 | 4.241061000  | -2.149169000 |
| H | 5.407561000  | 1.313795000  | 1.740031000  |
| H | 4.962694000  | 1.845795000  | -2.493897000 |
| H | 3.680752000  | 1.889244000  | 3.236018000  |
| H | 2.039104000  | 1.946245000  | 2.576173000  |
| H | 2.934312000  | 3.440701000  | 2.828204000  |
| H | 6.434891000  | -0.261536000 | -0.965218000 |
| H | 7.233454000  | 0.719793000  | 0.269196000  |
| H | 7.216429000  | 1.251155000  | -1.423241000 |
| H | 3.169814000  | 3.184859000  | -3.365735000 |
| H | 2.094045000  | 4.071517000  | -2.265350000 |
| H | 1.735731000  | 2.394058000  | -2.696996000 |

Cartesian coordinates and energies ( $E_h$ ) of **7** [bisNHCPsSnCl]<sup>+</sup>, scrf=(cpcm,solvent=acetonitrile)

E(RB3PW91) = -8517.23072269

Sum of electronic and zero-point Energies= -8516.355989

Sum of electronic and thermal Energies= -8516.301543

Sum of electronic and thermal Enthalpies= -8516.300599

Sum of electronic and thermal Free Energies= -8516.446010

|    |              |              |              |
|----|--------------|--------------|--------------|
| Sn | 1.627936000  | -0.262062000 | -0.250304000 |
| Cl | 1.900047000  | -0.588671000 | -2.753828000 |
| N  | 0.027381000  | -3.372570000 | 0.404666000  |
| N  | -2.081935000 | -2.960272000 | 0.035739000  |
| N  | -0.602145000 | 3.540030000  | 0.278007000  |
| N  | 1.566806000  | 3.287496000  | 0.223369000  |
| N  | -0.471955000 | -1.155047000 | -0.349666000 |
| N  | 0.292858000  | 1.461592000  | -0.624460000 |
| C  | -0.835744000 | -2.382876000 | 0.001805000  |
| C  | -0.674162000 | -4.545643000 | 0.676004000  |
| C  | -1.974599000 | -4.293456000 | 0.448345000  |
| C  | 0.386195000  | 2.669889000  | -0.089919000 |
| C  | -0.027512000 | 4.700393000  | 0.807669000  |
| C  | 1.309951000  | 4.539310000  | 0.780526000  |
| C  | -1.503763000 | -0.201626000 | -0.784320000 |
| C  | -0.859544000 | 1.027529000  | -1.409977000 |
| C  | 1.430229000  | -3.226774000 | 0.618301000  |
| C  | 2.309451000  | -3.523830000 | -0.433443000 |

|   |              |              |              |
|---|--------------|--------------|--------------|
| C | 3.675566000  | -3.328085000 | -0.205002000 |
| C | 4.157494000  | -2.884110000 | 1.030318000  |
| C | 3.247234000  | -2.662207000 | 2.072316000  |
| C | 1.874769000  | -2.821315000 | 1.889603000  |
| C | 1.782736000  | -4.030343000 | -1.745698000 |
| C | 5.623286000  | -2.622994000 | 1.243800000  |
| C | 0.885788000  | -2.517754000 | 2.979664000  |
| C | -3.371828000 | -2.366430000 | -0.165537000 |
| C | -4.000598000 | -2.534071000 | -1.406857000 |
| C | -5.284013000 | -2.010777000 | -1.555461000 |
| C | -5.935902000 | -1.350875000 | -0.506438000 |
| C | -5.269330000 | -1.205719000 | 0.712852000  |
| C | -3.982619000 | -1.714387000 | 0.910336000  |
| C | -3.294346000 | -3.240150000 | -2.530817000 |
| C | -7.332620000 | -0.824914000 | -0.702381000 |
| C | -3.262891000 | -1.570127000 | 2.222058000  |
| C | -1.988751000 | 3.215264000  | 0.433423000  |
| C | -2.361272000 | 2.364122000  | 1.481916000  |
| C | -3.721418000 | 2.075930000  | 1.628650000  |
| C | -4.683850000 | 2.623920000  | 0.778029000  |
| C | -4.265372000 | 3.476138000  | -0.250672000 |
| C | -2.920891000 | 3.790049000  | -0.442416000 |
| C | -1.332912000 | 1.781526000  | 2.411975000  |
| C | -6.145849000 | 2.319200000  | 0.953244000  |
| C | -2.471071000 | 4.697714000  | -1.553517000 |
| C | 2.861307000  | 2.718368000  | 0.012974000  |
| C | 3.588895000  | 2.269103000  | 1.127378000  |
| C | 4.827085000  | 1.668323000  | 0.892338000  |
| C | 5.326743000  | 1.494375000  | -0.402056000 |
| C | 4.579672000  | 1.979350000  | -1.481119000 |
| C | 3.346501000  | 2.608263000  | -1.300722000 |
| C | 3.028653000  | 2.378971000  | 2.518342000  |
| C | 6.627438000  | 0.775994000  | -0.639201000 |
| C | 2.544720000  | 3.111437000  | -2.466322000 |
| H | -0.160090000 | -5.434452000 | 1.002960000  |
| H | -2.852563000 | -4.912153000 | 0.535944000  |
| H | -0.642541000 | 5.514234000  | 1.154827000  |
| H | 2.113474000  | 5.192096000  | 1.079293000  |
| H | -2.124876000 | 0.111022000  | 0.062506000  |
| H | -2.167179000 | -0.645076000 | -1.531571000 |
| H | -0.497957000 | 0.780872000  | -2.414779000 |
| H | -1.616186000 | 1.806315000  | -1.515651000 |
| H | 4.375602000  | -3.525441000 | -1.012638000 |
| H | 3.615926000  | -2.332106000 | 3.040295000  |
| H | 2.586672000  | -4.129178000 | -2.477431000 |



|   |              |              |              |
|---|--------------|--------------|--------------|
| H | 1.032130000  | -3.349332000 | -2.157734000 |
| H | 1.305914000  | -5.008489000 | -1.619306000 |
| H | 6.226548000  | -2.991578000 | 0.410656000  |
| H | 5.980123000  | -3.094347000 | 2.164991000  |
| H | 5.805202000  | -1.546737000 | 1.339841000  |
| H | 0.268241000  | -1.651704000 | 2.712219000  |
| H | 1.393936000  | -2.290717000 | 3.918828000  |
| H | 0.201990000  | -3.355982000 | 3.146682000  |
| H | -5.792565000 | -2.126274000 | -2.509735000 |
| H | -5.764970000 | -0.698444000 | 1.535973000  |
| H | -2.337602000 | -2.758190000 | -2.763037000 |
| H | -3.903343000 | -3.242894000 | -3.437119000 |
| H | -3.066596000 | -4.278546000 | -2.267292000 |
| H | -7.748952000 | -0.426030000 | 0.225772000  |
| H | -7.999889000 | -1.615234000 | -1.062101000 |
| H | -7.349952000 | -0.027052000 | -1.453521000 |
| H | -2.921100000 | -2.540621000 | 2.596651000  |
| H | -3.906302000 | -1.116888000 | 2.978718000  |
| H | -2.371349000 | -0.941454000 | 2.118556000  |
| H | -4.034211000 | 1.420564000  | 2.436949000  |
| H | -5.006647000 | 3.907466000  | -0.919187000 |
| H | -1.805710000 | 1.330642000  | 3.286663000  |
| H | -0.629277000 | 2.545840000  | 2.758196000  |
| H | -0.742853000 | 1.004677000  | 1.911178000  |
| H | -6.331980000 | 1.727900000  | 1.852898000  |
| H | -6.528866000 | 1.758711000  | 0.095102000  |
| H | -6.732610000 | 3.240948000  | 1.024058000  |
| H | -2.076847000 | 5.641757000  | -1.161895000 |
| H | -3.298445000 | 4.930964000  | -2.226795000 |
| H | -1.667321000 | 4.239375000  | -2.139899000 |
| H | 5.401795000  | 1.304028000  | 1.740186000  |
| H | 4.965526000  | 1.865345000  | -2.491037000 |
| H | 3.674087000  | 1.870025000  | 3.237073000  |
| H | 2.032510000  | 1.926033000  | 2.577321000  |
| H | 2.923637000  | 3.421487000  | 2.835471000  |
| H | 6.439468000  | -0.256186000 | -0.956888000 |
| H | 7.238153000  | 0.737547000  | 0.266588000  |
| H | 7.210887000  | 1.257363000  | -1.429732000 |
| H | 3.166908000  | 3.195700000  | -3.359792000 |
| H | 2.101383000  | 4.089206000  | -2.254747000 |
| H | 1.726841000  | 2.416646000  | -2.687758000 |

Cartesian coordinates and energies ( $E_h$ ) of **7** [bisNHCPsSnCl]<sup>+</sup>[SnCl<sub>3</sub>]<sup>-</sup>, scrf=(cpcm,solvent=THF)

E(RB3PW91) = -15919.1377496

Sum of electronic and zero-point Energies= -15918.259496

Sum of electronic and thermal Energies= -15918.196501  
Sum of electronic and thermal Enthalpies= -15918.195557  
Sum of electronic and thermal Free Energies= -15918.365376

108

symmetry c1

|    |              |              |              |
|----|--------------|--------------|--------------|
| Sn | 2.143647000  | -1.288530000 | -0.133685000 |
| Sn | -7.013528000 | -1.122220000 | -0.189017000 |
| Cl | 2.144622000  | -1.767816000 | -2.611516000 |
| Cl | -5.086696000 | -2.142609000 | -1.428290000 |
| Cl | -6.064478000 | 1.204462000  | -0.273957000 |
| Cl | -6.029821000 | -1.607411000 | 2.079895000  |
| N  | -1.289656000 | -1.506085000 | 0.673106000  |
| N  | -1.980763000 | 0.548731000  | 0.454402000  |
| N  | 4.222230000  | 2.647509000  | 0.236016000  |
| N  | 5.142597000  | 0.667046000  | 0.289709000  |
| N  | 0.284806000  | 0.009178000  | -0.310607000 |
| N  | 2.920367000  | 0.749234000  | -0.564460000 |
| C  | -0.904537000 | -0.268987000 | 0.221802000  |
| C  | -2.588743000 | -1.451560000 | 1.179659000  |
| C  | -3.014703000 | -0.185478000 | 1.045761000  |
| C  | 3.996373000  | 1.329739000  | -0.059638000 |
| C  | 5.511108000  | 2.793646000  | 0.759857000  |
| C  | 6.074103000  | 1.570341000  | 0.798980000  |
| C  | 0.560336000  | 1.386856000  | -0.740696000 |
| C  | 1.939804000  | 1.468905000  | -1.374682000 |
| C  | -0.537538000 | -2.712284000 | 0.563317000  |
| C  | -0.472588000 | -3.348449000 | -0.688391000 |
| C  | 0.295912000  | -4.510419000 | -0.778769000 |
| C  | 0.948255000  | -5.050597000 | 0.335355000  |
| C  | 0.800960000  | -4.420011000 | 1.575857000  |
| C  | 0.065476000  | -3.242575000 | 1.715487000  |
| C  | -1.198777000 | -2.774843000 | -1.870419000 |
| C  | 1.807893000  | -6.277006000 | 0.188996000  |
| C  | -0.039347000 | -2.526345000 | 3.032359000  |
| C  | -2.201139000 | 1.910059000  | 0.062651000  |
| C  | -2.677236000 | 2.160589000  | -1.231636000 |
| C  | -2.947272000 | 3.485192000  | -1.572556000 |
| C  | -2.778804000 | 4.530194000  | -0.656270000 |
| C  | -2.318408000 | 4.229870000  | 0.628356000  |
| C  | -2.025520000 | 2.918906000  | 1.013102000  |
| C  | -2.879197000 | 1.028743000  | -2.198018000 |
| C  | -3.098492000 | 5.945191000  | -1.059507000 |
| C  | -1.542855000 | 2.585482000  | 2.396682000  |
| C  | 3.222211000  | 3.668026000  | 0.334888000  |

|   |              |              |              |
|---|--------------|--------------|--------------|
| C | 2.303501000  | 3.601551000  | 1.390489000  |
| C | 1.343064000  | 4.613139000  | 1.475689000  |
| C | 1.298253000  | 5.663578000  | 0.556174000  |
| C | 2.246051000  | 5.696528000  | -0.472974000 |
| C | 3.222038000  | 4.709489000  | -0.603734000 |
| C | 2.351158000  | 2.478318000  | 2.389888000  |
| C | 0.248702000  | 6.735992000  | 0.651887000  |
| C | 4.230924000  | 4.737069000  | -1.718426000 |
| C | 5.349900000  | -0.738939000 | 0.138518000  |
| C | 5.340841000  | -1.546693000 | 1.287750000  |
| C | 5.499409000  | -2.921570000 | 1.112797000  |
| C | 5.645058000  | -3.489087000 | -0.157752000 |
| C | 5.665467000  | -2.645313000 | -1.272675000 |
| C | 5.534814000  | -1.260351000 | -1.151370000 |
| C | 5.106508000  | -0.951848000 | 2.648645000  |
| C | 5.805687000  | -4.976399000 | -0.320334000 |
| C | 5.546067000  | -0.360649000 | -2.353233000 |
| H | -3.088018000 | -2.332068000 | 1.546692000  |
| H | -3.963450000 | 0.275640000  | 1.260755000  |
| H | 5.881299000  | 3.761296000  | 1.056244000  |
| H | 7.050390000  | 1.243087000  | 1.116749000  |
| H | 0.509998000  | 2.078996000  | 0.108189000  |
| H | -0.166025000 | 1.728698000  | -1.482822000 |
| H | 1.916862000  | 0.993251000  | -2.362131000 |
| H | 2.199905000  | 2.517977000  | -1.520982000 |
| H | 0.385046000  | -5.005658000 | -1.742235000 |
| H | 1.291417000  | -4.840569000 | 2.450138000  |
| H | -1.146552000 | -3.451150000 | -2.725798000 |
| H | -0.750629000 | -1.821491000 | -2.170119000 |
| H | -2.250971000 | -2.586793000 | -1.632028000 |
| H | 1.334128000  | -7.020441000 | -0.459262000 |
| H | 2.014496000  | -6.743419000 | 1.155739000  |
| H | 2.769501000  | -6.015211000 | -0.267091000 |
| H | 0.326235000  | -1.496319000 | 2.944764000  |
| H | 0.547660000  | -3.033034000 | 3.801202000  |
| H | -1.076929000 | -2.464964000 | 3.376511000  |
| H | -3.314243000 | 3.706257000  | -2.572110000 |
| H | -2.193040000 | 5.030332000  | 1.352620000  |
| H | -1.938658000 | 0.504163000  | -2.405736000 |
| H | -3.280377000 | 1.390241000  | -3.147147000 |
| H | -3.575877000 | 0.290112000  | -1.788304000 |
| H | -3.065941000 | 6.626341000  | -0.205173000 |
| H | -4.095621000 | 6.009347000  | -1.507200000 |
| H | -2.387355000 | 6.310117000  | -1.809900000 |
| H | -2.225430000 | 1.890875000  | 2.897479000  |

|   |              |              |              |
|---|--------------|--------------|--------------|
| H | -1.459197000 | 3.483072000  | 3.013101000  |
| H | -0.563338000 | 2.096191000  | 2.366372000  |
| H | 0.622374000  | 4.584477000  | 2.287762000  |
| H | 2.222648000  | 6.511546000  | -1.192453000 |
| H | 1.734708000  | 2.704060000  | 3.262372000  |
| H | 3.374499000  | 2.292048000  | 2.732244000  |
| H | 1.983946000  | 1.542665000  | 1.950822000  |
| H | -0.236542000 | 6.740149000  | 1.631162000  |
| H | -0.528432000 | 6.576621000  | -0.102515000 |
| H | 0.676332000  | 7.727576000  | 0.474951000  |
| H | 5.244480000  | 4.900065000  | -1.336159000 |
| H | 4.006236000  | 5.534503000  | -2.429696000 |
| H | 4.248139000  | 3.785781000  | -2.261553000 |
| H | 5.479785000  | -3.567819000 | 1.986815000  |
| H | 5.782543000  | -3.073902000 | -2.264691000 |
| H | 5.011592000  | -1.734595000 | 3.403969000  |
| H | 4.187826000  | -0.354108000 | 2.661078000  |
| H | 5.922701000  | -0.286810000 | 2.949399000  |
| H | 5.373908000  | -5.322669000 | -1.263567000 |
| H | 5.328899000  | -5.521981000 | 0.498567000  |
| H | 6.866942000  | -5.252480000 | -0.325477000 |
| H | 5.936707000  | -0.883773000 | -3.228489000 |
| H | 6.154961000  | 0.531803000  | -2.177839000 |
| H | 4.527482000  | -0.030457000 | -2.584785000 |

Cartesian coordinates and energies ( $E_h$ ) of **7** **[bisNHCPsSnCl]<sup>+</sup>[SnCl<sub>3</sub>]<sup>-</sup>**,  
 scrf=(cpcm,solvent=acetonitrile)

E(RB3PW91) = -15919.1440922

|                                              |               |
|----------------------------------------------|---------------|
| Sum of electronic and zero-point Energies=   | -15918.266011 |
| Sum of electronic and thermal Energies=      | -15918.202953 |
| Sum of electronic and thermal Enthalpies=    | -15918.202009 |
| Sum of electronic and thermal Free Energies= | -15918.371804 |

|    |              |              |              |
|----|--------------|--------------|--------------|
| Sn | 2.147036000  | -1.286603000 | -0.170027000 |
| Sn | -7.042523000 | -1.133884000 | -0.205267000 |
| Cl | 2.090147000  | -1.727697000 | -2.667404000 |
| Cl | -5.113826000 | -2.165192000 | -1.437817000 |
| Cl | -6.082949000 | 1.190229000  | -0.297771000 |
| Cl | -6.057908000 | -1.606856000 | 2.068877000  |
| N  | -1.280518000 | -1.499557000 | 0.698999000  |
| N  | -1.988131000 | 0.545938000  | 0.449046000  |
| N  | 4.218267000  | 2.636313000  | 0.259908000  |
| N  | 5.140316000  | 0.656807000  | 0.275677000  |
| N  | 0.282791000  | 0.014792000  | -0.304993000 |

|   |              |              |              |
|---|--------------|--------------|--------------|
| N | 2.916878000  | 0.751758000  | -0.574322000 |
| C | -0.903349000 | -0.265737000 | 0.231113000  |
| C | -2.582053000 | -1.449351000 | 1.198739000  |
| C | -3.018287000 | -0.188775000 | 1.045506000  |
| C | 3.994004000  | 1.325014000  | -0.059644000 |
| C | 5.507591000  | 2.774366000  | 0.784726000  |
| C | 6.071828000  | 1.551127000  | 0.800963000  |
| C | 0.556477000  | 1.395478000  | -0.729285000 |
| C | 1.933445000  | 1.484673000  | -1.368267000 |
| C | -0.512139000 | -2.698028000 | 0.624663000  |
| C | -0.453316000 | -3.379059000 | -0.602687000 |
| C | 0.332858000  | -4.532011000 | -0.660901000 |
| C | 1.010710000  | -5.017482000 | 0.463107000  |
| C | 0.869434000  | -4.342807000 | 1.681533000  |
| C | 0.116321000  | -3.173403000 | 1.787418000  |
| C | -1.204333000 | -2.859416000 | -1.794592000 |
| C | 1.898108000  | -6.227656000 | 0.354417000  |
| C | 0.018945000  | -2.406759000 | 3.076133000  |
| C | -2.210015000 | 1.905300000  | 0.052116000  |
| C | -2.675699000 | 2.151746000  | -1.246624000 |
| C | -2.936224000 | 3.475981000  | -1.596808000 |
| C | -2.766318000 | 4.525106000  | -0.685089000 |
| C | -2.319827000 | 4.228376000  | 0.605447000  |
| C | -2.037175000 | 2.917847000  | 0.999457000  |
| C | -2.871656000 | 1.015749000  | -2.209823000 |
| C | -3.062571000 | 5.941557000  | -1.100479000 |
| C | -1.564116000 | 2.589860000  | 2.387623000  |
| C | 3.220248000  | 3.658122000  | 0.367151000  |
| C | 2.299238000  | 3.583211000  | 1.420066000  |
| C | 1.341576000  | 4.596989000  | 1.513635000  |
| C | 1.301311000  | 5.656580000  | 0.604444000  |
| C | 2.251013000  | 5.697070000  | -0.422851000 |
| C | 3.225061000  | 4.709078000  | -0.561062000 |
| C | 2.341378000  | 2.449734000  | 2.408066000  |
| C | 0.256411000  | 6.732815000  | 0.710451000  |
| C | 4.237304000  | 4.745831000  | -1.672369000 |
| C | 5.347450000  | -0.746494000 | 0.101162000  |
| C | 5.343991000  | -1.572505000 | 1.236790000  |
| C | 5.508846000  | -2.944506000 | 1.039166000  |
| C | 5.655849000  | -3.490564000 | -0.239853000 |
| C | 5.667844000  | -2.628548000 | -1.341940000 |
| C | 5.530218000  | -1.246938000 | -1.198216000 |
| C | 5.113611000  | -1.001774000 | 2.608618000  |
| C | 5.826948000  | -4.973235000 | -0.432079000 |
| C | 5.535248000  | -0.327472000 | -2.385285000 |

|   |              |              |              |
|---|--------------|--------------|--------------|
| H | -3.071540000 | -2.328910000 | 1.581048000  |
| H | -3.970874000 | 0.268000000  | 1.252154000  |
| H | 5.877324000  | 3.736695000  | 1.098414000  |
| H | 7.048318000  | 1.218947000  | 1.112825000  |
| H | 0.508324000  | 2.081304000  | 0.124572000  |
| H | -0.172067000 | 1.741447000  | -1.467001000 |
| H | 1.905234000  | 1.025661000  | -2.363273000 |
| H | 2.193956000  | 2.535460000  | -1.499841000 |
| H | 0.415543000  | -5.063470000 | -1.605534000 |
| H | 1.379655000  | -4.721935000 | 2.563439000  |
| H | -1.142485000 | -3.559051000 | -2.630454000 |
| H | -0.784584000 | -1.903548000 | -2.125879000 |
| H | -2.258917000 | -2.690536000 | -1.552111000 |
| H | 1.512538000  | -6.943481000 | -0.377070000 |
| H | 2.004863000  | -6.736794000 | 1.316012000  |
| H | 2.900952000  | -5.932202000 | 0.024873000  |
| H | 0.390782000  | -1.383260000 | 2.947676000  |
| H | 0.605650000  | -2.886248000 | 3.862293000  |
| H | -1.017545000 | -2.326146000 | 3.419459000  |
| H | -3.291586000 | 3.694434000  | -2.601168000 |
| H | -2.193950000 | 5.031929000  | 1.326042000  |
| H | -1.929630000 | 0.489856000  | -2.407484000 |
| H | -3.264065000 | 1.373823000  | -3.164004000 |
| H | -3.572009000 | 0.279512000  | -1.801889000 |
| H | -3.065624000 | 6.621390000  | -0.244537000 |
| H | -4.036796000 | 6.011256000  | -1.595035000 |
| H | -2.314630000 | 6.303842000  | -1.815595000 |
| H | -2.247800000 | 1.894291000  | 2.885521000  |
| H | -1.487560000 | 3.489523000  | 3.001660000  |
| H | -0.582836000 | 2.103725000  | 2.366288000  |
| H | 0.620419000  | 4.563085000  | 2.325056000  |
| H | 2.231320000  | 6.519301000  | -1.134170000 |
| H | 1.721540000  | 2.667368000  | 3.280219000  |
| H | 3.363001000  | 2.259062000  | 2.752835000  |
| H | 1.975111000  | 1.518598000  | 1.958678000  |
| H | -0.243322000 | 6.716352000  | 1.682243000  |
| H | -0.509946000 | 6.598505000  | -0.059828000 |
| H | 0.693180000  | 7.725507000  | 0.564363000  |
| H | 5.249362000  | 4.905782000  | -1.284974000 |
| H | 4.014672000  | 5.549232000  | -2.377504000 |
| H | 4.256595000  | 3.799060000  | -2.223227000 |
| H | 5.496099000  | -3.604137000 | 1.903171000  |
| H | 5.788347000  | -3.041153000 | -2.340479000 |
| H | 5.011034000  | -1.798333000 | 3.348328000  |
| H | 4.201171000  | -0.395187000 | 2.632935000  |

|   |             |              |              |
|---|-------------|--------------|--------------|
| H | 5.936455000 | -0.350953000 | 2.922032000  |
| H | 5.273147000 | -5.325745000 | -1.307377000 |
| H | 5.485357000 | -5.534009000 | 0.441865000  |
| H | 6.882180000 | -5.222829000 | -0.594276000 |
| H | 5.923006000 | -0.835580000 | -3.270663000 |
| H | 6.144040000 | 0.562478000  | -2.197659000 |
| H | 4.515754000 | 0.007329000  | -2.606449000 |

Cartesian coordinates and energies ( $E_h$ ) of **bisNHCP**

E(RB3PW91) = -2035.97364634

Sum of electronic and zero-point Energies= -2035.102159

Sum of electronic and thermal Energies= -2035.051581

Sum of electronic and thermal Enthalpies= -2035.050637

Sum of electronic and thermal Free Energies= -2035.187156

|   |              |              |              |
|---|--------------|--------------|--------------|
| N | -0.440370000 | 2.425757000  | -1.160744000 |
| N | 1.532529000  | 2.202887000  | -0.178681000 |
| N | 0.440436000  | -2.426131000 | -1.160353000 |
| N | -1.532507000 | -2.202484000 | -0.178563000 |
| N | -0.507197000 | 1.401035000  | 0.959591000  |
| N | 0.507372000  | -1.401500000 | 0.960016000  |
| C | 0.163170000  | 1.938764000  | 0.008436000  |
| C | 0.526524000  | 2.956292000  | -2.015879000 |
| C | 1.725063000  | 2.823971000  | -1.420629000 |
| C | -0.163064000 | -1.938926000 | 0.008731000  |
| C | -0.526559000 | -2.956109000 | -2.015712000 |
| C | -1.725126000 | -2.823375000 | -1.420606000 |
| C | 0.134173000  | 0.755885000  | 2.083142000  |
| C | -0.134037000 | -0.756018000 | 2.083361000  |
| C | -1.840181000 | 2.500207000  | -1.412417000 |
| C | -2.392979000 | 1.705005000  | -2.428591000 |
| C | -3.749230000 | 1.844493000  | -2.723102000 |
| C | -4.570651000 | 2.720024000  | -2.010619000 |
| C | -3.996630000 | 3.476732000  | -0.988581000 |
| C | -2.637408000 | 3.393013000  | -0.679389000 |
| C | -1.564256000 | 0.659808000  | -3.115651000 |
| C | -6.044231000 | 2.805978000  | -2.307154000 |
| C | -2.049265000 | 4.220642000  | 0.422949000  |
| C | 2.524351000  | 2.312322000  | 0.848490000  |
| C | 3.530121000  | 1.338708000  | 0.933217000  |
| C | 4.507681000  | 1.488234000  | 1.918051000  |
| C | 4.501683000  | 2.565955000  | 2.806792000  |
| C | 3.489153000  | 3.520392000  | 2.687286000  |
| C | 2.495241000  | 3.416572000  | 1.712871000  |

|   |              |              |              |
|---|--------------|--------------|--------------|
| C | 3.497452000  | 0.151014000  | 0.025146000  |
| C | 5.544249000  | 2.678022000  | 3.887726000  |
| C | 1.397572000  | 4.435454000  | 1.606969000  |
| C | 1.840225000  | -2.500603000 | -1.412093000 |
| C | 2.637429000  | -3.393552000 | -0.679302000 |
| C | 3.996662000  | -3.477270000 | -0.988636000 |
| C | 4.570612000  | -2.720411000 | -2.010551000 |
| C | 3.749184000  | -1.844579000 | -2.722739000 |
| C | 2.393011000  | -1.705091000 | -2.428083000 |
| C | 2.049343000  | -4.221300000 | 0.422977000  |
| C | 6.044075000  | -2.806364000 | -2.307687000 |
| C | 1.564214000  | -0.659597000 | -3.114594000 |
| C | -2.524351000 | -2.311992000 | 0.848580000  |
| C | -2.495232000 | -3.416255000 | 1.712940000  |
| C | -3.489164000 | -3.520103000 | 2.687335000  |
| C | -4.501725000 | -2.565700000 | 2.806819000  |
| C | -4.507732000 | -1.487968000 | 1.918088000  |
| C | -3.530141000 | -1.338395000 | 0.933294000  |
| C | -1.397552000 | -4.435124000 | 1.607023000  |
| C | -5.544326000 | -2.677804000 | 3.887717000  |
| C | -3.497486000 | -0.150702000 | 0.025214000  |
| H | 0.253594000  | 3.372113000  | -2.972455000 |
| H | 2.713936000  | 3.104041000  | -1.746747000 |
| H | -0.253660000 | -3.371930000 | -2.972297000 |
| H | -2.714062000 | -3.103049000 | -1.746869000 |
| H | -0.285825000 | 1.165777000  | 3.013573000  |
| H | 1.217894000  | 0.906154000  | 2.132946000  |
| H | 0.285936000  | -1.165652000 | 3.013912000  |
| H | -1.217761000 | -0.906277000 | 2.133165000  |
| H | -4.181159000 | 1.227974000  | -3.508922000 |
| H | -4.620045000 | 4.163147000  | -0.419118000 |
| H | -0.692992000 | 1.083058000  | -3.624287000 |
| H | -2.154775000 | 0.109005000  | -3.852255000 |
| H | -1.188378000 | -0.057607000 | -2.378652000 |
| H | -6.594186000 | 2.017808000  | -1.778021000 |
| H | -6.247102000 | 2.681558000  | -3.375461000 |
| H | -6.463680000 | 3.765841000  | -1.991571000 |
| H | -1.773641000 | 3.566707000  | 1.257959000  |
| H | -2.755504000 | 4.976650000  | 0.775269000  |
| H | -1.135345000 | 4.723899000  | 0.093385000  |
| H | 5.288976000  | 0.735071000  | 1.996601000  |
| H | 3.472227000  | 4.369999000  | 3.367053000  |
| H | 2.596757000  | -0.445329000 | 0.223490000  |
| H | 4.369939000  | -0.491990000 | 0.161886000  |
| H | 3.457636000  | 0.448531000  | -1.026003000 |



|   |              |              |              |
|---|--------------|--------------|--------------|
| H | 5.707898000  | 3.718750000  | 4.183297000  |
| H | 6.503453000  | 2.261725000  | 3.564902000  |
| H | 5.236036000  | 2.127595000  | 4.785175000  |
| H | 0.443761000  | 4.003532000  | 1.927800000  |
| H | 1.264223000  | 4.768691000  | 0.572181000  |
| H | 1.604586000  | 5.309913000  | 2.228972000  |
| H | 4.620088000  | -4.163805000 | -0.419339000 |
| H | 4.181133000  | -1.227812000 | -3.508360000 |
| H | 1.135475000  | -4.724624000 | 0.093370000  |
| H | 1.773637000  | -3.567427000 | 1.258011000  |
| H | 2.755645000  | -4.977259000 | 0.775279000  |
| H | 6.593081000  | -2.012315000 | -1.786430000 |
| H | 6.245627000  | -2.691280000 | -3.377320000 |
| H | 6.465608000  | -3.762539000 | -1.983874000 |
| H | 0.693622000  | -1.082799000 | -3.624446000 |
| H | 2.154985000  | -0.107562000 | -3.850069000 |
| H | 1.187281000  | 0.056704000  | -2.377065000 |
| H | -3.472226000 | -4.369714000 | 3.367098000  |
| H | -5.289062000 | -0.734839000 | 1.996618000  |
| H | -0.443752000 | -4.003236000 | 1.927939000  |
| H | -1.264148000 | -4.768266000 | 0.572210000  |
| H | -1.604609000 | -5.309642000 | 2.228930000  |
| H | -5.707799000 | -3.718519000 | 4.183431000  |
| H | -6.503591000 | -2.261734000 | 3.564780000  |
| H | -5.236267000 | -2.127187000 | 4.785102000  |
| H | -3.458086000 | -0.448201000 | -1.025959000 |
| H | -2.596593000 | 0.445437000  | 0.223261000  |
| H | -4.369799000 | 0.492476000  | 0.162240000  |

Cartesian coordinates and energies ( $E_h$ ) of **bisNHCPS**, scrf=(cpcm,solvent=THF)

E(RB3PW91) = -2035.98526287

Sum of electronic and zero-point Energies= -2035.115023

Sum of electronic and thermal Energies= -2035.064248

Sum of electronic and thermal Enthalpies= -2035.063304

Sum of electronic and thermal Free Energies= -2035.200665

|   |              |              |              |
|---|--------------|--------------|--------------|
| N | 0.447180000  | -2.469411000 | -1.159081000 |
| N | -1.523745000 | -2.254350000 | -0.179315000 |
| N | -0.447197000 | 2.469348000  | -1.159033000 |
| N | 1.523717000  | 2.254331000  | -0.179240000 |
| N | 0.507126000  | -1.416315000 | 0.948574000  |
| N | -0.507217000 | 1.416123000  | 0.948536000  |
| C | -0.158672000 | -1.977600000 | 0.002983000  |

|   |              |              |              |
|---|--------------|--------------|--------------|
| C | -0.514669000 | -3.014502000 | -2.011573000 |
| C | -1.714232000 | -2.886929000 | -1.417651000 |
| C | 0.158643000  | 1.977490000  | 0.003028000  |
| C | 0.514636000  | 3.014563000  | -2.011458000 |
| C | 1.714199000  | 2.886950000  | -1.417555000 |
| C | -0.146552000 | -0.753920000 | 2.055785000  |
| C | 0.146270000  | 0.753668000  | 2.055833000  |
| C | 1.848731000  | -2.530339000 | -1.407769000 |
| C | 2.403108000  | -1.709697000 | -2.402278000 |
| C | 3.763642000  | -1.834042000 | -2.687493000 |
| C | 4.584838000  | -2.720689000 | -1.987254000 |
| C | 4.006362000  | -3.508871000 | -0.989945000 |
| C | 2.643340000  | -3.439637000 | -0.691930000 |
| C | 1.570248000  | -0.662779000 | -3.082014000 |
| C | 6.061915000  | -2.789357000 | -2.270997000 |
| C | 2.044870000  | -4.303899000 | 0.377857000  |
| C | -2.518320000 | -2.347895000 | 0.845731000  |
| C | -3.548057000 | -1.396159000 | 0.885794000  |
| C | -4.529910000 | -1.527883000 | 1.869673000  |
| C | -4.505195000 | -2.569672000 | 2.801782000  |
| C | -3.469548000 | -3.504794000 | 2.725405000  |
| C | -2.471380000 | -3.417713000 | 1.752274000  |
| C | -3.541401000 | -0.247176000 | -0.073431000 |
| C | -5.553606000 | -2.664405000 | 3.878777000  |
| C | -1.356260000 | -4.420941000 | 1.688006000  |
| C | -1.848748000 | 2.530308000  | -1.407727000 |
| C | -2.643365000 | 3.439500000  | -0.691757000 |
| C | -4.006383000 | 3.508784000  | -0.989767000 |
| C | -4.584851000 | 2.720766000  | -1.987211000 |
| C | -3.763645000 | 1.834248000  | -2.687599000 |
| C | -2.403112000 | 1.709851000  | -2.402393000 |
| C | -2.044908000 | 4.303594000  | 0.378174000  |
| C | -6.061928000 | 2.789474000  | -2.270942000 |
| C | -1.570249000 | 0.663077000  | -3.082348000 |
| C | 2.518327000  | 2.347883000  | 0.845779000  |
| C | 2.471503000  | 3.417788000  | 1.752229000  |
| C | 3.469727000  | 3.504898000  | 2.725298000  |
| C | 4.505322000  | 2.569720000  | 2.801703000  |
| C | 4.529941000  | 1.527864000  | 1.869669000  |
| C | 3.548036000  | 1.396116000  | 0.885844000  |
| C | 1.356439000  | 4.421076000  | 1.687943000  |
| C | 5.553786000  | 2.664475000  | 3.878644000  |
| C | 3.541273000  | 0.247052000  | -0.073282000 |
| H | -0.239526000 | -3.433799000 | -2.966139000 |
| H | -2.700657000 | -3.177237000 | -1.742494000 |

|   |              |              |              |
|---|--------------|--------------|--------------|
| H | 0.239492000  | 3.433913000  | -2.966001000 |
| H | 2.700622000  | 3.177278000  | -1.742385000 |
| H | 0.241774000  | -1.166309000 | 2.999838000  |
| H | -1.234224000 | -0.883866000 | 2.081878000  |
| H | -0.242200000 | 1.166024000  | 2.999845000  |
| H | 1.233929000  | 0.883592000  | 2.082120000  |
| H | 4.198349000  | -1.197952000 | -3.455720000 |
| H | 4.628791000  | -4.207580000 | -0.434541000 |
| H | 0.699198000  | -1.088120000 | -3.588933000 |
| H | 2.157292000  | -0.107467000 | -3.817603000 |
| H | 1.193924000  | 0.051759000  | -2.342089000 |
| H | 6.601616000  | -2.024740000 | -1.698684000 |
| H | 6.276117000  | -2.612727000 | -3.329428000 |
| H | 6.480832000  | -3.761070000 | -1.993726000 |
| H | 1.748135000  | -3.681973000 | 1.229560000  |
| H | 2.752703000  | -5.062474000 | 0.720728000  |
| H | 1.140620000  | -4.805917000 | 0.020404000  |
| H | -5.330861000 | -0.792585000 | 1.911920000  |
| H | -3.439244000 | -4.327575000 | 3.436804000  |
| H | -2.649967000 | 0.371994000  | 0.088189000  |
| H | -4.423841000 | 0.386108000  | 0.043703000  |
| H | -3.504733000 | -0.587210000 | -1.112044000 |
| H | -5.693262000 | -3.696252000 | 4.214201000  |
| H | -6.518926000 | -2.282400000 | 3.533255000  |
| H | -5.264886000 | -2.072054000 | 4.755696000  |
| H | -0.409780000 | -3.961740000 | 1.992522000  |
| H | -1.215088000 | -4.790223000 | 0.666814000  |
| H | -1.550061000 | -5.273966000 | 2.342651000  |
| H | -4.628815000 | 4.207406000  | -0.434259000 |
| H | -4.198339000 | 1.198306000  | -3.455956000 |
| H | -1.140593000 | 4.805584000  | 0.020847000  |
| H | -1.748283000 | 3.681548000  | 1.229828000  |
| H | -2.752710000 | 5.062180000  | 0.721082000  |
| H | -6.601643000 | 2.024884000  | -1.698604000 |
| H | -6.276149000 | 2.612830000  | -3.329366000 |
| H | -6.480813000 | 3.761203000  | -1.993681000 |
| H | -0.699015000 | 1.088486000  | -3.588886000 |
| H | -2.157203000 | 0.108145000  | -3.818297000 |
| H | -1.194214000 | -0.051817000 | -2.342617000 |
| H | 3.439509000  | 4.327741000  | 3.436629000  |
| H | 5.330859000  | 0.792530000  | 1.911930000  |
| H | 0.409943000  | 3.961930000  | 1.992489000  |
| H | 1.215270000  | 4.790342000  | 0.666744000  |
| H | 1.550295000  | 5.274106000  | 2.342565000  |
| H | 5.693488000  | 3.696334000  | 4.214012000  |

|   |             |              |              |
|---|-------------|--------------|--------------|
| H | 6.519078000 | 2.282423000  | 3.533098000  |
| H | 5.265087000 | 2.072175000  | 4.755606000  |
| H | 3.504312000 | 0.586998000  | -1.111913000 |
| H | 2.649940000 | -0.372194000 | 0.088611000  |
| H | 4.423803000 | -0.386134000 | 0.043696000  |

Cartesian coordinates and energies ( $E_h$ ) of **bisNHCPs**, scrf=(cpcm,solvent=acetonitrile)

E(RB3PW91) = -2035.98706972

Sum of electronic and zero-point Energies= -2035.116981

Sum of electronic and thermal Energies= -2035.066189

Sum of electronic and thermal Enthalpies= -2035.065245

Sum of electronic and thermal Free Energies= -2035.202783

|   |              |              |              |
|---|--------------|--------------|--------------|
| N | -0.446685000 | 2.477891000  | -1.158670000 |
| N | 1.523867000  | 2.262522000  | -0.179544000 |
| N | 0.446599000  | -2.477685000 | -1.158638000 |
| N | -1.523927000 | -2.262134000 | -0.179507000 |
| N | -0.505993000 | 1.419333000  | 0.946331000  |
| N | 0.505995000  | -1.418972000 | 0.946278000  |
| C | 0.159405000  | 1.984617000  | 0.001895000  |
| C | 0.514525000  | 3.025282000  | -2.010528000 |
| C | 1.714253000  | 2.897351000  | -1.417094000 |
| C | -0.159457000 | -1.984237000 | 0.001870000  |
| C | -0.514653000 | -3.025052000 | -2.010465000 |
| C | -1.714367000 | -2.897007000 | -1.417027000 |
| C | 0.149186000  | 0.753471000  | 2.050613000  |
| C | -0.149131000 | -0.753137000 | 2.050605000  |
| C | -1.848535000 | 2.536983000  | -1.406847000 |
| C | -2.403521000 | 1.711765000  | -2.397156000 |
| C | -3.764738000 | 1.833820000  | -2.680589000 |
| C | -4.585542000 | 2.722977000  | -1.982880000 |
| C | -4.005961000 | 3.516880000  | -0.990472000 |
| C | -2.642303000 | 3.449825000  | -0.694524000 |
| C | -1.570460000 | 0.664033000  | -3.075429000 |
| C | -6.063138000 | 2.788993000  | -2.264461000 |
| C | -2.041633000 | 4.321071000  | 0.368641000  |
| C | 2.519021000  | 2.352788000  | 0.845124000  |
| C | 3.552752000  | 1.404977000  | 0.877400000  |
| C | 4.535539000  | 1.533781000  | 1.860901000  |
| C | 4.507907000  | 2.569097000  | 2.800344000  |
| C | 3.468280000  | 3.500573000  | 2.731596000  |
| C | 2.469289000  | 3.416432000  | 1.758881000  |
| C | 3.550711000  | 0.262595000  | -0.090120000 |

|   |              |              |              |
|---|--------------|--------------|--------------|
| C | 5.557678000  | 2.661046000  | 3.876244000  |
| C | 1.351240000  | 4.416838000  | 1.702074000  |
| C | 1.848458000  | -2.537120000 | -1.406661000 |
| C | 2.641913000  | -3.450062000 | -0.694121000 |
| C | 4.005590000  | -3.517497000 | -0.989893000 |
| C | 4.585492000  | -2.723845000 | -1.982316000 |
| C | 3.764995000  | -1.834563000 | -2.680227000 |
| C | 2.403768000  | -1.712147000 | -2.396991000 |
| C | 2.040887000  | -4.320983000 | 0.369113000  |
| C | 6.063109000  | -2.790254000 | -2.263691000 |
| C | 1.571052000  | -0.664305000 | -3.075518000 |
| C | -2.519008000 | -2.352436000 | 0.845228000  |
| C | -2.469111000 | -3.416079000 | 1.758973000  |
| C | -3.468022000 | -3.500324000 | 2.731761000  |
| C | -4.507729000 | -2.568944000 | 2.800590000  |
| C | -4.535514000 | -1.533609000 | 1.861170000  |
| C | -3.552809000 | -1.404699000 | 0.877599000  |
| C | -1.350951000 | -4.416362000 | 1.702086000  |
| C | -5.557425000 | -2.661007000 | 3.876553000  |
| C | -3.550953000 | -0.262306000 | -0.089908000 |
| H | 0.239146000  | 3.445754000  | -2.964526000 |
| H | 2.700387000  | 3.189042000  | -1.741596000 |
| H | -0.239301000 | -3.445648000 | -2.964417000 |
| H | -2.700517000 | -3.188692000 | -1.741482000 |
| H | -0.233263000 | 1.166527000  | 2.997009000  |
| H | 1.237549000  | 0.879170000  | 2.072616000  |
| H | 0.233344000  | -1.166211000 | 2.996982000  |
| H | -1.237495000 | -0.878823000 | 2.072645000  |
| H | -4.200184000 | 1.194178000  | -3.445385000 |
| H | -4.627903000 | 4.218309000  | -0.437956000 |
| H | -0.699150000 | 1.089232000  | -3.581962000 |
| H | -2.157102000 | 0.108295000  | -3.810939000 |
| H | -1.194598000 | -0.050344000 | -2.335051000 |
| H | -6.600829000 | 2.026367000  | -1.687650000 |
| H | -6.278881000 | 2.606918000  | -3.321620000 |
| H | -6.482562000 | 3.761462000  | -1.990746000 |
| H | -1.739767000 | 3.705403000  | 1.223018000  |
| H | -2.749953000 | 5.079684000  | 0.710347000  |
| H | -1.139990000 | 4.823483000  | 0.005093000  |
| H | 5.339942000  | 0.801895000  | 1.896681000  |
| H | 3.435923000  | 4.318654000  | 3.448285000  |
| H | 2.662258000  | -0.361868000 | 0.066682000  |
| H | 4.436117000  | -0.367377000 | 0.022415000  |
| H | 3.512288000  | 0.609332000  | -1.126481000 |
| H | 5.693301000  | 3.691183000  | 4.218379000  |

|   |              |              |              |
|---|--------------|--------------|--------------|
| H | 6.523906000  | 2.285201000  | 3.526640000  |
| H | 5.272828000  | 2.061665000  | 4.749637000  |
| H | 0.406361000  | 3.953329000  | 2.005127000  |
| H | 1.207501000  | 4.791508000  | 0.683262000  |
| H | 1.543593000  | 5.266536000  | 2.361381000  |
| H | 4.627291000  | -4.219006000 | -0.437208000 |
| H | 4.200694000  | -1.195125000 | -3.445051000 |
| H | 1.139134000  | -4.823190000 | 0.005552000  |
| H | 1.739115000  | -3.705101000 | 1.223371000  |
| H | 2.748956000  | -5.079747000 | 0.711002000  |
| H | 6.600929000  | -2.027816000 | -1.686751000 |
| H | 6.279056000  | -2.608172000 | -3.320806000 |
| H | 6.482224000  | -3.762856000 | -1.989975000 |
| H | 0.699610000  | -1.089341000 | -3.581953000 |
| H | 2.157879000  | -0.108935000 | -3.811159000 |
| H | 1.195422000  | 0.050379000  | -2.335311000 |
| H | -3.435536000 | -4.318407000 | 3.448442000  |
| H | -5.339979000 | -0.801796000 | 1.897019000  |
| H | -0.406092000 | -3.952739000 | 2.005031000  |
| H | -1.207266000 | -4.791051000 | 0.683274000  |
| H | -1.543140000 | -5.266059000 | 2.361440000  |
| H | -5.692905000 | -3.691157000 | 4.218706000  |
| H | -6.523718000 | -2.285280000 | 3.527002000  |
| H | -5.272596000 | -2.061583000 | 4.749923000  |
| H | -3.512540000 | -0.609042000 | -1.126267000 |
| H | -2.662574000 | 0.362280000  | 0.066851000  |
| H | -4.436431000 | 0.367561000  | 0.022663000  |

#### 4. References

- S1 L. Qin, X. Ren, Y. Lu, Y. Li, J. Zhou, *Angew. Chem. Int. Ed*, 2012, **51**, 5915-5919.
- S2 A. J. Arduengo, H. V. R. Dias, R. L. Harlow, M. Kline, *J. Am. Chem. Soc.*, 1992, **114**, 5530-5534.
- S3 P. W. Antoni, T. Bruckhoff, M. M. Hansmann, *J. Am. Chem. Soc.*, 2019, **141**, 9701-9711.
- S4 E. Hough, D. G. Nicholson, *J. Chem. Soc., Dalton Trans.*, 1976, 1782-1785.
- S5 M. H. Castany, H. Lavayssière, G. Dousse, *Synthesis and Reactivity in Inorganic and Metal-Organic Chemistry*, 1998, **28**, 781-801.
- S6 D. Franz, T. Szilvási, A. Pöthig, F. Deiser, S. Inoue, *Chem. Eur. J.*, 2018, **24**, 4283-4288.
- S7 M. Muhr, P. Heiß, M. Schütz, R. Bühler, C. Gemel, M. H. Linden, H. B. Linden, R. A. Fischer, *Dalton Trans.*, 2021, **50**, 9031-9036.

- S8 F. S. Tschernuth, F. Hanusch, T. Szilvási, S. Inoue, *Organometallics*, 2020, **39**, 4265-4272.
- S9 *APEX suite of crystallographic software*, 2015.5-2; Bruker AXS Inc: Madison, Wisconsin, USA, 2015.
- S10 *SAINT and SADABS*, 7.56a and 2008/1; Bruker AXS Inc: Madison, Wisconsin, USA, 2008.
- S11 G. M. Sheldrick *SHELXL-2014*, University of Göttingen: Göttingen, Germany, 2014.
- S12 C. B. Hubschle, G. M. Sheldrick, B. Dittrich, *J. Appl. Crystallogr.*, 2011, **44**, 1281-1284.
- S13 G. M. Sheldrick *SHELXL-97*, University of Göttingen: Göttingen, Germany, 1998.
- S14 A. J. C. Wilson, V. Geist, International Tables for Crystallography. Volume C: Mathematical, Physical and Chemical Tables. Kluwer Academic Publishers (published for the International Union of Crystallography): Dordrecht/Boston/London, 1992; Vol. C, pp Tables 6.1.1.4 (pp 500-502), 4.2.6.8 (pp. 219-222) and 4.2.4.2 (pp. 193-199).
- S15 C. F. Macrae, I. J. Bruno, J. A. Chisholm, P. R. Edgington, P. McCabe, E. Pidcock, L. Rodriguez-Monge, R. Taylor, J. van de Streek, P. A. Wood, *J. Appl. Crystallogr.*, 2008, **41**, 466-470.
- S16 Gaussian 16, Revision C.01, M. J. Frisch, G. W. Trucks, H. B. Schlegel, G. E. Scuseria, M. A. Robb, J. R. Cheeseman, G. Scalmani, V. Barone, G. A. Petersson, H. Nakatsuji, X. Li, M. Caricato, A. V. Marenich, J. Bloino, B. G. Janesko, R. Gomperts, B. Mennucci, H. P. Hratchian, J. V. Ortiz, A. F. Izmaylov, J. L. Sonnenberg, D. Williams-Young, F. Ding, F. Lipparini, F. Egidi, J. Goings, B. Peng, A. Petrone, T. Henderson, D. Ranasinghe, V. G. Zakrzewski, J. Gao, N. Rega, G. Zheng, W. Liang, M. Hada, M. Ehara, K. Toyota, R. Fukuda, J. Hasegawa, M. Ishida, T. Nakajima, Y. Honda, O. Kitao, H. Nakai, T. Vreven, K. Throssell, J. A. Montgomery, Jr., J. E. Peralta, F. Ogliaro, M. J. Bearpark, J. J. Heyd, E. N. Brothers, K. N. Kudin, V. N. Staroverov, T. A. Keith, R. Kobayashi, J. Normand, K. Raghavachari, A. P. Rendell, J. C. Burant, S. S. Iyengar, J. Tomasi, M. Cossi, J. M. Millam, M. Klene, C. Adamo, R. Cammi, J. W. Ochterski, R. L. Martin, K. Morokuma, O. Farkas, J. B. Foresman, and D. J. Fox, Gaussian, Inc., Wallingford CT, 2016.
- S17 A.D. Becke, *J. Chem. Phys.*, 1993, **98**, 5648
- S18 (a) S. Grimme, S. Ehrlich, L. Goerigk, *J. Comput. Chem.*, 2011, **32**, 1456 – 1465; (b) S. Grimme, J. Antony, S. Ehrlich and H. Krieg, *J. Chem. Phys.*, 2010, **132**, 154104
- S19 S. Huzinaga, J. Andzelm, M. Klobukowski, E. RadzioAndzelm, Y. Sakai and H. Tatewaki. Gaussian Basis Sets for Molecular Calculations, Elsevier: Amsterdam, 1984.

- S20 (a) R. Ditchfield, W. J. Hehre, and J. A. Pople, *J. Chem. Phys.*, 1971, **54**, 724; (b) W. J. Hehre, R. Ditchfield, and J. A. Pople, *J. Chem. Phys.*, 1972, **56**, 2257; (c) P. C. Hariharan and J. A. Pople, *Theor. Chem. Acc.*, 1973, **28**, 213-22; (d) P. C. Hariharan and J. A. Pople, *Mol. Phys.*, 1974, **27**, 209- 14; (e) M. M. Francl, W. J. Pietro, W. J. Hehre, J. S. Binkley, D. J. DeFrees, J. A. Pople, and M. S. Gordon, *J. Chem. Phys.*, 1982, **77**, 3654-65; (f) J.-P. Blaudeau, M. P. McGrath, L. A. Curtiss, and L. Radom, *J. Chem. Phys.*, 1997, **107**, 5016-21; (g) A. J. H. Wachters, *J. Chem. Phys.*, 1970, **52**, 1033; (h) L. A. Curtiss, M. P. McGrath, J.-P. Blaudeau, N. E. Davis, R. C. Binning Jr., and L. Radom, *J. Chem. Phys.*, 1995, **103**, 6104-6113; (i) M. Swart, M. Güell, J. M. Luis, and M. Solà, *J. Phys. Chem. A*, 2010, **114**, 7191 - 7197.
- S21 NBO 7.0. E. D. Glendening, J. K. Badenhoop, A. E. Reed, J. E. Carpenter, J. A. Bohmann, C. M. Morales, P. Karafiloglou, C. R. Landis, and F. Weinhold, Theoretical Chemistry Institute, University of Wisconsin, Madison (2018).
- S22 T. Lu and F. Chen, *J. Comput. Chem.*, **33**, 580-592 (2012).
